# Supplementary material for: FBN-1, a fibrillin-related protein, is required for resistance of the epidermis to mechanical deformation during C. elegans embryogenesis
Source: eLife journal article supplement (doi:10.7554/elife.06565), 2015-03-23
Supplement: supp [file elife-06565-supp-v1.zip]

#### **SUPPLEMENTARY FILE 4. Figure legend for Supplemental File 3.**

**File 1: Gene Regions.** Gene regions determined to be differentially expressed in *mec-8* animals as compared with wild type. Genes for which all exons were up or down regulated are in bold. **Region** indicates the specific exons or introns of a transcript that were up or down regulated in *mec-8* animals. Note that exon or intron numbering is specific to individual isoforms (as indicated) and may differ between isoforms. For example, the region encompassing intron 14 in *fbn-1b,d,e* corresponds to introns 14–15 in *fbn-1a,k* and the region encompassing intron 15 in *fbn-1e* corresponds to introns 16–18 in *fbn-1a,k*. **Start** and **End** indicate the flanking genomic positions of the differentially expressed exons or introns. **Difference** is the length in nucleotides of the exons or introns that were differentially expressed. **Probes** indicate the actual number of 25-nt probes that hybridized the indicated region. **D/25** is the theoretical number of 25-nucleotide (nt) probes that cover the length of the genomic fragment. **N2 avg** and **mec-8 avg** are the averaged intensities from three replicates. **N2 SD** and **mec-8 SD** are the standard deviation of the three replicates. **Ratio** is the average intensity of *mec-8* divided by the average intensity of N2. **SD ratio** is the standard deviation of the *mec-8*/N2 ratio of intensity. **AS** (alternatively spliced) indicates whether the gene is alternatively spliced. Gene ratios are color coded according to groups: orange, introns up; green, exons down; red, exons up. *fbn-1* and *mec-8* gene names are highlighted in red. In some cases different regions from the same gene are separated based on ratio rankings.

**File 2: Transcripts.** Transcripts differentially expressed in *mec-8* animals compared to wild type. **Average ratio** is the average of the ratios of each gene region of the transcript.

**File 3: Gene lists.** Alphabetical list of all differentially expressed genes including category subdivisions.

**File 4. Alternatively (Alt.) Spliced Genes.** Alphabetical list of all differentially expressed genes including category divisions and information regarding alternative splicing.

**File 5. Sequences of primers (5'–3') used to amplify candidate gene regions.**

Expected sizes for candidates that are differentially expressed in *mec-8* mutants are indicated. Orange indicates introns upregulated in *mec-8*; red, exons upregulated in *mec-8*; blue, exons downregulated in *mec-8*. For genes that contain intronic regions that are upregulated in *mec-8*, sizes with and without, respectively, intronic sequences are shown.
