# Supplementary material for: FBN-1, a fibrillin-related protein, is required for resistance of the epidermis to mechanical deformation during C. elegans embryogenesis
Source: eLife journal article supplement (doi:10.7554/elife.06565), 2015-03-23
Supplement: supp [file elife-06565-supp-v1.zip]

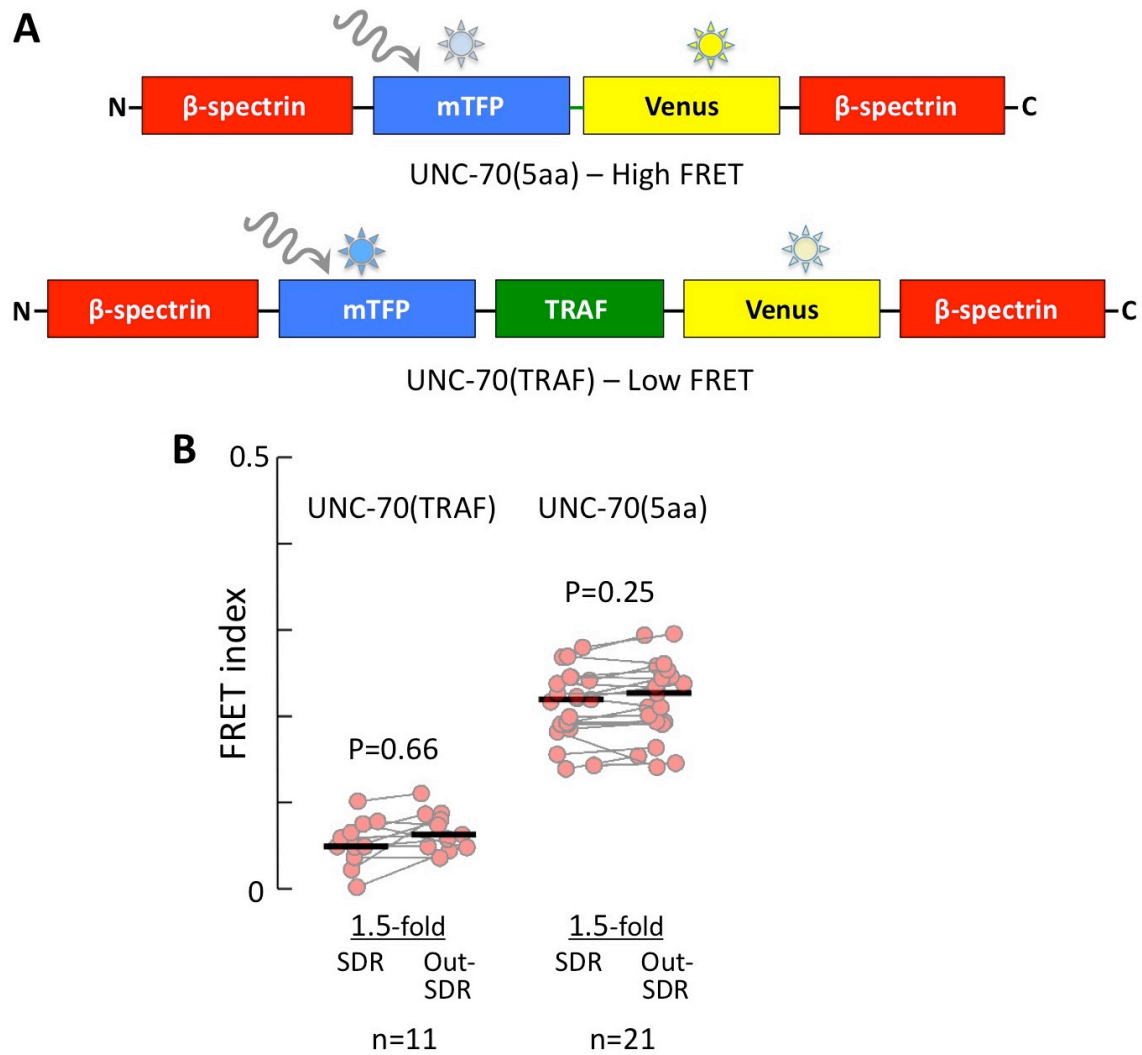

**Figure 3–figure supplement 1. FRET index of low and high FRET controls.** (A) Schematic of UNC-70(5aa) and UNC-70(TRAF) FRET controls. (B) Quantification of low (UNC-70(TRAF)) and high (UNC-70(5aa)) FRET controls in 1.5-fold embryos.
