# Supplementary material for: FBN-1, a fibrillin-related protein, is required for resistance of the epidermis to mechanical deformation during C. elegans embryogenesis
Source: eLife journal article supplement (doi:10.7554/elife.06565), 2015-03-23
Supplement: supp [file elife-06565-supp-v1.zip]

Figure 4–figure supplement 2. Amino Acid Sequence of FBN-1.

**FBN-1 isoform A**

1 **MSTRSRGSCSSPWFITPLVLLALCRGSHQIAKNFVNSSTPDLRPTFVVNF**  
51 **DTSTVICQHSSDPTDLHIHNMSSLCDGKQDCFVNPAMHDEVFPYCEHKCQ**  
↓*ns67(P116L)* ↓*ns283*  
101 **STCSGKGA** **CLYDGAKPQ** **CYCDSGFSGSA** **CELQDKNE** **CLEHPC** **HMMAQC** **QN**  
**(C148Y)**  
151 **TLGSYECR** **CLPGYEGNGHECT** **DID** **ECSDKLTSR** **CPEHSK** **CINLPGTY** **CN**  
201 **CTQGFTPKGNQGSGLDK** **CADINE** **CETGAHN** **CADEI** **CENSIGSF** **KCVNKC**  
251 **SPGYELIDGKCE** **DVNE** **CGSEK** **LHKCDV** **RADC** **VNTIGGYE** **CECE** **EEGFEGDG**  
301 **KN** **CQPKS** **SCRKNSA** **ICDR** **HASCH** **IVLDI** **CDCKT** **GYTGDG** **ITCH** **DINE** **CDA**  
351 **KDTP** **CSDGGR** **CLNLD** **GGYV** **CCKNG** **QDDAT** **CI** **KDQGA** **FC** **SGGC** **GDNA** **ICSN**  
401 **AT** **CACID** **GRGD** **PHKK** **CV** **DINE** **CVEND** **SV** **CGGV** **GDRC** **VN** **LFGG** **FKCC** **QH** **G**  
451 **STEA** **ECT** **DQAF** **SSDS** **STISS** **HGAD** **FTTT** **GEQI** **IEG** **SGSI** **QTSS** **GGSI** **TVT**  
501 **RGLIP** **KDVEL** **TTSGRL** **ACTSY** **CPP** **NSECV** **GGYCE** **CV** **SGYGG** **NALV** **GC** **EDI**  
551 **DECITEI** **CN** **IEAN** **EWCV** **NLIG** **GFVCC** **NPTN** **ATHDD** **CIEIT** **KEK** **GLHV** **IGG**  
601 **NEED** **TVVAT** **RSNH** **STSD** **QLIT** **QVVQ** **QSRN** **FSTG** **QIIL** **TRGK** **VSSG** **EAVT** **Q**  
651 **TTDA** **DEFGL** **EISA** **ADLAG** **SGSG** **ITLPT** **TLEPK** **IEG** **SGK** **KASG** **GVWTE** **EDE**  
↓*tm290(deletion)*  
701 **GEDE** **DLME** **EGSG** **SWST** **TING** **TGIT** **GS** **PR** **SEGT** **IR** **VRIT** **TLG** **EDGE** **PETAT**  
751 **KPGI** **SAPDK** **TGEG** **SKTES** **DGEE** **KLTVE** **KDG** **KEA** **QSSG** **SATSS** **GKK** **SEAT**  
801 **SGSS** **SSSA** **KSGT** **GSEAS** **GSSG** **ASSSS** **SGSV** **SGES** **GSSV** **STES** **GS** **FGT** **SSS**  
851 **GSV** **GSEAT** **GSTG** **VDG** **SESG** **KPSK** **SSTEE** **KLP** **FTK** **NGEK** **SPI** **SGSD** **TTG** **KE**  
901 **SSE** **ETTS** **RKPI** **EGSD** **SLTE** **GS** **SGE** **WFET** **GSK** **GHF** **ESG** **SKV** **SVT** **SGK** **GPT**  
951 **QSGA** **EGSG** **SGPK** **VKGP** **GAPE** **IT** **DGE** **ESS** **STST** **GDK** **SGG** **KPAD** **KSD** **NKN**  
1001 **VPKT** **GDKN** **PDIT** **TDGED** **STSET** **SGGE** **QGP** **KGK** **SKG** **QPP** **GDK** **GSE** **VKK** **P** **T**  
1051 **EVD** **GPGN** **LSGT** **KGK** **SNV** **PLK** **PTDL** **PEEG** **SGIL** **TSS** **GGK** **NST** **FEH** **G** **T** **K** **L** **E**

1101 RLPPKTEDKSSETPQLGLEISAGKKPEPEDGTSKEVGLLEILWESTTPGST  
1151 TLDSDSVGLLEISGSDLTKATKKPHVEIEGSGTGDEEITATTRDVSKSTKK  
1201 PRVEVDGGDNGETSGVDGKPTTPAPTSSSAESSTSRIPPTTSEASPEGGS  
1251 GEAGVPESPDGSGESSTSAPDGVSPPTSSATAPEVPTTSASSTPDAVEESG  
1301 IPSTSKPTAEPLETTAPSTEVTSPGSGTEESTLPPTEGSGESTTSSAPT  
1351 VEPATVLPQNRNEKPEPTKDTFALPTTTTGAPQANDSSVENTKCTSSDE  
1401 CGLDALCERRTGVCRCPEPGFEGAPPKKS CVDVD ECATGDHNC HESARCQN  
1451 YVGGYACFCPTGFRKADDGSCQDIDEC TEHNSTCCGANAKCVNKP GTYSC  
1501 ECENGLFGDGYQCVPTTKKPCDSTQSSKSHCSESNMSC EVDTV DGSVECK  
1551 ECMGGYKKS GKVCEDINECVAEKAPCSLNANCVNMNGTFSCSCKQGYRGD  
1601 GFMCTDINECDERHPCHPHAECTNLEGSFKCECHSGFEGDGIKKCTNPLE  
1651 RSCEDVEKF CGRVDHVSCLSVRIYNGSLSSVCECEPGFRFEKESNSCVDI  
1701 DECEESRNNCDPASAVCVNTEGSYRCECAEGYEGEGGVCTDIDECDRGMA  
1751 GCDSMAMCINRMGSCGCKCMAGYTG DGATCIKIEEEP KSDKTA CTDEWSR  
1801 LCELEKKQCTVDEEEVPOCGACLPGHHPINGTCSLQISGLCAQKND CNK  
1851 HAECDIDIHPDSHFCSCP DGFIGDGMICDDVDECNNAGMCD DENTKCENTI  
1901 GSFNCVCLEGFKKVDEKCVVDEKKQPNREKIEIDEENSSSSNSGQEKPTT  
1951 KGDTNSTTPSTSSLASVKSTS APEERTTVSTTVSTTTPTEETTSES LIL  
2001 TAAPSKPTESTTESSEAPTPAKTSETKSLTTPQPPPTTTTAKPATTSG  
2051 KRGPPIQPPAEMFTTPAPPPPSNGGYGEETNQEEEQVTSTTTTEAPS LC  
2101 STVTC HSLATCEQSTGVCICRDGFIGDGT TACS KKSTAD C I S L P S L C A D K  
2151 AKCDNSTRSCECDAGYIGDGYVCS PHPQDCVLRDNLCSPEAVCQNRRCQC  
2201 LPGFTGDGVKCVSIHERASNC SQCDANAHC VGGTTCKCNPGYFGNGLCCV  
2251 PDPLDCVHFTGICHPNAV CNSERQCQCSSGFSGNGVSCFPQKSCRTDKS

2301 **VCAKNAICLPTGSCICR**HGFKGDPFYK**CS**SSLVSKEPANQQDLSDV**SCVT**  
 2351 **PCDSSTQLCISGECIC**KSGFRRNSTLSG**SETCAD**IDE**CAEKSHKCDRVAT**  
 2401 **CRNTFGSHVCTCPDGHVGDGITCV**PHVNQGKLSVY**CEADGMTLVLGNETA**  
 2451 **DFEGKIFVKGQAENPYCSKSFSSLLNSRKPYPVFKVVFQHC**DVQLLDN**HTM**  
 2501 **ASTVVVQKHAMFLTNKADSYDLRCQYPIGSRAVESHVNVSE**LATTSTL**TE**  
 2551 **KNSTLAPICRLSVSNDQHSSISSAMVGD**TLKLAL**EVTPSE**NGILPR**NCF**  
 2601 **AINIESGERYTTLTDDM**GCAID**ESLFPQWSAATSSKVQAVFRTFKWP**DSS**M**  
 2651 **IRFQCDCNPCVGCSTPTC**ISS**ARFR**HQTTSPVVNDEIRQ**EMVLM**SGVE  
 2701 SLAVSSIINVHDSHDMNTSDDDDVTSS**HVDATSKESK**SICV**KMAPLLIAL**  
 2751 **GSFAVCSAILLYLCS**KKPKTIDLESELRF

**Ca-binding EGF-like**

**EGF-like**

**RGD-integrin binding**

**Zona pellucida**

**Furin cleavage**

**Transmembrane**

## Signal Peptide

### FBN-1 Isoform A

| Region(a.a.) | Predicted Domain    |           |                       |
|--------------|---------------------|-----------|-----------------------|
| 1-27         | SP                  | 1609-1646 | Ca-binding EGF-like   |
| 94-130       | Ca-binding EGF-like | 1652-1698 | Ca-binding EGF-like   |
| 136-171      | Ca-binding EGF-like | 1702-1740 | Ca-binding EGF-like   |
| 175-219      | Ca-binding EGF-like | 1741-1781 | Ca-binding EGF-like   |
| 223-262      | Ca-binding EGF-like | 1796-1834 | Ca-binding EGF-like   |
| 265-304      | Ca-binding EGF-like | 1843-1878 | Ca-binding EGF-like   |
| 308-343      | EGF-like            | 2098-2133 | Ca-binding EGF-like   |
| 344-381      | Ca-binding EGF-like | 2139-2174 | Ca-binding EGF-like   |
| 387-418      | Ca-binding EGF-like | 2179-2212 | EGF-like              |
| 410-412      | RGD                 | 2220-2250 | EGF-like              |
| 421-457      | Ca-binding EGF-like | 2255-2290 | EGF-like              |
| 517-559      | Ca-binding EGF-like | 2294-2329 | EGF-like              |
| 1394-1430    | Ca-binding EGF-like | 2347-2383 | Ca-binding EGF-like   |
| 1433-1472    | Ca-binding EGF-like | 2387-2424 | Ca-binding EGF-like   |
| 1476-1514    | Ca-binding EGF-like | 2436-2672 | Zona pellucida domain |
| 1530-1564    | Ca-binding EGF-like | 2674-2677 | Furin cleavage site   |
| 1568-1607    | Ca-binding EGF-like | 2743-2765 | Transmembrane domain  |
| 1598-1600    | RGD                 |           |                       |

**Figure 4–figure supplement 2.** Annotated peptide sequence for FBN-1 (a isoform). Locations of domains and genetic mutations are indicated.
