# Supplementary material for: FBN-1, a fibrillin-related protein, is required for resistance of the epidermis to mechanical deformation during C. elegans embryogenesis
Source: eLife journal article supplement (doi:10.7554/elife.06565), 2015-03-23
Supplement: supp [file elife-06565-supp-v1.zip]

Archive with 8 entries (8 files):
- elife_poa_e06565_Supplementary_File_5.xlsx
- elife_poa_e06565_Supplementary_File_3.xlsx
- elife_poa_e06565_Figure_3_figure_supplement_1.pdf
- elife_poa_e06565_Figure_4_figure_supplement_2.pdf
- elife_poa_e06565_Supplementary_File_4.pdf
- elife_poa_e06565_Supplementary_File_1.pdf
- elife_poa_e06565_Supplementary_File_2.pdf
- elife_poa_e06565_Figure_4_figure_supplement_1.pdf
