# Supplementary material for: FBN-1, a fibrillin-related protein, is required for resistance of the epidermis to mechanical deformation during C. elegans embryogenesis
Source: eLife journal article supplement (doi:10.7554/elife.06565), 2015-03-23
Supplement: supp [file elife-06565-supp-v1.zip › elife_poa_e06565_Supplementary_File_1.pdf]

## Supplementary File 1. Percentage of Pin Animals

| Genotype                             | # Pin | N    | % Pin | 95% CI           |
|--------------------------------------|-------|------|-------|------------------|
| N2                                   | 0     | >500 | 0     | ND               |
| <i>sym-3(mn618)</i>                  | 3     | 114  | 2.6   | 0.6–7.8          |
| <i>sym-4 (mn619)</i>                 | 76    | 539  | 14.1  | 11.4–17.3        |
| <i>mec-8(u74)</i>                    | 5     | 126  | 4.0   | 1.5–9.2          |
| <i>mec-8; sym-3<sup>a</sup></i>      | 131   | 132  | 99    | 95.4–100         |
| <i>mec-8; sym-4</i>                  | 267   | 280  | 95.3  | 92.1–97.3        |
| N2 control(RNAi)                     | 0     | 42   | 0     | ND               |
| N2 <i>fbn-1</i> (RNAi)               | 0     | 113  | 0     | ND               |
| <i>sym-3; control</i> (RNAi)         | 2     | 123  | 1.6   | 0.1–6.1          |
| <i>sym-3; fbn-1</i> (RNAi)           | 80    | 135  | 59.2  | 50.8–67.2 (±8.2) |
| <i>sym-4; control</i> (RNAi)         | 4     | 86   | 4.7   | 1.5–11.4(±5.1)   |
| <i>sym-4; fbn-1</i> (RNAi)           | 44    | 135  | 32.6  | 25.2–40.9(±7.9)  |
| <i>mec-8; control</i> (RNAi)         | 10    | 132  | 7.6   | 4.2–13.4(±4.6)   |
| <i>mec-8; fbn-1</i> (RNAi)           | 50    | 196  | 25.5  | 19.9–32.0(±6.1)  |
| <i>lin-35; control</i> (RNAi)        | 0     | 86   | 0     | ND               |
| <i>lin-35; fbn-1</i> (RNAi)          | 23    | 68   | 33.8  | 23.7–45.7(±11.0) |
| <i>lin-35; sym-3; control</i> (RNAi) | 6     | 73   | 8.2   | 3.5–17.1(±6.8)   |
| <i>lin-35; sym-3; fbn-1</i> (RNAi)   | 66    | 75   | 88    | 78.5–93.8(±7.7)  |
| <i>lin-35; sym-4; control</i> (RNAi) | 14    | 116  | 12.1  | 7.2–19.4(±6.1)   |
| <i>lin-35; sym-4; fbn-1</i> (RNAi)   | 113   | 120  | 94.2  | 88.2–97.4(±4.6)  |
| <i>mec-8; rrf-3; control</i> (RNAi)  | 5     | 94   | 5.3   | 2.0–12.2(±5.1)   |
| <i>mec-8; rrf-3; fbn-1</i> (RNAi)    | 35    | 42   | 83.3  | 69.1–92.0(±11.5) |
| N2                                   | 0     | >500 | 0     | ND               |

|                                                      |     |      |      |                 |
|------------------------------------------------------|-----|------|------|-----------------|
| <i>sym-3</i>                                         | 3   | 114  | 2.6  | 0.6–7.8         |
| <i>sym-4</i>                                         | 76  | 539  | 14.1 | 11.4–17.3       |
| <i>fbn-1(ns67)</i>                                   | 54  | 124  | 43.5 | 35.1–52.3       |
| <i>fbn-1(ns283)</i>                                  | 66  | 154  | 42.9 | 35.3–50.8       |
| <i>fbn-1(tm290)</i>                                  | 949 | 187  | 19.7 | 17.3–22.4       |
| <i>fbn-1(ns67); sym-3</i>                            | 89  | 90   | 98.9 | 93.4–100        |
| <i>fbn-1(ns67); sym-4</i>                            | 86  | 86   | 100  | 95–100          |
| <i>mec-8; fbn-1(n67)</i>                             | 58  | 60   | 96.7 | 88–99.7         |
| <i>fbn-1(tm290); sym-3</i>                           | 96  | 96   | 100  | 95.4–100        |
| <i>fbn-1(tm290); sym-4</i>                           | 71  | 71   | 100  | 93.9–100        |
| <i>mec-8; fbn-1(tm290)</i>                           | 155 | 155  | 100  | 97.1–100        |
| N2                                                   | 0   | >500 | 0    | ND              |
| <i>mec-8; sym-4</i>                                  | 267 | 280  | 95.3 | 92.1–97.3       |
| <i>mec-8; sym-4; fdEx251</i>                         | 42  | 104  | 40.1 | 31.5–50.0       |
| <i>mec-8; sym-4; fdEx254</i>                         | 63  | 103  | 61.1 | 51.5–70.0       |
| N2; control(RNAi)                                    | 0   | 42   | 0    | 0–10            |
| N2; <i>fbn-1</i> (RNAi)                              | 0   | 113  | 0    | 0–3.9           |
| <i>mec-8</i> ; control(RNAi)                         | 10  | 132  | 7.6  | 4.2–13.4(±4.6)  |
| <i>mec-8; fbn-1</i> (RNAi)                           | 50  | 196  | 25.5 | 19.9–32.0(±6.1) |
| <i>rde-1</i> ; control(RNAi-Hyp) <sup>b</sup>        | 0   | 58   | 0    | ND              |
| <i>rde-1; fbn-1</i> (RNAi-Hyp) <sup>b</sup>          | 0   | 93   | 0    | ND              |
| <i>mec-8; rde-1</i> ; control(RNAi-Hyp) <sup>b</sup> | 14  | 177  | 7.9  | 4.7–12.9        |
| <i>mec-8; rde-1; fbn-1</i> (RNAi-Hyp) <sup>b</sup>   | 31  | 159  | 19.5 | 14–26.4         |

<sup>a</sup>Because this strain (WY893) gives rise to a high frequency of viable *mnEx169*(–) progeny in the first generation following loss of the array (F1 escapers), next-generation progeny (F2) from *mnEx169*(–) F1

parents were scored. <sup>b</sup>Strains were derived from NR222. CI, confidence interval; ND, not determined. CIs were calculated using the Agresti-Coull method.
