# Supplementary material for: FBN-1, a fibrillin-related protein, is required for resistance of the epidermis to mechanical deformation during C. elegans embryogenesis
Source: eLife journal article supplement (doi:10.7554/elife.06565), 2015-03-23
Supplement: supp [file elife-06565-supp-v1.zip › elife_poa_e06565_Supplementary_File_2.pdf]

## Supplementary File 2 (A–D). Statistical analysis of FRET data.

### A. T-test values for UNC-70(TSMod) strains.

|                                                | TS(Mod)<br>N2<br>Comma<br>SDR | TS(Mod)<br>N2<br>Comma<br>Out-SDR | TS(Mod)<br>N2<br>1.5-fold<br>SDR | TS(Mod)<br>N2<br>1.5-fold<br>Out-SDR  | TS(Mod)<br><i>pha-1</i><br>Comma<br>SDR | TS(Mod)<br><i>pha-1</i><br>Comma<br>Out-SDR | TS(Mod)<br><i>pha-1</i><br>1.5-fold<br>SDR | TS(Mod)<br><i>pha-1</i><br>1.5-fold<br>Out-SDR |
|------------------------------------------------|-------------------------------|-----------------------------------|----------------------------------|---------------------------------------|-----------------------------------------|---------------------------------------------|--------------------------------------------|------------------------------------------------|
| TS(Mod)<br>N2<br>Comma<br>SDR                  |                               | P=0.5572<br>P=0.1683              | <b>P=0.0001</b>                  | P=0.7456                              | P=1.0000                                | P=0.4204                                    | P=0.7089                                   | P=0.2554                                       |
| TS(Mod)<br>N2<br>Comma<br>Out-SDR              |                               |                                   | <b>P=0.0004</b>                  | P=0.7626                              | P=0.5879                                | P=0.2288                                    | P=0.5578                                   | P=0.1235                                       |
| TS(Mod)<br>N2<br>1.5-fold<br>SDR               |                               |                                   |                                  | <b>P=0.0008</b><br><b>P&lt;0.0001</b> | <b>P=0.0002</b>                         | <b>P&lt;0.0001</b>                          | <b>P&lt;0.0001</b>                         | <b>P&lt;0.0001</b>                             |
| TS(Mod)<br>N2<br>1.5-fold<br>Out-SDR           |                               |                                   |                                  |                                       | P=0.7650                                | P=0.2868                                    | P=0.7589                                   | P=0.1593                                       |
| TS(Mod)<br><i>pha-1</i><br>Comma<br>SDR        |                               |                                   |                                  |                                       |                                         | <b>P=0.3737</b><br><b>P=0.1637</b>          | <b>P=0.9745</b>                            | <b>P=0.3132</b>                                |
| TS(Mod)<br><i>pha-1</i><br>Comma<br>Out-SDR    |                               |                                   |                                  |                                       |                                         |                                             | P=0.3853                                   | P=0.8861                                       |
| TS(Mod)<br><i>pha-1</i><br>1.5-fold<br>SDR     |                               |                                   |                                  |                                       |                                         |                                             |                                            | <b>P=0.2421</b><br><b>P=0.0291</b>             |
| TS(Mod)<br><i>pha-1</i><br>1.5-fold<br>Out-SDR |                               |                                   |                                  |                                       |                                         |                                             |                                            |                                                |

P-values in bold are derived from a 2-tailed non-paired T-test. Non-bold P-values are derived from a 2-tailed paired T-test (where applicable). Yellow background indicates very high statistical significance ( $P < 0.001$ ). Green background indicates marginal statistical significance ( $0.01 < P < 0.05$ ). Tests were carried out in the N2 (wild-type) strain or in *pha-1(tm3671)* mutants, as indicated. All tests were performed with the UNC-70(TSMod).

## B. T-test values for controls.

|                                                | No Force<br>cont.<br>N2<br>Comma<br>SDR | No Force<br>cont.<br>N2<br>Comma<br>Out-SDR | No Force<br>cont.<br>N2<br>1.5-fold<br>SDR | No Force<br>cont.<br>N2<br>1.5-fold<br>Out-SDR | 5aa-cont.<br>N2<br>1.5-fold<br>SDR | 5aa-cont.<br>N2<br>1.5-fold<br>Out-SDR | TRAF-cont.<br>N2<br>1.5-fold<br>SDR | TRAF-cont.<br>N2<br>1.5-fold<br>Out-SDR |
|------------------------------------------------|-----------------------------------------|---------------------------------------------|--------------------------------------------|------------------------------------------------|------------------------------------|----------------------------------------|-------------------------------------|-----------------------------------------|
| No Force<br>cont.<br>N2<br>Comma<br>SDR        |                                         | <b>P=0.6648</b><br>P=0.1508                 | <b>P=0.1841</b>                            | <b>P=0.3688</b>                                |                                    |                                        |                                     |                                         |
| No Force<br>cont.<br>N2<br>Comma<br>Out-SDR    |                                         |                                             | <b>P=0.0726</b>                            | <b>P=0.1058</b>                                |                                    |                                        |                                     |                                         |
| No Force<br>cont.<br>N2<br>1.5-fold<br>SDR     |                                         |                                             |                                            | <b>P=0.6630</b><br>P=0.0140                    |                                    |                                        |                                     |                                         |
| No Force<br>cont.<br>N2<br>1.5-fold<br>Out-SDR |                                         |                                             |                                            |                                                |                                    |                                        |                                     |                                         |
| 5aa-cont.<br>N2<br>1.5-fold<br>SDR             |                                         |                                             |                                            |                                                |                                    | <b>P=0.6618</b><br>P=0.0875            |                                     |                                         |
| 5aa-cont.<br>N2<br>1.5-fold<br>Out-SDR         |                                         |                                             |                                            |                                                |                                    |                                        |                                     |                                         |
| TRAF-cont.<br>N2<br>1.5-fold<br>SDR            |                                         |                                             |                                            |                                                |                                    |                                        |                                     | <b>P=0.2452</b><br>P=0.1080             |
| TRAF-cont.<br>N2<br>1.5-fold<br>Out-SDR        |                                         |                                             |                                            |                                                |                                    |                                        |                                     |                                         |

P-values in bold are derived from a 2-tailed non-paired T-test. Non-bold P-values are derived from a 2-tailed paired T-test (where applicable). All tests were carried out in the N2 (wild-type) strain. Green background indicates marginal statistical significance ( $0.01 < P < 0.05$ ). Tests were performed with the UNC-70(N-TSMod) (No Force Control), the 5aa spacer, or the TRAF spacer.

### C. T-test values for UNC-70(TSMod) versus UNC-70(N-TSMod).

|                                                | No Force<br>cont.<br>N2<br>Comma<br>SDR | No Force<br>cont.<br>N2<br>Comma<br>Out-SDR | No Force<br>cont.<br>N2<br>1.5-fold<br>SDR | No Force<br>cont.<br>N2<br>1.5-fold<br>Out-SDR | TS(Mod)<br>N2<br>Comma<br>SDR | TS(Mod)<br>N2<br>Comma<br>Out-SDR | TS(Mod)<br>N2<br>1.5-fold<br>SDR | TS(Mod)<br>N2<br>1.5-fold<br>Out-SDR |
|------------------------------------------------|-----------------------------------------|---------------------------------------------|--------------------------------------------|------------------------------------------------|-------------------------------|-----------------------------------|----------------------------------|--------------------------------------|
| No Force<br>cont.<br>N2<br>Comma<br>SDR        |                                         |                                             |                                            |                                                | <b>P=0.0149</b>               | <b>P=0.0087</b>                   | <b>P&lt;0.0001</b>               | <b>P=0.0079</b>                      |
| No Force<br>cont.<br>N2<br>Comma<br>Out-SDR    |                                         |                                             |                                            |                                                | <b>P=0.0049</b>               | <b>P=0.0032</b>                   | <b>P&lt;0.0001</b>               | <b>P=0.0025</b>                      |
| No Force<br>cont.<br>N2<br>1.5-fold<br>SDR     |                                         |                                             |                                            |                                                | P=0.1168                      | <b>P=0.0415</b>                   | <b>P&lt;0.0001</b>               | P=0.0529                             |
| No Force<br>cont.<br>N2<br>1.5-fold<br>Out-SDR |                                         |                                             |                                            |                                                | P=0.0736                      | <b>P=0.0434</b>                   | <b>P&lt;0.0001</b>               | <b>P=0.0307</b>                      |
| TS(Mod)<br>N2<br>Comma<br>SDR                  |                                         |                                             |                                            |                                                |                               |                                   |                                  |                                      |
| TS(Mod)<br>N2<br>Comma<br>Out-SDR              |                                         |                                             |                                            |                                                |                               |                                   |                                  |                                      |
| TS(Mod)<br>N2<br>1.5-fold<br>SDR               |                                         |                                             |                                            |                                                |                               |                                   |                                  |                                      |
| TS(Mod)<br>N2<br>1.5-fold<br>Out-SDR           |                                         |                                             |                                            |                                                |                               |                                   |                                  |                                      |

P-values in bold are derived from a 2-tailed non-paired T-test.). All tests were carried out in the N2 (wild-type) strain. Green background indicates marginal statistical significance ( $0.01 < P < 0.05$ ). Red background indicates high statistical significance ( $P < 0.01$ ). Yellow background indicates very high statistical significance ( $P < 0.001$ ). The detected differences between UNC-70(TSMod) and UNC-70(N-TSMod) (No Force control) in SDR and Out-SDR regions in early comma stages and in the Out-SDR region at the 1.5-fold stage may indicate that these regions are normally under low-to-moderate levels of tension that are independent of pharyngeal attachment, which are detected by the UNC-70(TSMod).

#### D. Data used for calculations.

| Strain Background    | TS module       | Stage       | Region  | Mean   | SD     | N  |
|----------------------|-----------------|-------------|---------|--------|--------|----|
| N2                   | UNC-70(TSMod)   | Early Comma | SDR     | 0.2591 | 0.0673 | 27 |
| N2                   | UNC-70(TSMod)   | Early Comma | Non-SDR | 0.2467 | 0.0858 | 27 |
| N2                   | UNC-70(TSMod)   | 1.5-Fold    | SDR     | 0.1973 | 0.0517 | 35 |
| N2                   | UNC-70(TSMod)   | 1.5-Fold    | Non-SDR | 0.2525 | 0.0772 | 35 |
| <i>pha-1(tm3671)</i> | UNC-70(TSMod)   | Early Comma | SDR     | 0.2591 | 0.0630 | 20 |
| <i>pha-1(tm3671)</i> | UNC-70(TSMod)   | Early Comma | Non-SDR | 0.2762 | 0.0764 | 20 |
| <i>pha-1(tm3671)</i> | UNC-70(TSMod)   | 1.5-Fold    | SDR     | 0.2585 | 0.0664 | 31 |
| <i>pha-1(tm3671)</i> | UNC-70(TSMod)   | 1.5-Fold    | Non-SDR | 0.2799 | 0.0759 | 31 |
| N2                   | UNC-70(N-TSMod) | Early Comma | SDR     | 0.3048 | 0.0593 | 23 |
| N2                   | UNC-70(N-TSMod) | Early Comma | Non-SDR | 0.3125 | 0.0604 | 23 |
| N2                   | UNC-70(N-TSMod) | 1.5-Fold    | SDR     | 0.2840 | 0.0576 | 37 |
| N2                   | UNC-70(N-TSMod) | 1.5-Fold    | Non-SDR | 0.2901 | 0.0622 | 37 |
| N2                   | UNC-70(TRAF)    | 1.5-Fold    | SDR     | 0.1068 | 0.0548 | 11 |
| N2                   | UNC-70(TRAF)    | 1.5-Fold    | Non-SDR | 0.1337 | 0.0455 | 11 |
| N2                   | UNC-70(5aa)     | 1.5-Fold    | SDR     | 0.4241 | 0.0801 | 21 |
| N2                   | UNC-70(5aa)     | 1.5-Fold    | Non-SDR | 0.4356 | 0.0888 | 21 |
