# Supplementary material for: FBN-1, a fibrillin-related protein, is required for resistance of the epidermis to mechanical deformation during C. elegans embryogenesis
Source: eLife journal article supplement (doi:10.7554/elife.06565), 2015-03-23
Supplement: supp [file elife_poa_e06565_Supplementary_File_5.xlsx]

## Sheet: Gene Regions
	Transcript	Gene	Chr	Region	Start	End	Difference	Probes	D/25	N2 avg	N2 SD	mec-8 avg	mec-8 SD	Ratio	SD ratio	P-value	AS
	Introns upregulated in mec-8
	W01F3.3a	mlt-11	V	intron 9	20666488	20669646	3158	117	126.32	363.63	56.357	2218.64	277.163	6.10136	0.112286	0	yes
	ZK783.1(b,d,e)	fbn-1	III	intron 14	7633800	7636241	2441	91	97.64	258.74	36.113	1209.93	145.245	4.67623	0.090244	0	yes
	ZK783.1e	fbn-1	III	intron 15	7636401	7637726	1325	46	53	257.989	36.436	983.494	126.234	3.81215	0.107267	0	yes
	ZK180.5c	ZK180.5	IV	intron 3	4515469	4515968	499	18	19.96	483.654	87.773	1458.07	193.406	3.0147	0.159727	0	yes
	ZK180.5b	ZK180.5	IV	intron 3	4515469	4515674	205	7	8.2	594.485	109.99	1485.26	208.329	2.4984	0.219245	8.23608e-12	yes
	W06B11.2	puf-9	X	intron 8	5844215	5844629	414	14	16.56	881.087	100.642	1633.39	179.467	1.85384	0.0785261	0	no
	F26H11.2e	nurf-1	II	intron 1	14404578	14406267	1689	54	67.56	1197.04	200.908	2184.09	440.767	1.82458	0.0651724	0	yes
	F26H11.2 (d,h)	nurf-1	II	intron 7	14403592	14406267	2675	85	107	838.899	160.963	1466.5	351.732	1.74813	0.0582389	0	yes
	F26H11.2c	nurf-1	II	intron 20	14403592	14406267	2675	85	107	838.899	160.963	1466.5	351.732	1.74813	0.0582389	0	yes
	Y47D3B.9	bed-2	III	intron 8	11463922	11464073	151	4	6.04	140.667	16.126	240.694	25.759	1.71109	0.134175	1.15967e-07	no
	M05D6.3	M05D6.3	II	intron 1	8475976	8476406	430	7	17.2	152.508	22.302	246.794	29.991	1.61824	0.116295	1.06014e-07	no
	W09B6.1b	pod-2	II	intron 4	1147573	1152022	4449	154	177.96	840.775	105.782	1352.83	152.447	1.60903	0.0218997	0	yes
	F26H11.2g	nurf-1	II	intron 1	14405724	14406549	825	23	33	1655.26	209.218	2604.59	421.329	1.57352	0.0673556	0	yes
	T07A5.6b	unc-69	III	intron 3	10319413	10319669	256	8	10.24	1257	152.924	1973.49	221.058	1.57	0.0917943	5.31298e-10	yes
	C25A11.4d	ajm-1	X	intron 12	9110618	9111668	1050	38	42	365.526	74.821	566.92	93.612	1.55097	0.0661693	0	yes
	C25A11.4a	ajm-1	X	intron 13	9110618	9111668	1050	38	42	365.526	74.821	566.92	93.612	1.55097	0.0661693	0	yes
	H19M22.2c	let-805	III	intron 6	2679280	2680403	1123	42	44.92	327.315	48.535	496.753	66.087	1.51766	0.0466522	0	yes
	H19M22.2a	let-805	III	intron 23	2679280	2680403	1123	42	44.92	327.315	48.535	496.753	66.087	1.51766	0.0466522	0	yes
	M05D6.4	lact-4	II	intron 2	8478730	8479273	543	19	21.72	158.558	26.108	238.591	44.521	1.50476	0.0859106	4.21934e-09	no
	Exons downregulated in mec-8
	Y102A5C.22	srx-54	V	exon 5	16975850	16976022	172	4	6.88	950.264	681.195	247.403	28.222	0.260352	0.0944905	4.88498e-15	no
	F41H10.10	htp-1	IV	exon 2	5391287	5391434	147	5	5.88	680.399	384.583	196.133	24.259	0.288262	0.0745908	0	no
	W05H9.1(a,b)	W05H9.1	X	exon 2	6272358	6272489	131	4	5.24	1405.79	155.837	438.153	55.863	0.311677	0.0263288	0	yes
	C03B1.2	C03B1.2	X	exon 1	6367570	6367678	108	3	4.32	245.686	79.092	84.481	13.057	0.343858	0.0708941	0	no
	W05H9.1(a.1, b.1)	W05H9.1	X	exon 1	6272046	6272310	264	9	10.56	1295.36	137.721	445.488	46.694	0.34391	0.017115	0	yes
	W05H9.1(a,b)	W05H9.1	X	exon 5	6273024	6273119	95	3	3.8	689.704	66.927	275.722	31.709	0.399769	0.0347301	0	yes
	W05H9.1a	W05H9.1	X	exon 6	6273164	6273348	184	6	7.36	956.092	119.273	396.945	42.787	0.415174	0.0279442	0	yes
	W05H9.1(a,b)	W05H9.1	X	exon 4	6272739	6272975	236	8	9.44	805.125	90.501	336.555	41.34	0.418016	0.0246075	0	yes
	AC3.8	ugt-2	V	exon 6	10399633	10399740	107	3	4.28	327.963	82.397	137.315	16.476	0.418691	0.0673028	0	no
	T11F8.3a	rme-2	IV	exon 1	5469982	5470072	90	3	3.6	1118.04	169.779	469.722	48.635	0.42013	0.0445815	0	no
	F58E6.13c	F58E6.13	V	exon 7	9748278	9748439	161	5	6.44	453.722	53.62	190.667	24.559	0.420229	0.0328516	0	yes
	T26C12.4	gcy-23	IV	exon 7	3284291	3284506	215	7	8.6	496.58	279.123	212.103	25.008	0.427128	0.0927182	6.4657e-10	yes
	C17G10.7	C17G10.7	II	exon 2	5607593	5607679	86	3	3.44	156.093	24.689	66.722	8.929	0.42745	0.0511312	0	no
	C55B7.11	C55B7.11	I	exon 1	6513703	6513843	140	4	5.6	210.25	63.4	91.069	13.223	0.433146	0.0724832	5.32907e-15	no
	T15B7.11	dmsr-14	V	exon 5	6816020	6816122	102	3	4.08	211.87	58.576	91.852	11.247	0.43353	0.0756837	7.17204e-14	no
	C25A1.1	C25A1.1	I	exon 1	10162376	10162472	96	3	3.84	6867.36	2219.12	2983.74	304.109	0.434482	0.0849958	2.86224e-11	no
	T25G3.2.2	chs-1	I	exon 8	7558465	7558867	402	14	16.08	565.376	73.952	250.984	29.804	0.443924	0.0209601	0	yes
	T25G3.2.1	chs-1	I	exon 8	7558465	7558867	402	14	16.08	565.376	73.952	250.984	29.804	0.443924	0.0209601	0	yes
	T25G3.2.2	chs-1	I	exon 7	7558037	7558419	382	14	15.28	524.06	79.884	237.218	27.755	0.452654	0.0232469	0	yes
	T25G3.2.1	chs-1	I	exon 7	7558037	7558419	382	14	15.28	524.06	79.884	237.218	27.755	0.452654	0.0232469	0	yes
	T11F8.3a	rme-2	IV	exon 5	5471855	5472063	208	8	8.32	910.896	117.252	412.348	51.644	0.452684	0.0287442	0	yes
	T11F8.3b	rme-2	IV	exon 4	5471855	5472063	208	8	8.32	910.896	117.252	412.348	51.644	0.452684	0.0287442	0	yes
	T11F8.3a	rme-2	IV	exon 3	5470720	5471569	849	32	33.96	1018.46	139.107	461.361	51.181	0.453	0.014091	0	yes
	T11F8.3b	rme-2	IV	exon 2	5470720	5471569	849	32	33.96	1018.46	139.107	461.361	51.181	0.453	0.014091	0	yes
	K07E8.7	K07E8.7	II	exon 3	650070	650190	120	3	4.8	352.074	67.303	160.018	19.394	0.454501	0.0593943	0	no
	H02I12.1	cbd-1	IV	exon 2	11373058	11373152	94	3	3.76	3980.96	552.569	1811.17	170.78	0.454957	0.0440764	0	no
	W05H9.1(a,b)	W05H9.1	X	exon 7	6273399	6273726	327	12	13.08	720.333	99.983	328.764	38.472	0.456406	0.0239194	0	yes
	T11F8.3a	rme-2	IV	exon 2	5470121	5470672	551	20	22.04	860.511	110.755	393.455	42.197	0.457234	0.0171288	0	yes
	Y62F5A.9	Y62F5A.9	II	exon 2	11538354	11538478	124	4	4.96	457.542	57.088	213.722	27.617	0.467109	0.0419524	0	no
	D2089.3	D2089.3	II	exon 3	10663769	10663892	123	3	4.92	378.537	82.907	178	20.009	0.470231	0.0668355	2.22045e-15	no
	H02I12.1	cbd-1	IV	exon 8	11376134	11376561	427	15	17.08	5560.7	669.821	2617.32	282.636	0.470682	0.0196603	0	no
	Y40B1B.8	Y40B1B.8	I	exon 3	13434276	13434571	295	9	11.8	1909.83	1048.85	905.995	105.187	0.474384	0.0887606	3.18581e-09	no
	Y40B1B.8	Y40B1B.8	I	exon 9	13434276	13434587	311	9	12.44	1909.83	1048.85	905.995	105.187	0.474384	0.0887606	3.18581e-09	no
	F14F8.6	srw-44	V	exon 1	16680082	16680185	103	3	4.12	196.574	35.144	93.5	12.929	0.475648	0.062068	0	no
	H02I12.1	cbd-1	IV	exon 7	11375750	11376085	335	12	13.4	3488.71	407.898	1668.17	169.436	0.478162	0.0213781	0	no
	T21B4.8	srh-61	II	exon 2	12515736	12515926	190	7	7.6	226	71.907	108.159	13.613	0.47858	0.0618923	0	no
	F14B8.7	otpl-3	X	exon 2	6924094	6924220	126	4	5.04	209.736	61.922	100.389	11.955	0.478645	0.0761884	7.75624e-12	no
	F20B6.3	mrp-6	X	exon 13	4180167	4180287	120	4	4.8	292.542	40.421	141.417	18.851	0.483408	0.0464049	0	no
	R10D12.8	R10D12.8	V	exon 1	13952915	13953027	112	3	4.48	120.019	16.493	58.037	6.182	0.483565	0.0485418	0	no
	ZK484.2b	haf-9	I	exon 5	6082990	6083107	117	4	4.68	332.167	67.847	161.403	21.876	0.485909	0.0595564	0	no
	ZK484.2a	haf-9	I	exon 5	6082990	6083107	117	4	4.68	332.167	67.847	161.403	21.876	0.485909	0.0595564	0	no
	H02I12.1	cbd-1	IV	exon 4	11373800	11374408	608	22	24.32	3881.8	519.476	1890.11	240.654	0.486914	0.0191754	0	no
	H02I12.1	cbd-1	IV	exon 6	11375424	11375702	278	10	11.12	5139.49	607.801	2508.1	245.352	0.488006	0.0236847	0	no
	B0507.5a	B0507.5	V	exon 2	8753732	8753857	125	3	5	221.5	50.345	108.722	14.912	0.490844	0.0752308	1.30649e-11	yes
	R31.3	osm-6	V	exon 2	11927019	11927134	115	3	4.6	264.185	79.319	130.056	15.636	0.492291	0.091923	3.32887e-08	no
	T25G3.2.2	chs-1	I	exon 2	7555151	7555292	141	5	5.64	386.701	52.031	191.766	22.094	0.495903	0.0392848	0	yes
	T25G3.2.1	chs-1	I	exon 2	7555151	7555292	141	5	5.64	386.701	52.031	191.766	22.094	0.495903	0.0392848	0	yes
	H02I12.1	cbd-1	IV	exon 3	11373198	11373753	555	21	22.2	5856.73	701.17	2952.53	309.719	0.504125	0.0175108	0	no
	H02I12.1	cbd-1	IV	exon 5	11374455	11375375	920	35	36.8	4923.89	582.265	2485.56	272.931	0.504795	0.0137693	0	no
	T11F8.3a	rme-2	IV	exon 4	5471615	5471805	190	7	7.6	644.412	78.313	325.484	31.914	0.505087	0.0298097	0	yes
	T11F8.3b	rme-2	IV	exon 3	5471615	5471805	190	7	7.6	644.412	78.313	325.484	31.914	0.505087	0.0298097	0	yes
	B0244.8	egg-1	III	exon 4	5729043	5729754	711	26	28.44	833.417	120.303	427.342	45.207	0.512759	0.0179965	0	no
	C41D11.5	C41D11.5	I	exon 2	4450631	4450715	84	3	3.36	327.982	60.033	168.259	22	0.513013	0.0666249	2.68452e-13	no
	T12G3.6b	T12G3.6	IV	exon 1	12031118	12031242	124	4	4.96	214	57.08	110.028	12.128	0.51415	0.0741937	5.81537e-11	yes
	ZC132.3	ZC132.3	V	exon 2	4297262	4297660	398	4	15.92	300.153	70.954	155.111	18.44	0.516773	0.0683698	1.57363e-12	no
	F56D6.2	clec-67	IV	exon 7	3924073	3924170	97	3	3.88	259.5	23.744	135.018	17.634	0.520301	0.0479032	0	no
	F26D11.4	F26D11.4	V	exon 5	7947039	7947135	96	3	3.84	140.555	21.607	73.278	10.977	0.521348	0.0646076	1.27676e-13	no
	F48F7.8	arrd-27	X	exon 3	13981167	13981550	383	4	15.32	860.985	235.859	450.86	84.573	0.523656	0.0869294	4.26139e-08	no
	H02I12.1	cbd-1	IV	exon 9	11376608	11376940	332	12	13.28	4714.25	585.095	2470.61	289.822	0.524074	0.0258364	0	no
	T11A5.3	srab-18	V	exon 1	9871019	9871239	220	3	8.8	357.518	86.539	187.556	20.052	0.524606	0.0801468	3.00093e-09	no
	B0244.8	egg-1	III	exon 3	5728357	5728998	641	23	25.64	799.169	110.581	420.029	46.917	0.525582	0.0194885	0	no
	T12A2.2.2	stt-3	III	exon 6	6251403	6251540	137	3	5.48	980.24	125.064	518.036	68.598	0.528479	0.0561058	0	no
	C03C10.2	C03C10.2	III	exon 3	4092492	4092755	263	9	10.52	309.315	140.652	163.698	18.003	0.529227	0.0825297	1.16836e-08	no
	Y59H11AR.4	Y59H11AR.4	IV	exon 5	8599993	8600083	90	3	3.6	197.945	22.359	105.315	13.414	0.532042	0.0522938	0	no
	C03E10.6	clec-222	V	exon 2	11271322	11271432	110	3	4.4	1210.65	208.443	645.185	58.826	0.532925	0.0599451	6.66134e-15	no
	Y48G1C.2b	csk-1	I	exon 6	75951	76112	161	5	6.44	2450.11	287.095	1307.18	154.535	0.533518	0.0397149	0	yes
	Y48G1C.2b	csk-1	I	exon 9	75951	76112	161	5	6.44	2450.11	287.095	1307.18	154.535	0.533518	0.0397149	0	yes
	C03A7.10	srt-65	V	exon 5	5172081	5172198	117	3	4.68	252.759	66.051	135.667	17.699	0.536744	0.090511	3.08425e-07	no
	T25G3.2.2	chs-1	I	exon 9	7558921	7559175	254	9	10.16	395.543	57.154	212.506	25.394	0.537251	0.0335793	0	yes
	T25G3.2.1	chs-1	I	exon 9	7558921	7559175	254	9	10.16	395.543	57.154	212.506	25.394	0.537251	0.0335793	0	yes
	F01G10.2	ech-8	IV	exon 4	10237974	10238093	119	3	4.76	309.981	75.371	166.629	19.728	0.537546	0.0839317	3.59065e-08	no
	F46A9.6.1	mec-8	I	exon 2	9443028	9443375	347	12	13.88	802.343	96.105	432.884	48.422	0.539525	0.0255254	0	yes
	F46A9.6.2	mec-8	I	exon 3	9443028	9443375	347	12	13.88	802.343	96.105	432.884	48.422	0.539525	0.0255254	0	yes
	T16G12.1	T16G12.1	III	exon 16	10044665	10044779	114	3	4.56	278.426	59.216	150.426	19.082	0.540273	0.0772452	2.65643e-09	no
	F14E5.6	acp-4	II	exon 4	8434026	8434118	92	3	3.68	122.815	19.914	66.389	8.373	0.540561	0.0641104	7.70051e-13	no
	C46F4.1a	egl-6	X	exon 2	5932957	5933070	113	3	4.52	280.815	39.988	152.444	18.926	0.542863	0.0592119	1.15463e-14	yes
	C46F4.1b	egl-6	X	exon 3	5932957	5933070	113	3	4.52	280.815	39.988	152.444	18.926	0.542863	0.0592119	1.15463e-14	yes
	T25G3.2.2	chs-1	I	exon 3	7555337	7555938	601	22	24.04	576.457	76.455	313.932	36.233	0.544589	0.0204135	0	yes
	T25G3.2.1	chs-1	I	exon 3	7555337	7555938	601	22	24.04	576.457	76.455	313.932	36.233	0.544589	0.0204135	0	yes
	T28B4.2	T28B4.2	X	exon 9	6581959	6582083	124	4	4.96	267.875	71.002	145.903	14.93	0.544668	0.0773764	3.98944e-09	no
	T25G3.2.2	chs-1	I	exon 4	7555983	7556074	91	3	3.64	307.852	29.499	169.5	20.289	0.550589	0.0487406	0	yes
	T25G3.2.1	chs-1	I	exon 4	7555983	7556074	91	3	3.64	307.852	29.499	169.5	20.289	0.550589	0.0487406	0	yes
	F46A9.6.1	mec-8	I	exon 4	9441000	9441509	509	18	20.36	498.58	70.681	274.963	35.306	0.551492	0.0248629	0	yes
	F46A9.6.2	mec-8	I	exon 5	9441000	9441509	509	18	20.36	498.58	70.681	274.963	35.306	0.551492	0.0248629	0	yes
	F57B10.4	F57B10.4	I	exon 3	6568708	6568833	125	4	5	280.778	41.35	154.847	17.187	0.551493	0.0508509	0	no
	K01C8.3b	tdc-1	II	exon 8	8272643	8272856	213	7	8.52	1558.18	235.658	859.619	84.198	0.551681	0.0375717	0	yes
	K11D12.5	swt-7	V	exon 4	5029438	5029557	119	3	4.76	280.426	63.35	154.796	25.631	0.552003	0.0892643	5.2003e-07	no
	F53B2.8	F53B2.8	IV	exon 1	12527170	12527311	141	4	5.64	232.139	55.321	128.167	15.679	0.552113	0.0739486	1.38912e-09	no
	F52H3.6	F52H3.6	II	exon 2	10027557	10027684	127	3	5.08	210.371	28.903	116.574	13.486	0.554135	0.0574624	8.43769e-15	no
	Y48G1C.2a	csk-1	I	exon 5	74625	74808	183	5	7.32	2014.67	233.762	1117.28	111.579	0.554572	0.037968	0	yes
	Y48G1C.2b	csk-1	I	exon 7	74625	74808	183	5	7.32	2014.67	233.762	1117.28	111.579	0.554572	0.037968	0	yes
	Y48G1C.2a	csk-1	I	exon 7	73605	73766	161	5	6.44	1880.71	230.393	1043.16	111.971	0.55466	0.0404017	0	yes
	Y48G1C.2b	csk-1	I	exon 6	73605	73766	161	5	6.44	1880.71	230.393	1043.16	111.971	0.55466	0.0404017	0	yes
	Y5H2B.1	Y5H2B.1	V	exon 1	2207008	2207153	145	4	5.8	184.903	52.962	103.236	14.908	0.558325	0.0895482	8.1285e-07	no
	T22C8.2	chhy-1	II	exon 4	8616641	8616756	115	4	4.6	238.153	56.024	133.028	13.216	0.558582	0.0713202	6.04547e-10	no
	F53B7.4	F53B7.4	V	exon 3	11001797	11001935	138	4	5.52	229.361	51.624	128.319	17.216	0.559463	0.0732984	1.85307e-09	no
	F59E11.10a	nhr-195	V	exon 2	8971235	8971330	95	3	3.8	298	33.609	166.963	18.619	0.560279	0.051305	0	yes
	F59E11.10b	nhr-195	V	exon 5	8971235	8971330	95	3	3.8	298	33.609	166.963	18.619	0.560279	0.051305	0	yes
	K01C8.3b	tdc-1	II	exon 6	8272038	8272258	220	8	8.8	1342.46	199.142	755.298	89.263	0.562623	0.0377274	0	yes
	K01C8.3a	tdc-1	II	exon 6	8272038	8272258	220	8	8.8	1342.46	199.142	755.298	89.263	0.562623	0.0377274	0	yes
	T27C10.1	srt-61	I	exon 2	10904885	10905034	149	5	5.96	212.289	64.398	119.511	16.965	0.562964	0.0843215	2.18374e-07	no
	F59B1.7	srx-41	V	exon 2	3636584	3636744	160	4	6.4	410.527	46.874	231.305	19.251	0.563434	0.0398049	0	no
	F44G4.3	F44G4.3	II	exon 3	8997097	8997196	99	3	3.96	298.352	71.061	168.296	21.495	0.564085	0.0880176	7.32347e-07	no
	K07A12.4b	K07A12.4	I	exon 10	8688440	8688545	105	3	4.2	289.908	64.458	163.796	19.775	0.564993	0.0825293	1.35725e-07	yes
	K07A12.4a	K07A12.4	I	exon 9	8688440	8688545	105	3	4.2	289.908	64.458	163.796	19.775	0.564993	0.0825293	1.35725e-07	yes
	T13F2.4	T13F2.4	IV	exon 3	9790365	9790523	158	6	6.32	177.472	50.083	100.463	12.761	0.566078	0.071519	1.30139e-09	no
	F10F2.5	clec-154	III	pseudogene	4639658	4639761	103	3	4.12	292.963	57.837	166.426	18.656	0.568079	0.0744601	6.6036e-09	no
	H43E16.1	H43E16.1	II	exon 7	6678592	6678731	139	4	5.56	221.834	53.916	126.097	19.172	0.56843	0.0814801	1.17957e-07	no
	Y48G1C.2a	csk-1	I	exon 6	75171	75490	319	11	12.76	2461.93	256.224	1402.26	146.325	0.569577	0.0253098	0	yes
	Y48G1C.2b	csk-1	I	exon 8	75171	75490	319	11	12.76	2461.93	256.224	1402.26	146.325	0.569577	0.0253098	0	yes
	B0478.3	B0478.3	IV	exon 1	6964312	6964546	234	8	9.36	197.417	47.379	112.528	13.007	0.570002	0.0536825	1.11022e-15	no
	T05A7.8	sre-40	II	exon 1	4683422	4683716	294	10	11.76	208.134	58.158	118.667	15.374	0.570147	0.0555311	9.99201e-15	no
	T12F5.2	T12F5.2	I	exon 5	3732358	3732706	348	4	13.92	446.653	54.667	255.347	30.98	0.57169	0.0492614	0	no
	C18H2.5	C18H2.5	III	exon 4	7690730	7690844	114	3	4.56	189.611	23.923	108.592	13.157	0.572709	0.0578392	1.49658e-13	no
	K09C4.8	sul-1	X	exon 4	3270328	3270441	113	4	4.52	257.709	64.543	147.639	17.301	0.57289	0.0792045	6.94882e-08	no
	C07G2.1b	cpg-1	III	exon 1	4489326	4489579	253	8	10.12	6693.2	803.881	3836.68	398.986	0.573221	0.0321971	0	yes
	F42G2.8	fbxa-4	II	exon 2	2414451	2415069	618	23	24.72	261.684	164.904	150.415	20.352	0.574796	0.0772487	3.70538e-08	no
	T14B4.9	T14B4.9	II	exon 3	6733014	6733120	106	3	4.24	282.907	53.354	162.685	20.383	0.575048	0.0751715	1.57572e-08	no
	R06C7.4	cpg-3	I	exon 2	7245082	7245461	379	10	15.16	1236.78	163.957	712.09	66.092	0.57576	0.0294644	0	no
	C46C11.2b	C46C11.2	X	exon 7	4634420	4634571	151	5	6.04	337.611	62.038	194.411	21.888	0.575843	0.0554976	2.13163e-14	no
	C46C11.2a	C46C11.2	X	exon 6	4634420	4634571	151	5	6.04	337.611	62.038	194.411	21.888	0.575843	0.0554976	2.13163e-14	yes
	F49E12.1	F49E12.1	II	exon 5	8403506	8403615	109	3	4.36	243.537	42.68	140.296	15.706	0.576077	0.0691655	8.83687e-10	no
	Y119D3B.8	fbxa-61	III	exon 1	1239274	1239401	127	4	5.08	276.278	52.285	159.5	18.32	0.577317	0.063902	3.72697e-11	no
	B0238.1	B0238.1	V	exon 4	5242039	5242372	333	5	13.32	249.711	51.711	144.178	16.213	0.577379	0.0608465	3.76632e-12	no
	C07G2.1a	cpg-1	III	exon 4	4491042	4491348	306	11	12.24	3792.46	519.486	2195.59	255.534	0.578936	0.0313757	0	yes
	C07G2.1a	cpg-1	III	exon 1	4489324	4489579	255	9	10.2	6364.8	767.025	3692.73	382.19	0.58018	0.0307213	0	yes
	C06E7.7	srv-17	IV	exon 5	5869191	5869300	109	3	4.36	238.759	27.834	138.537	16.428	0.580238	0.0557069	4.88498e-14	no
	C39H7.8	srsx-15	IV	exon 3	5623075	5623329	254	6	10.16	180.611	44.167	104.907	12.487	0.580845	0.0644925	8.07021e-11	no
	T11F8.3a	rme-2	IV	exon 6	5472108	5472909	801	30	32.04	635.848	74.193	370.2	39.972	0.582215	0.0168988	0	yes
	T11F8.3b	rme-2	IV	exon 5	5472108	5472909	801	30	32.04	635.848	74.193	370.2	39.972	0.582215	0.0168988	0	yes
	T22D1.5	T22D1.5	IV	exon 4	6904510	6904625	115	3	4.6	1606.81	191.055	935.611	91.137	0.582277	0.0516736	6.66134e-16	no
	T25G3.2.2	chs-1	I	exon 6	7556519	7557990	1471	55	58.84	502.408	68.278	292.817	34.928	0.582827	0.0142107	0	yes
	T25G3.2.1	chs-1	I	exon 6	7556519	7557990	1471	55	58.84	502.408	68.278	292.817	34.928	0.582827	0.0142107	0	yes
	F16F9.4	F16F9.4	X	exon 2	8462958	8463065	107	3	4.28	229.019	31.06	133.76	15.715	0.584056	0.0605059	6.22369e-12	no
	C07G2.1a	cpg-1	III	exon 3	4490424	4490994	570	18	22.8	6218.59	706.715	3634.66	369.076	0.584482	0.0209955	0	yes
	B0024.6	gcy-6	V	exon 10	10311978	10312113	135	4	5.4	167.18	24.156	97.75	13.455	0.584699	0.0583414	1.09135e-12	no
	T25G3.2.2	chs-1	I	exon 5	7556123	7556470	347	12	13.88	518.329	56.391	303.449	33.547	0.585437	0.0262131	0	yes
	T25G3.2.1	chs-1	I	exon 5	7556123	7556470	347	12	13.88	518.329	56.391	303.449	33.547	0.585437	0.0262131	0	yes
	F35C11.5	F35C11.5	II	exon 3	8253959	8254053	94	3	3.76	1536.96	195.866	900.409	93.07	0.585837	0.0554995	8.4821e-14	no
	C39B10.1	C39B10.1	X	exon 8	10461893	10462010	117	4	4.68	425.416	67.423	249.417	26.807	0.58629	0.0561354	1.70752e-13	no
	F42A10.9	F42A10.9	III	exon 1	6168535	6168633	98	3	3.92	775.5	96.172	454.703	40.692	0.586335	0.0517703	1.33227e-15	no
	F46A9.6.1	mec-8	I	exon 1	9443904	9444218	314	11	12.56	580.637	65.915	340.707	38.249	0.586781	0.0282467	0	yes
	F46A9.6.2	mec-8	I	exon 2	9443904	9444220	316	11	12.64	580.637	65.915	340.707	38.249	0.586781	0.0282467	0	yes
	D1081.7a	D1081.7	I	exon 2	8487750	8487883	133	4	5.32	1762.17	188.268	1035.28	101.466	0.587502	0.042589	0	no
	D1081.7b	D1081.7	I	exon 2	8487750	8487883	133	4	5.32	1762.17	188.268	1035.28	101.466	0.587502	0.042589	0	no
	Y48G1C.2a	csk-1	I	exon 8	76949	77153	204	7	8.16	4157.13	458.34	2442.57	313.938	0.587563	0.0376062	0	yes
	Y48G1C.2b	csk-1	I	exon 10	76949	77153	204	7	8.16	4157.13	458.34	2442.57	313.938	0.587563	0.0376062	0	yes
	T14G10.8	T14G10.8	IV	exon 2	10146702	10146803	101	3	4.04	237.63	41.388	139.87	16.693	0.588604	0.0717508	9.82762e-09	no
	C54G7.3b	lgx-1	X	exon 8	5536233	5536376	143	4	5.72	405.445	86.015	238.722	31.222	0.58879	0.0733705	2.0878e-08	yes
	C54G7.3a	lgx-1	X	exon 8	5536233	5536376	143	4	5.72	405.445	86.015	238.722	31.222	0.58879	0.0733705	2.0878e-08	yes
	F42A9.6(a,b)	F42A9.6	IV	exon 4	8609760	8609903	143	5	5.72	473.533	47.111	278.934	36.544	0.589049	0.043336	0	yes
	F42A9.6c	F42A9.6	IV	exon 3	8609760	8609903	143	5	5.72	473.533	47.111	278.934	36.544	0.589049	0.043336	0	yes
	F46A9.6.1	mec-8	I	exon 3	9441932	9442270	338	12	13.52	594.768	64.864	352.458	40.721	0.592597	0.0271787	0	yes
	F46A9.6.2	mec-8	I	exon 4	9441932	9442270	338	12	13.52	594.768	64.864	352.458	40.721	0.592597	0.0271787	0	yes
	H04M03.9	srv-22	IV	exon 4	5879300	5879409	109	3	4.36	152.518	21.783	90.481	11.616	0.593248	0.0657764	6.25532e-10	no
	F54D1.5	gtl-2	IV	exon 20	11280883	11281006	123	3	4.92	192.148	32.881	114.037	17.534	0.593485	0.0788274	2.50909e-07	no
	C32E8.5 (a,b)	C32E8.5	I	exon 2	3782236	3782350	114	3	4.56	1993.95	213.166	1183.67	109.428	0.59363	0.0484403	0	no
	R06C7.4	cpg-3	I	exon 3	7245507	7245754	247	7	9.88	831.556	108.311	494.001	63.867	0.594068	0.0412072	0	no
	Y47G6A.1.2	inx-21	I	exon 3	3613468	3613603	135	4	5.4	648.166	96.716	385.458	51.305	0.59469	0.0594549	9.29035e-12	yes
	Y47G6A.1.1	inx-21	I	exon 3	3613468	3613603	135	4	5.4	648.166	96.716	385.458	51.305	0.59469	0.0594549	9.29035e-12	yes
	T24D5.1	T24D5.1	X	exon 9	12576478	12576596	118	3	4.72	178.852	24.917	106.389	10.094	0.594844	0.0578875	2.57749e-12	no
	C07G3.4	str-226	V	exon 1	3512507	3512704	197	5	7.88	300.967	70.589	179.567	22.098	0.596634	0.0706721	1.14596e-08	no
	C07G2.1b	cpg-1	III	exon 3	4491122	4491364	242	8	9.68	3117.36	437.075	1860.52	243.449	0.596826	0.0404675	0	yes
	Y57A10C.4	sre-26	II	exon 5	12419039	12419240	201	5	8.04	254.256	67.271	151.933	16.233	0.597559	0.0762528	1.30803e-07	no
	T01A4.1c	gcy-28	I	exon 10	4504426	4504570	144	5	5.76	592.144	70.283	354.078	38.215	0.597959	0.0429003	0	yes
	T01A4.1b	gcy-28	I	exon 3	4504426	4504570	144	5	5.76	592.144	70.283	354.078	38.215	0.597959	0.0429003	0	yes
	T01A4.1a	gcy-28	I	exon 9	4504426	4504570	144	5	5.76	592.144	70.283	354.078	38.215	0.597959	0.0429003	0	yes
	ZK455.2	gcy-9	X	exon 24	11332513	11332659	146	5	5.84	216.267	45.223	129.456	14.64	0.598593	0.0636397	2.83608e-10	no
	T01D3.1b	T01D3.1	V	exon 22	13701656	13701778	122	3	4.88	289.759	41.412	173.481	21.33	0.598708	0.0651677	7.37465e-10	yes
	T01H10.8	T01H10.8	X	exon 5	12139811	12139924	113	3	4.52	201.426	24.437	120.722	13.719	0.599337	0.0575206	3.27094e-12	no
	T25G3.2.2	chs-1	I	exon 10	7559287	7559529	242	7	9.68	328.778	42.682	197.31	22.847	0.600131	0.0394584	0	yes
	T03D3.12	srj-49	V	exon 4	2846289	2846458	169	6	6.76	197.583	57.495	118.852	15.309	0.601529	0.0781477	3.41559e-07	no
	C46E10.1	C46E10.1	II	exon 5	3725272	3725419	147	5	5.88	346.411	88.401	208.533	21.039	0.601981	0.0738754	7.13636e-08	no
	T21E3.1	egg-4	I	exon 2	3932525	3933402	877	7	35.08	1846.28	181.019	1111.83	143.13	0.602198	0.0368316	0	no
	K07H8.8	K07H8.8	IV	exon 1	8268278	8268416	138	4	5.52	147.153	19.157	88.986	9.639	0.604718	0.0512061	1.17684e-14	no
	Y45F10D.10a	Y45F10D.10	IV	exon 2	13786566	13786691	125	3	5	175.667	21.201	106.352	12.367	0.605418	0.0585804	1.63107e-11	yes
	Y45F10D.10b	Y45F10D.10	IV	exon 3	13786566	13786691	125	3	5	175.667	21.201	106.352	12.367	0.605418	0.0585804	1.63107e-11	yes
	M01H9.5	M01H9.5	IV	exon 2	4466178	4466377	199	6	7.96	246.065	64.338	149.065	21.848	0.605795	0.0741314	1.05117e-07	no
	R03A10.3	mocs-1	X	exon 10	15436001	15436116	115	3	4.6	393.537	70.427	238.889	22.875	0.607031	0.0711336	3.30643e-08	no
	R07B7.9 (a,b)	R07B7.9	V	exon 7	12078972	12079080	108	3	4.32	187.537	32.204	113.944	11.584	0.607581	0.0700026	2.07328e-08	yes
	F15A8.4	F15A8.4	X	exon 4	4408937	4409036	99	3	3.96	215.759	28.433	131.13	14.881	0.607761	0.0610235	1.29576e-10	no
	ZK1290.7	ZK1290.7	II	exon 4	7524621	7524731	110	3	4.4	125.278	16.06	76.148	8.65	0.607832	0.0601085	6.83045e-11	no
	D1081.7a	D1081.7	I	exon 8	8489203	8490041	838	31	33.52	1385.43	188.619	842.604	103.395	0.608191	0.0200209	0	no
	D1081.7b	D1081.7	I	exon 8	8489203	8490041	838	31	33.52	1385.43	188.619	842.604	103.395	0.608191	0.0200209	0	no
	C14F11.3	lite-1	X	exon 5	6227931	6228054	123	3	4.92	312.87	44.345	190.296	20.571	0.608227	0.062596	3.88054e-10	no
	ZK1248.7	wago-5	II	exon 6	5813135	5813481	346	8	13.84	247.014	53.236	150.5	16.948	0.609277	0.0523807	8.70415e-14	no
	F52E4.7	sec-3	X	exon 3	3095963	3096061	98	3	3.92	272.889	33.504	166.444	21.145	0.609933	0.062214	3.61599e-10	no
	T28F4.4	T28F4.4	I	exon 2	7489880	7489981	101	3	4.04	176.907	22.3	108.037	13.817	0.610699	0.0633148	7.8144e-10	no
	B0416.6	gly-13	X	exon 11	9294574	9294686	112	4	4.48	220.347	33.333	134.611	17.643	0.610905	0.0611382	1.96321e-10	no
	K04A8.4	twk-10	V	exon 4	6552792	6552965	173	5	6.92	178.167	42.052	108.844	12.77	0.61091	0.0720113	6.54686e-08	no
	D1081.7a	D1081.7	I	exon 9	8490087	8490336	249	9	9.96	1366.25	201.062	835.42	90.846	0.61147	0.0372959	0	no
	D1081.7b	D1081.7	I	exon 9	8490087	8490336	249	9	9.96	1366.25	201.062	835.42	90.846	0.61147	0.0372959	0	no
	C11E4.2	gpx-3	X	exon 2	9587999	9588154	155	5	6.2	203.944	44.844	124.733	15.503	0.611604	0.0690852	1.88776e-08	no
	ZK1058.9a	ZK1058.9	III	exon 2	3925209	3925322	113	3	4.52	296.593	36.101	182.13	20.291	0.614074	0.0585012	4.19849e-11	yes
	F22B3.7	F22B3.7	IV	exon 8	11417685	11417827	142	4	5.68	293.291	48.118	180.111	19.318	0.614103	0.0601855	1.43825e-10	no
	K09E4.2a	K09E4.2	II	exon 1	14132588	14132727	139	5	5.56	329.911	74.134	202.778	20.848	0.614645	0.0679256	1.40154e-08	yes
	F49A5.2	clec-31	V	exon 2	16857448	16857622	174	6	6.96	194.666	31.03	119.778	15.535	0.6153	0.0516207	9.17044e-14	no
	K10D3.3	taf-11.2	I	exon 4	7133626	7133840	214	7	8.56	1524.89	193.569	939.31	127.448	0.615986	0.0432592	0	no
	F31C3.5	psf-2	I	exon 1	15053009	15053422	413	15	16.52	2239.63	258.506	1380.1	168.179	0.616216	0.0267055	0	no
	ZC404.13	dmsr-9	V	exon 4	6798738	6798842	104	3	4.16	146.852	19.851	90.556	13.669	0.616648	0.0721393	1.07213e-07	no
	F18C12.1	che-3	I	exon 10	8078338	8078455	117	3	4.68	226.259	30.997	139.574	20.164	0.616877	0.0709091	6.55301e-08	no
	H12I19.5b	oac-38	IV	exon 6	14151385	14151548	163	3	6.52	279.741	35.348	172.87	20.775	0.617964	0.0622166	8.23066e-10	yes
	H12I19.5a	oac-38	IV	exon 6	14151385	14151548	163	3	6.52	279.741	35.348	172.87	20.775	0.617964	0.0622166	8.23066e-10	yes
	K01C8.3b	tdc-1	II	exon 4	8271245	8271876	631	24	25.24	1201.47	207.079	742.519	82.559	0.618006	0.0258742	0	yes
	K01C8.3a	tdc-1	II	exon 4	8271245	8271876	631	24	25.24	1201.47	207.079	742.519	82.559	0.618006	0.0258742	0	yes
	Y60A3A.19(a-c)	Y60A3A.19	V	exon 2	19911969	19912119	150	3	6	599.277	61.281	370.685	33.053	0.618554	0.0484524	3.55271e-15	no
	F16B4.10	srbc-41	V	exon 2	1614287	1614441	154	5	6.16	163.844	25.797	101.378	11.799	0.618747	0.0541789	1.96532e-12	no
	F08F3.9b	snpc-1.3	V	exon 1	5438873	5438973	100	3	4	193.63	21.193	119.815	12.94	0.618783	0.054933	3.93041e-12	yes
	F08F3.9a	snpc-1.3	V	exon 1	5438873	5438973	100	3	4	193.63	21.193	119.815	12.94	0.618783	0.054933	3.93041e-12	yes
	F35G2.5a	F35G2.5	IV	exon 4	12220218	12220352	134	4	5.36	288.139	41.653	178.361	22.388	0.61901	0.0592544	1.27832e-10	yes
	Y71A12B.8	Y71A12B.8	I	exon 1	13938169	13938278	109	3	4.36	247.093	34.304	153	15.039	0.6192	0.0608116	3.80167e-10	no
	F47G4.1	clec-113	I	exon 1	14056765	14056878	113	3	4.52	215.37	34.164	133.37	15.435	0.61926	0.0702042	5.85009e-08	no
	C31H2.4	C31H2.4	X	exon 4	5156997	5157097	100	3	4	293.278	52.645	181.722	19.734	0.619624	0.0750529	4.01789e-07	no
	E03H12.5	E03H12.5	IV	exon 2	4977399	4977912	513	4	20.52	375.916	49.435	233.042	26.847	0.619931	0.054191	2.32436e-12	no
	Y17G9B.3	cyp-31A3	IV	exon 3	4761634	4761730	96	3	3.84	398.111	47.895	246.889	30.501	0.620151	0.0617416	7.63964e-10	no
	K01C8.3b	tdc-1	II	exon 7	8272412	8272595	183	7	7.32	1191.45	140.048	739.326	85.719	0.620524	0.0387227	0	yes
	K01C8.3a	tdc-1	II	exon 7	8272412	8272595	183	7	7.32	1191.45	140.048	739.326	85.719	0.620524	0.0387227	0	yes
	F15A2.4	srd-50	X	exon 1	13481517	13481725	208	7	8.32	133.008	19.785	82.587	10.263	0.620918	0.0454886	0	no
	T22D1.5	T22D1.5	IV	exon 2	6904064	6904209	145	5	5.8	1216.93	141.074	756.867	75.009	0.621946	0.0424207	0	no
	Y97E10B.1	Y97E10B.1	V	exon 4	7944636	7944741	105	3	4.2	133.222	16.273	82.907	10.624	0.622322	0.0636082	2.89282e-09	no
	C25B8.7	aexr-2	X	exon 5	6630132	6630226	94	3	3.76	172.092	24.138	107.167	13.027	0.622731	0.0667319	1.57205e-08	no
	Y39E4B.12c	gly-5	III	exon 4	13190007	13190125	118	4	4.72	1849.93	320.041	1152.42	170.305	0.622952	0.0708694	1.03581e-07	yes
	Y39E4B.12b	gly-5	III	exon 4	13190007	13190125	118	4	4.72	1849.93	320.041	1152.42	170.305	0.622952	0.0708694	1.03581e-07	yes
	Y39E4B.12a.2	gly-5	III	exon 3	13190007	13190125	118	4	4.72	1849.93	320.041	1152.42	170.305	0.622952	0.0708694	1.03581e-07	yes
	Y39E4B.12a.1	gly-5	III	exon 3	13190007	13190125	118	4	4.72	1849.93	320.041	1152.42	170.305	0.622952	0.0708694	1.03581e-07	yes
	C33A11.4	tag-97	X	exon 7	15370907	15371063	156	5	6.24	398.678	74.442	248.422	27.597	0.623114	0.0605454	4.8204e-10	no
	T28C12.3	fbxa-202	V	exon 5	6328429	6328638	209	7	8.36	177.119	33.53	110.381	11.81	0.623202	0.0512202	1.8896e-13	no
	AH9.6	AH9.6	X	exon 2	2265730	2265833	103	3	4.12	344.371	47.443	214.704	20.013	0.623467	0.0598748	3.20192e-10	no
	F30B5.4	F30B5.4	IV	exon 2	4213570	4213706	136	4	5.44	850.278	122.892	530.222	52.866	0.623587	0.0547466	6.17506e-12	no
	W03D8.5	W03D8.5	I	exon 4	2817555	2817647	92	3	3.68	211.278	32.925	131.833	16.394	0.623979	0.0718247	1.6475e-07	no
	Y48G1BL.5	Y48G1BL.5	I	pseudogene	220398	220560	162	4	6.48	148.528	21.035	92.68	12.913	0.62399	0.061984	1.30935e-09	no
	ZK678.6	srg-64	X	exon 4	15736927	15737108	181	5	7.24	169.633	20.138	105.867	11.129	0.624094	0.0442571	0	no
	ZC513.6	oma-2	V	exon 4	8029873	8030020	147	5	5.88	3742.89	389.387	2336.54	254.027	0.624262	0.0420095	0	no
	Y5H2B.2b	nhr-13	V	exon 5	2196495	2196627	132	4	5.28	224.43	27.291	140.167	18.002	0.624547	0.0552307	1.06151e-11	yes
	F59A3.6	rpa-4	I	exon 1	5511604	5511692	88	3	3.52	156.019	19.834	97.444	11.366	0.624565	0.0622126	1.59243e-09	no
	T07F10.4a	bus-19	V	exon 4	12879870	12879964	94	3	3.76	394.63	54.427	246.648	34.05	0.625011	0.0704164	1.00781e-07	yes
	C01G12.7	C01G12.7	II	exon 3	14590812	14590952	140	5	5.6	320.8	53.762	200.511	24.964	0.625034	0.0583571	1.31549e-10	no
	F32D8.2	F32D8.2	V	exon 2	10883805	10883916	111	3	4.44	230.889	28.901	144.389	15.887	0.625361	0.060172	4.78081e-10	no
	F14D12.6b	octr-1	X	exon 7	5609571	5609744	173	6	6.92	228.583	57.483	142.963	16.918	0.625431	0.0709637	1.30377e-07	no
	F14D12.6a	octr-1	X	exon 7	5609571	5609744	173	6	6.92	228.583	57.483	142.963	16.918	0.625431	0.0709637	1.30377e-07	no
	C49C8.4	cyp-33E1	IV	exon 5	8647335	8647466	131	4	5.24	155.403	30.645	97.264	11.355	0.625882	0.0717146	1.82087e-07	no
	T15D6.12	T15D6.12	I	exon 8	12399310	12399412	102	3	4.08	169.278	21.865	106	14.716	0.626189	0.0685553	4.96116e-08	no
	C50B6.11	lgc-48	V	exon 2	13340617	13340740	123	4	4.92	219.306	38.352	137.333	18.548	0.626216	0.0691845	6.56417e-08	no
	F38E11.6b	F38E11.6	IV	exon 11	9464743	9464851	108	3	4.32	144.611	23.219	90.592	11.168	0.626453	0.0732151	3.36002e-07	yes
	F38E11.6a	F38E11.6	IV	exon 11	9464743	9464851	108	3	4.32	144.611	23.219	90.592	11.168	0.626453	0.0732151	3.36002e-07	yes
	F54D12.9	F54D12.9	II	exon 2	1381250	1381420	170	5	6.8	245.555	33.185	153.833	17.542	0.626471	0.0495404	4.70735e-14	no
	D1081.7a	D1081.7	I	exon 5	8488562	8488743	181	7	7.24	1406.9	184.327	882.039	107.992	0.626937	0.0424915	0	no
	T22D1.5	T22D1.5	IV	exon 5	6904674	6905173	499	18	19.96	1388.32	166.247	871.188	106.889	0.627511	0.0253575	0	no
	F54F7.6	F54F7.6	X	exon 3	11866320	11866477	157	5	6.28	1204.17	118.028	756.089	75.788	0.627893	0.0393671	0	no
	R10E11.7	srxa-10	III	exon 1	9796329	9796446	117	4	4.68	256.833	38.84	161.305	20.129	0.628054	0.0615698	1.53123e-09	no
	Y62F5A.9	Y62F5A.9	II	exon 1	11538534	11538723	189	7	7.56	255.778	35.35	160.849	19.17	0.628862	0.043377	0	no
	F35E12.7d	dct-17	V	exon 3	13730129	13730220	91	3	3.64	196.296	28.705	123.704	14.5	0.630191	0.0681885	5.8498e-08	yes
	F35E12.7c	dct-17	V	exon 3	13730129	13730220	91	3	3.64	196.296	28.705	123.704	14.5	0.630191	0.0681885	5.8498e-08	yes
	F35E12.7b	dct-17	V	exon 3	13730129	13730220	91	3	3.64	196.296	28.705	123.704	14.5	0.630191	0.0681885	5.8498e-08	yes
	F35E12.7a	dct-17	V	exon 3	13730129	13730220	91	3	3.64	196.296	28.705	123.704	14.5	0.630191	0.0681885	5.8498e-08	yes
	C10F3.1	cpg-4	V	exon 4	5997057	5997339	282	10	11.28	1097.52	140.19	691.734	74.781	0.630269	0.0333524	0	no
	F58G1.1	wago-4	II	exon 10	12922302	12922666	364	10	14.56	943.083	123.62	594.528	74.765	0.630409	0.0362123	0	no
	C07G2.1a	cpg-1	III	exon 2	4489632	4490377	745	28	29.8	5791.23	714.348	3651.68	396.663	0.630554	0.0195858	0	yes
	T28B8.2	ins-18	I	exon 1	8147420	8147576	156	5	6.24	379.666	80.29	239.556	33.745	0.630965	0.0716998	2.64763e-07	no
	C16C10.12	wht-3	III	exon 9	4147752	4147870	118	3	4.72	166.685	20.899	105.185	14.808	0.631041	0.0686833	7.79153e-08	no
	W03D8.11	W03D8.11	I	exon 2	2819485	2819696	211	6	8.44	280.704	53.047	177.241	21.793	0.631416	0.0581173	2.26696e-10	no
	F38A1.14	clec-169	IV	exon 1	1261326	1261542	216	7	8.64	284.603	68.851	179.714	21.709	0.631455	0.0645361	1.12527e-08	no
	D1081.7a	D1081.7	I	exon 4	8488289	8488492	203	7	8.12	1780.29	202.372	1124.6	114.986	0.631698	0.0365044	0	no
	D1081.7b	D1081.7	I	exon 4	8488289	8488492	203	7	8.12	1780.29	202.372	1124.6	114.986	0.631698	0.0365044	0	no
	H22K11.3	H22K11.3	X	exon 2	6783438	6783569	131	4	5.24	324.93	49.483	205.306	23.782	0.631847	0.0604479	1.12611e-09	no
	Y17G7B.13	Y17G7B.13	II	exon 7	12047116	12047250	134	5	5.36	743.212	77.917	469.633	46.169	0.631896	0.0406144	0	no
	M176.6b	kin-15	II	exon 1	9433453	9433622	169	6	6.76	140.361	21.053	88.704	10.814	0.63197	0.0498682	1.58318e-13	yes
	B0495.1	sre-1	II	exon 8	7711201	7711361	160	5	6.4	201.289	34.523	127.256	16.311	0.632205	0.0605363	1.23523e-09	no
	T28B8.5	del-4	I	exon 11	8139661	8139834	173	6	6.92	152.306	22.901	96.296	11.457	0.632253	0.0494912	1.08136e-13	no
	K01C8.3b	tdc-1	II	exon 2	8270703	8270831	128	4	5.12	969.319	126.163	613.014	63.573	0.632417	0.0526233	2.84528e-12	yes
	K01C8.3a	tdc-1	II	exon 2	8270703	8270831	128	4	5.12	969.319	126.163	613.014	63.573	0.632417	0.0526233	2.84528e-12	yes
	D2092.10	D2092.10	I	exon 1	6627823	6627915	92	3	3.68	142.593	16.748	90.222	11.177	0.632724	0.0623614	3.87412e-09	no
	F40H3.5	hst-3.1	II	exon 4	6167987	6168205	218	7	8.72	193.452	42.415	122.532	15.319	0.633397	0.0604233	1.30126e-09	no
	C14C11.2.2	C14C11.2	V	exon 6	5661859	5662169	310	4	12.4	751.737	107.531	476.25	61.587	0.633533	0.0610827	1.97893e-09	yes
	C14C11.2.1	C14C11.2	V	exon 5	5661859	5662169	310	4	12.4	751.737	107.531	476.25	61.587	0.633533	0.0610827	1.97893e-09	yes
	F27C1.11	F27C1.11	I	exon 17	5437750	5437919	169	6	6.76	195.639	45.621	123.991	14.17	0.633774	0.067191	5.02245e-08	no
	B0365.7	dhc-3	V	exon 18	13145382	13145487	105	3	4.2	144.63	16.185	91.667	12.398	0.633803	0.0642362	1.1926e-08	yes
	T26H10.1(a,b)	des-2	V	exon 6	11417478	11417631	153	5	6.12	179.633	24.711	113.911	15.016	0.634132	0.0540323	1.27638e-11	yes
	Y32G9A.6	nphp-2	V	exon 11	1905500	1905614	114	3	4.56	226.167	28.989	143.444	17.369	0.634239	0.0645665	1.47136e-08	no
	B0280.5	cpg-2	III	exon 4	7102411	7102686	275	9	11	552.234	59.477	350.426	41.936	0.634561	0.0340548	0	no
	T10B9.8	cyp-13A1	II	exon 3	9780893	9781131	238	8	9.52	213.931	35.125	136.063	17.813	0.636013	0.0472201	1.26565e-14	no
	F54F7.6	F54F7.6	X	exon 2	11865673	11866152	479	18	19.16	813.015	106.905	517.259	65.655	0.636223	0.0274065	0	no
	K01A11.4a	spe-41	III	exon 5	3442946	3443077	131	4	5.24	171.153	25.885	108.986	10.42	0.636775	0.0569676	1.81784e-10	yes
	C01B10.1	drh-2	IV	pseudogene	6616398	6616525	127	4	5.08	164.778	21.454	105.028	10.803	0.637391	0.0528801	7.02283e-12	no
	C41G6.2	srw-12	V	exon 3	15237139	15237319	180	6	7.2	248.62	61.625	158.5	17.48	0.637519	0.070609	2.84197e-07	no
	W08F4.3	W08F4.3	II	exon 2	580816	580937	121	4	4.84	2228.63	280.408	1421.44	150.278	0.637811	0.0524093	4.82014e-12	no
	T23B7.3a	T23B7.3	II	exon 1	4850200	4850319	119	3	4.76	248.129	35.127	158.371	21.066	0.638261	0.0715828	4.33925e-07	yes
	C14C6.3	C14C6.3	V	exon 10	545090	545188	98	3	3.92	177.944	21.746	113.593	11.111	0.638364	0.0576912	3.64589e-10	no
	F59E12.8	F59E12.8	II	exon 5	5635049	5635165	116	3	4.64	146.778	22.571	93.741	8.598	0.638658	0.0660221	4.42372e-08	no
	Y17G7B.13	Y17G7B.13	II	exon 6	12046783	12046935	152	5	6.08	745.256	85.643	476.378	48.427	0.639214	0.0438597	2.22045e-16	no
	R13D7.10	srt-6	V	exon 3	7407754	7407900	146	4	5.84	156.653	19.697	100.153	11.03	0.63933	0.0534315	1.47715e-11	no
	C56E10.4c	nhr-137	X	exon 7	6662339	6662460	121	3	4.84	201.037	26.889	128.556	15.316	0.639464	0.0661297	4.98215e-08	yes
	C56E10.4b	nhr-137	X	exon 10	6662339	6662460	121	3	4.84	201.037	26.889	128.556	15.316	0.639464	0.0661297	4.98215e-08	yes
	C56E10.4a	nhr-137	X	exon 7	6662339	6662460	121	3	4.84	201.037	26.889	128.556	15.316	0.639464	0.0661297	4.98215e-08	yes
	F35C11.4	F35C11.4	II	exon 4	8250523	8250676	153	5	6.12	184.133	27.909	117.911	15.718	0.640358	0.0578051	4.91995e-10	no
	D2030.8	D2030.8	I	exon 9	7594408	7594569	161	5	6.44	2801.53	380.038	1794.05	183.331	0.640383	0.048639	1.42997e-13	no
	F59F5.3	F59F5.3	X	exon 8	10539974	10540071	97	3	3.88	138.167	14.463	88.519	10.824	0.640667	0.059539	1.58705e-09	no
	K06B9.2	K06B9.2	IV	pseudogene	4188200	4188295	95	3	3.8	149.241	18.931	95.648	10.659	0.640896	0.0624771	9.0432e-09	no
	C31H5.5	C31H5.5	I	exon 2	9048739	9048866	127	4	5.08	237.069	35.584	151.944	20.756	0.640927	0.0650394	3.37361e-08	no
	F33D11.4	ceh-12	I	exon 1	5840292	5840493	201	6	8.04	204.324	26.193	131	17.315	0.641139	0.0481949	9.61453e-14	no
	T13A10.14	srv-28	IV	exon 3	6262032	6262141	109	3	4.36	160.833	17.582	103.13	12.04	0.641224	0.0592107	1.3671e-09	no
	D2062.9	sri-77	II	exon 3	2603791	2604009	218	4	8.72	173.68	20.967	111.444	14.213	0.641663	0.0563413	2.016e-10	no
	F55G11.9	abt-3	IV	pseudogene	12951106	12951212	106	4	4.24	210.208	37.754	134.917	16.823	0.641826	0.0701657	3.31351e-07	no
	C03C11.2	C03C11.2	I	exon 4	10017178	10017280	102	3	4.08	386.537	57.602	248.092	24.741	0.641832	0.0664457	7.03086e-08	no
	W03B1.1	W03B1.1	IV	pseudogene	4334693	4334793	100	3	4	187.185	20.056	120.222	13.271	0.642263	0.057044	3.58177e-10	no
	Y39B6A.40	Y39B6A.40	V	exon 2	18980765	18980863	98	3	3.92	293.87	37.126	188.778	15.977	0.642386	0.0563976	2.28371e-10	no
	K02B2.3	mcu-1	IV	exon 5	5938006	5938124	118	4	4.72	384.222	66.445	246.917	28.783	0.642641	0.0670126	9.6759e-08	no
	Y53G8AM.6	Y53G8AM.6	III	exon 1	3260750	3260871	121	3	4.84	541.704	88.708	348.389	34.827	0.643135	0.0712398	5.46154e-07	no
	T21B10.4	T21B10.4	II	exon 4	8941385	8941487	102	3	4.08	662.278	80.382	426.408	47.681	0.64385	0.0613461	6.41463e-09	no
	W04G5.10	W04G5.10	I	exon 4	11639554	11639725	171	5	6.84	147.333	21.182	94.867	12.138	0.643895	0.0554201	1.31388e-10	no
	Y73B3B.2	set-28	X	exon 2	214697	214861	164	3	6.56	342.611	49.287	220.648	22.271	0.644019	0.0653424	5.09589e-08	no
	D1081.7a	D1081.7	I	exon 7	8488909	8489156	247	8	9.88	1831.83	261.982	1180.23	139.56	0.644291	0.0422714	0	no
	D1081.7b	D1081.7	I	exon 7	8488909	8489156	247	8	9.88	1831.83	261.982	1180.23	139.56	0.644291	0.0422714	0	no
	Y66D12A.17	such-1	III	exon 8	11517064	11517183	119	4	4.76	522.097	78.127	336.403	45.805	0.64433	0.0651795	4.84881e-08	no
	Y92H12BR.4	Y92H12BR.4	I	pseudogene	1433016	1433153	137	5	5.48	177.155	22.577	114.222	16.273	0.644757	0.0551173	1.15437e-10	no
	Y62E10A.14	Y62E10A.14	IV	exon 3	13399528	13399719	191	3	7.64	768.555	106.989	495.759	51.743	0.645053	0.0647973	4.30657e-08	no
	B0205.2b	srz-85	I	exon 5	10724148	10724399	251	8	10.04	199.229	48.961	128.542	17.271	0.645197	0.0638904	2.80325e-08	yes
	B0205.2a	srz-85	I	exon 4	10724148	10724399	251	8	10.04	199.229	48.961	128.542	17.271	0.645197	0.0638904	2.80325e-08	yes
	D2096.4	sqv-1	IV	exon 3	8361609	8361764	155	5	6.2	1246.85	171.627	804.866	92.962	0.645522	0.0518732	8.28426e-12	no
	D2096.4	sqv-1	IV	exon 3	8361609	8361764	155	5	6.2	1246.85	171.627	804.866	92.962	0.645522	0.0518732	8.28426e-12	no
	ZK507.3	ZK507.3	III	exon 3	9101539	9101694	155	3	6.2	244.389	24.475	157.852	19.167	0.645905	0.0586948	1.61124e-09	no
	C49A1.6	clec-115	I	exon 6	14247146	14247298	152	5	6.08	202.189	29.765	130.622	16.342	0.646039	0.0558173	2.2766e-10	no
	Y50F7A.2	Y50F7A.2	II	exon 3	1184226	1184390	164	3	6.56	126.685	14.974	81.907	10.124	0.646541	0.0638394	3.08236e-08	no
	F55E10.6	F55E10.6	X	exon 6	8345100	8345257	157	5	6.28	292.311	61.711	189.133	20.778	0.647027	0.068864	2.96495e-07	no
	Y65B4BL.4	Y65B4BL.4	I	exon 4	505509	505608	99	3	3.96	253.741	36.464	164.407	20.186	0.647932	0.0707072	6.38364e-07	no
	H39E23.2	H39E23.2	V	exon 2	14110601	14110705	104	3	4.16	192.778	26.985	124.963	15.572	0.648222	0.0701386	5.29056e-07	no
	Y49E10.16a	Y49E10.16	III	exon 3	12430915	12431036	121	4	4.84	223.028	36.987	144.597	20.885	0.648336	0.0712909	8.10557e-07	yes
	T16H12.6	kel-10	III	exon 7	10099977	10100075	98	3	3.92	156.518	21.513	101.481	12.419	0.648366	0.0688898	3.32038e-07	no
	W06D4.6	rad-54	I	exon 10	9067326	9067433	107	3	4.28	456.852	46.861	296.315	31.784	0.648602	0.055577	2.56981e-10	no
	F56D5.10	srxa-2	IV	exon 1	9423372	9423507	135	4	5.4	177.472	27.189	115.125	12.207	0.648694	0.060431	6.12382e-09	no
	K01D12.4a	twk-14	V	exon 5	12387756	12387914	158	5	6.32	256.633	52.377	166.533	20.524	0.648915	0.0691895	3.89025e-07	yes
	K01D12.4(b,c)	twk-14	V	exon 6	12387756	12387914	158	5	6.32	256.633	52.377	166.533	20.524	0.648915	0.0691895	3.89025e-07	yes
	E02C12.5	gpa-3	V	exon 3	9358154	9358282	128	4	5.12	140.07	18.71	90.93	10.084	0.649175	0.0563522	4.79821e-10	no
	C55B7.1	glh-2	I	exon 7	6516723	6516826	103	3	4.12	865.241	96.593	561.778	57.201	0.649273	0.0566401	5.93323e-10	no
	T15B7.12	dmsr-13	V	exon 2	6818920	6819120	200	4	8	160.347	17.275	104.333	11.915	0.65067	0.0510775	7.96274e-12	no
	F14D2.7	F14D2.7	II	exon 2	3338101	3338255	154	4	6.16	229.139	27.645	149.208	24.347	0.651168	0.0660718	1.29472e-07	no
	T01A4.1d	gcy-28	I	exon 3	4482155	4482422	267	9	10.68	488.16	58.849	317.95	37.104	0.651323	0.0364271	0	yes
	F42C5.3a	F42C5.3	IV	exon 4	7286569	7286688	119	3	4.76	138.537	19.462	90.259	11.463	0.651515	0.0712356	9.98163e-07	yes
	F42C5.3b	F42C5.3	IV	exon 3	7286569	7286688	119	3	4.76	138.537	19.462	90.259	11.463	0.651515	0.0712356	9.98163e-07	yes
	F58A3.2d	egl-15	X	exon 23	11023030	11023312	282	10	11.28	199.472	43.164	130	17.933	0.651721	0.0528876	4.54026e-11	yes
	F58A3.2b.1	egl-15	X	exon 21	11023030	11023312	282	10	11.28	199.472	43.164	130	17.933	0.651721	0.0528876	4.54026e-11	yes
	C04B4.2	C04B4.2	X	exon 2	12283492	12283772	280	10	11.2	1487.04	173.647	969.25	96.047	0.651799	0.0315673	0	no
	F36D1.9	F36D1.9	I	exon 3	11275547	11275635	88	3	3.52	405.556	47.623	264.407	32.061	0.651962	0.0635365	4.30724e-08	no
	F57B7.1b	dmsr-1	V	exon 5	11440746	11440915	169	5	6.76	279.989	34.683	182.633	19.422	0.652286	0.0476246	2.85327e-13	yes
	F57B7.1a	dmsr-1	V	exon 5	11440746	11440931	185	5	7.4	279.989	34.683	182.633	19.422	0.652286	0.0476246	2.85327e-13	yes
	F42G9.7	snt-2	III	exon 6	787462	787595	133	3	5.32	208.222	27.034	135.889	16.019	0.652616	0.0660754	1.46118e-07	no
	Y73F8A.34a.2	tag-349	IV	exon 5	15524678	15524798	120	3	4.8	277.445	33.095	181.093	18.217	0.652717	0.0588027	3.50718e-09	yes
	Y73F8A.34a.1	tag-349	IV	exon 5	15524678	15524798	120	3	4.8	277.445	33.095	181.093	18.217	0.652717	0.0588027	3.50718e-09	yes
	F41E7.6	F41E7.6	X	exon 10	10308223	10308353	130	4	5.2	145.5	23.099	95.014	12.45	0.653017	0.067211	2.43555e-07	no
	F32G8.2	F32G8.2	V	exon 3	10551316	10551429	113	3	4.52	136.963	16.084	89.445	11.135	0.65306	0.0645267	7.58639e-08	no
	T05B4.6	srw-133	V	exon 4	4113257	4113398	141	5	5.64	162.767	23.164	106.322	12.392	0.653216	0.0537367	1.09373e-10	no
	F59A3.2	F59A3.2	I	exon 4	5513292	5513530	238	8	9.52	496.611	54.373	324.68	37.225	0.653791	0.0366448	0	no
	F28B1.8	srh-255	V	exon 2	17065397	17065581	184	6	7.36	203.528	28.626	133.083	14.561	0.653881	0.0475683	3.43281e-13	no
	C35C5.2	gcp-2.2	X	exon 9	11539931	11540075	144	5	5.76	290.767	49.278	190.233	19.497	0.654245	0.0579488	2.4232e-09	no
	F15A8.4	F15A8.4	X	exon 3	4408757	4408875	118	4	4.72	141.666	18.476	92.708	10.624	0.654412	0.0568073	1.17586e-09	no
	C48C5.1	nmur-1	X	exon 2	8981477	8981577	100	3	4	151	16.998	98.907	10.851	0.655013	0.059444	6.49227e-09	no
	F26B1.3	ima-2	I	exon 1	6315235	6315344	109	3	4.36	2584.19	265.669	1693.37	170.803	0.655282	0.0544881	2.50806e-10	no
	Y97E10B.7a	ncx-10	V	exon 9	7930283	7930401	118	3	4.72	158.13	18.468	103.667	12.365	0.655581	0.0631842	5.00778e-08	yes
	Y97E10B.7b	ncx-10	V	exon 10	7930283	7930401	118	3	4.72	158.13	18.468	103.667	12.365	0.655581	0.0631842	5.00778e-08	yes
	C52E12.4	lst-6	II	exon 9	7017538	7017695	157	5	6.28	375.778	73.245	246.367	29.04	0.655618	0.066787	2.5172e-07	no
	Y46G5A.28	Y46G5A.28	II	exon 4	12851553	12851802	249	7	9.96	372.698	47.399	244.46	27.212	0.65592	0.0419006	2.22045e-16	no
	T05A7.10	fut-5	II	exon 2	4667291	4667400	109	3	4.36	143.093	18.539	93.907	12.349	0.656266	0.0699454	8.9087e-07	no
	C52B11.5	C52B11.5	X	exon 2	1273669	1273846	177	5	7.08	223.4	34.699	146.644	17.518	0.656419	0.0575223	2.32929e-09	no
	C14B1.2	C14B1.2	III	exon 2	3702448	3702564	116	3	4.64	1087.72	130.144	714.055	84.785	0.656468	0.0638883	7.57084e-08	no
	T20D4.3	T20D4.3	V	exon 17	3422288	3422393	105	3	4.2	164.555	22.622	108.074	12.216	0.656765	0.0674858	3.65635e-07	no
	H31G24.1	H31G24.1	I	exon 1	4123482	4123618	136	4	5.44	353.652	49.635	232.278	26.513	0.656798	0.0594092	7.60834e-09	no
	Y45F10B.14	srd-10	IV	exon 2	13575378	13575531	153	4	6.12	130.306	19.889	85.625	10.078	0.657107	0.0633265	6.1397e-08	no
	F42A10.8	F42A10.8	III	exon 1	6182965	6183162	197	6	7.88	267.445	50.304	175.741	19.649	0.657111	0.0586996	5.17572e-09	no
	F57C2.6 (a,b)	spat-1	II	exon 4	14529075	14529204	129	4	5.16	1124.78	127.781	739.71	80.523	0.65765	0.0517376	3.66447e-11	yes
	F30B5.4	F30B5.4	IV	exon 1	4214854	4214990	136	4	5.44	930.971	122.969	612.443	67.753	0.657854	0.0566723	1.56741e-09	no
	T22D1.5	T22D1.5	IV	exon 3	6904256	6904460	204	7	8.16	1817.97	188.386	1196.33	128.392	0.658055	0.0371053	0	no
	Y57G11A.5	Y57G11A.5	IV	exon 3	14511851	14511956	105	3	4.2	181.111	19.844	119.204	15.015	0.658182	0.0634401	7.12273e-08	no
	F52F12.4	lsl-1	I	exon 5	9902419	9902527	108	4	4.32	1296.2	154.905	853.236	111.278	0.658262	0.0582209	4.36613e-09	no
	Y39E4B.5	Y39E4B.5	III	exon 3	13170710	13171161	451	16	18.04	1118.07	124.772	736.032	76.711	0.658306	0.0251301	0	no
	AH6.4	sra-1	II	exon 2	9520981	9521126	145	4	5.8	171.042	21.766	112.611	13.727	0.658382	0.0580095	3.88546e-09	no
	F31C3.1	cyn-5	I	exon 1	15041050	15041258	208	7	8.32	1763.8	248.104	1161.33	134.931	0.658429	0.0454035	5.35127e-14	no
	C45B2.4a	ggr-2	X	exon 14	6081126	6081228	102	3	4.08	218.167	27.66	143.796	17.013	0.65911	0.0659902	2.3945e-07	yes
	C45B2.4b	ggr-2	X	exon 7	6081126	6081228	102	3	4.08	218.167	27.66	143.796	17.013	0.65911	0.0659902	2.3945e-07	yes
	T19H12.4	srd-33	V	exon 3	4872829	4872923	94	3	3.76	193.778	23.164	127.722	14.159	0.659115	0.0620398	3.91552e-08	no
	T22B3.1	dpy-20	IV	exon 2	11698739	11698876	137	4	5.48	188.514	24.235	124.292	14.218	0.659325	0.0567294	1.91028e-09	no
	F49E10.1	tbc-16	X	exon 11	5899216	5899383	167	5	6.68	169.833	23.217	112.022	15.115	0.659601	0.0566597	1.88078e-09	no
	C07G2.1b	cpg-1	III	exon 2	4489632	4489756	124	4	4.96	3656.48	403.441	2412.5	301.744	0.659788	0.0550219	6.28087e-10	yes
	T25G3.2.1	chs-1	I	exon 1	7554886	7555102	216	7	8.64	373.667	41.158	246.571	26.57	0.659868	0.0384313	0	yes
	T01A4.1c	gcy-28	I	exon 8	4502571	4502900	329	12	13.16	834.25	88.186	550.833	62.51	0.660273	0.0295605	0	yes
	T01A4.1a	gcy-28	I	exon 7	4502571	4502900	329	12	13.16	834.25	88.186	550.833	62.51	0.660273	0.0295605	0	yes
	T15D6.6	nhr-77	I	exon 4	12384803	12385029	226	7	9.04	180.96	41.788	119.484	15.807	0.660279	0.066417	3.13777e-07	no
	F32B6.2	mccc-1	IV	exon 8	9886602	9886745	143	4	5.72	691.333	76.561	456.486	48.016	0.660298	0.0504257	1.62055e-11	no
	C09G1.5.2	C09G1.5	X	exon 5	15962015	15962237	222	6	8.88	307.37	36.583	203.167	26.055	0.660985	0.0472132	6.94556e-13	yes
	F23B2.4	daf-10	IV	exon 3	9143928	9144048	120	4	4.8	254.069	39.957	167.987	19.116	0.661187	0.0641747	1.29503e-07	no
	F14B8.6	F14B8.6	X	exon 7	6930323	6930432	109	3	4.36	355.204	46.769	234.889	29.126	0.661279	0.0690525	9.32997e-07	no
	K04E7.3	nas-33	X	exon 8	6453833	6453947	114	4	4.56	152.514	22.507	100.861	12.489	0.661323	0.0636987	1.05572e-07	no
	ZC477.2	ZC477.2	IV	exon 8	7109442	7109556	114	3	4.56	190.815	22.202	126.222	13.442	0.661489	0.0602395	1.91594e-08	no
	C31H2.4	C31H2.4	X	exon 7	5156410	5156506	96	3	3.84	243.148	30.898	160.907	19.468	0.661766	0.0670383	4.526e-07	no
	ZC449.1	ZC449.1	X	exon 12	5028004	5028105	101	3	4.04	139.482	16.744	92.333	11.193	0.661971	0.0652032	2.16892e-07	no
	C27D9.1	C27D9.1	II	exon 3	4753737	4753939	202	7	8.08	732.333	110.952	485.333	49.394	0.662722	0.0457172	1.61204e-13	no
	C31B8.9	C31B8.9	V	exon 1	2912675	2912828	153	5	6.12	167.222	27.025	110.822	15.948	0.662724	0.0641353	1.44982e-07	no
	Y64G10A.6	Y64G10A.6	IV	exon 7	14280283	14280458	175	6	7	267.519	35.245	177.417	24.093	0.663194	0.051227	4.87264e-11	no
	Y40C7B.1	Y40C7B.1	X	exon 1	17259801	17261571	1770	15	70.8	141.626	39.327	93.989	11.083	0.663642	0.0516937	7.67975e-11	no
	B0218.6	clec-51	IV	exon 6	8162558	8162677	119	4	4.76	164.917	20.796	109.458	14.031	0.663716	0.0596725	1.7455e-08	no
	H24G06.1a	H24G06.1	V	exon 18	9456882	9457118	236	8	9.44	348.07	52.378	231.021	25.761	0.66372	0.0439504	1.9984e-14	yes
	F45D3.1	F45D3.1	V	exon 2	12527015	12527191	176	5	7.04	704.899	80.303	468.033	63.655	0.663972	0.0526806	1.78724e-10	no
	T01H3.4	perm-1	II	exon 1	7880736	7880862	126	4	5.04	393.042	60.06	261.014	33.816	0.664087	0.0665208	4.4239e-07	no
	T07F8.2	npr-31	II	exon 6	7144552	7144658	106	3	4.24	231.037	26.297	153.463	18.691	0.664236	0.0639294	1.50364e-07	no
	T23G11.3.1	gld-1	I	exon 1	7695675	7695878	203	7	8.12	4035.94	457.208	2681.92	271.284	0.66451	0.0381444	0	yes
	T23G11.3.3	gld-1	I	exon 1	7695675	7695878	203	7	8.12	4035.94	457.208	2681.92	271.284	0.66451	0.0381444	0	yes
	C04B4.2	C04B4.2	X	exon 3	12283827	12283965	138	5	5.52	1851.32	231.575	1230.89	117.738	0.66487	0.0468212	8.20677e-13	no
	F15E11.3	irld-29	V	exon 2	2338119	2338247	128	3	5.12	171.426	19.232	113.981	12.914	0.664899	0.0612081	4.38051e-08	no
	F58G1.1	wago-4	II	exon 3	12919921	12920089	168	5	6.72	670.512	81.36	445.989	51.804	0.665147	0.0499662	2.06162e-11	no
	T09A5.3	acr-7	II	exon 1	7849541	7849720	179	5	7.16	119.578	16.64	79.578	9.921	0.66549	0.0556049	1.78969e-09	no
	H12C20.5	srx-90	V	exon 5	11581819	11581946	127	3	5.08	179.537	23.345	119.518	12.544	0.665701	0.0642244	1.93822e-07	no
	D2096.4	sqv-1	IV	exon 2	8361297	8361414	117	4	4.68	939.75	115.443	625.764	73.102	0.665883	0.056441	3.22432e-09	no
	K02E11.1	ent-3	V	exon 4	14234991	14235113	122	4	4.88	211.875	30.155	141.111	19.225	0.666011	0.0656094	3.56981e-07	no
	W03F8.2	W03F8.2	IV	pseudogene	5190392	5190501	109	3	4.36	119	14.893	79.259	9.21	0.666042	0.0656714	3.6707e-07	no
	F26A3.8a	rrf-1	I	exon 4	7648832	7648954	122	4	4.88	211.5	32.355	140.944	14.034	0.666402	0.060819	4.13233e-08	yes
	F26A3.8b	rrf-1	I	exon 3	7648832	7648954	122	4	4.88	211.5	32.355	140.944	14.034	0.666402	0.060819	4.13233e-08	yes
	F39C12.2e	add-1	X	exon 6	4858175	4858342	167	5	6.68	542.065	94.821	361.288	50.27	0.666503	0.0666231	5.56521e-07	yes
	F39C12.2d	add-1	X	exon 6	4858175	4858342	167	5	6.68	542.065	94.821	361.288	50.27	0.666503	0.0666231	5.56521e-07	yes
	F39C12.2c	add-1	X	exon 6	4858175	4858342	167	5	6.68	542.065	94.821	361.288	50.27	0.666503	0.0666231	5.56521e-07	yes
	F39C12.2b	add-1	X	exon 6	4858175	4858342	167	5	6.68	542.065	94.821	361.288	50.27	0.666503	0.0666231	5.56521e-07	yes
	F39C12.2a	add-1	X	exon 6	4858175	4858342	167	5	6.68	542.065	94.821	361.288	50.27	0.666503	0.0666231	5.56521e-07	yes
	F48E8.4	F48E8.4	III	exon 4	5454941	5455343	402	15	16.08	671.626	84.006	447.648	56.85	0.666514	0.0306755	0	no
	Exons upregulated in mec-8
	Y46H3A.2	hsp-16.41	V	exon 1	1805061	1805236	175	5	7	802.432	99.704	4051.57	688.22	5.04911	0.475222	0	no
	Y46H3A.2	hsp-16.41	V	exon 2	1805295	1805703	408	13	16.32	433.919	50.275	2111.8	433.29	4.8668	0.318055	0	no
	F36A2.13	F36A2.13	I	exon 9	8836547	8836775	228	7	9.12	163.873	22.067	637.357	65.876	3.88934	0.249542	0	no
	T15D6.8	T15D6.8	I	exon 1	12389747	12389908	161	5	6.44	147.422	17.743	521.211	66.574	3.5355	0.277487	0	no
	F36A2.13	F36A2.13	I	exon 4	8837733	8837841	108	3	4.32	120.222	15.609	336.019	41.691	2.79499	0.289796	5.86691e-10	no
	F36A2.13	F36A2.13	I	exon 17	8833728	8833875	147	5	5.88	285.289	36.676	768.355	83.542	2.69325	0.202796	0	no
	F36A2.13	F36A2.13	I	exon 14	8834648	8835211	563	21	22.52	295.593	42.059	780.064	85.545	2.63898	0.103452	0	no
	K12G11.3	sodh-1	V	exon 1	11888054	11888383	329	12	13.16	263.834	31.304	689.458	72.189	2.61323	0.119374	0	no
	F36A2.13	F36A2.13	I	exon 26	8829130	8829694	564	21	22.56	180.458	22.548	464.074	53.667	2.57165	0.0955415	0	no
	T15D6.8	T15D6.8	I	exon 4	12390350	12390643	293	8	11.72	257.451	30.276	657.577	82.397	2.55418	0.155183	0	no
	F36A2.13	F36A2.13	I	exon 8	8836835	8837257	422	15	16.88	299.178	36.49	763.815	85.362	2.55305	0.109048	0	no
	F13G11.1b.2	dmd-6	IV	exon 2	14619694	14619823	129	4	5.16	484.722	60.603	1234	137.646	2.54579	0.213276	4.23439e-13	yes
	F13G11.1b.1	dmd-6	IV	exon 3	14619694	14619823	129	4	5.16	484.722	60.603	1234	137.646	2.54579	0.213276	4.23439e-13	yes
	F46G11.3	tag-257	X	exon 8	5785712	5785816	104	3	4.16	351.5	37.512	857.13	78.642	2.43849	0.19814	3.87246e-13	no
	C23F12.1	C23F12.1	X	exon 17	9406419	9406526	107	3	4.28	670.132	83.705	1629.92	171.998	2.43224	0.229619	4.44671e-10	no
	T15D6.8	T15D6.8	I	exon 3	12390182	12390301	119	3	4.76	138.093	16.355	333.093	40.831	2.41209	0.237371	2.7e-09	no
	F21C10.7	F21C10.7	V	exon 17	9116975	9117067	92	3	3.68	385.63	46.726	917.797	91.596	2.37999	0.2157	1.57691e-10	no
	M05D6.4	lact-4	II	exon 4	8478178	8478414	236	8	9.44	221	28.084	518.028	86.35	2.34402	0.173707	1.02141e-14	no
	F35C11.2	F35C11.2	II	exon 4	8244369	8244610	241	4	9.64	374.5	48.584	871.681	163.972	2.32759	0.265935	5.97103e-07	no
	F36A2.13	F36A2.13	I	exon 23	8830877	8831191	314	10	12.56	229.656	26.767	531.1	59.783	2.31259	0.118497	0	no
	C23F12.1	C23F12.1	X	exon 18	9407091	9407232	141	5	5.64	323.956	43.903	742.634	80.18	2.29239	0.177636	3.45057e-13	no
	R01E6.3b	cah-4	X	exon 3	13543309	13543408	99	3	3.96	321.852	41.987	736.055	76.681	2.28694	0.220431	5.27479e-09	yes
	R01E6.3b	cah-4	X	exon 5	13543309	13543408	99	3	3.96	321.852	41.987	736.055	76.681	2.28694	0.220431	5.27479e-09	yes
	R01E6.3a	cah-4	X	exon 3	13543309	13543408	99	3	3.96	321.852	41.987	736.055	76.681	2.28694	0.220431	5.27479e-09	yes
	F36A2.13	F36A2.13	I	exon 21	8831600	8832028	428	15	17.12	218.455	27.33	493.863	53.961	2.26071	0.0969558	0	no
	C23F12.1	C23F12.1	X	exon 15	9405854	9405986	132	4	5.28	281.986	39.457	633.971	71.164	2.24824	0.201651	6.01379e-10	no
	M02D8.4b.3	asns-2	X	exon 1	8750719	8750880	161	5	6.44	330.633	43.095	743	81.681	2.2472	0.171361	3.38174e-13	yes
	M02D8.4b.2	asns-2	X	exon 1	8750719	8750880	161	5	6.44	330.633	43.095	743	81.681	2.2472	0.171361	3.38174e-13	yes
	T15D6.8	T15D6.8	I	exon 2	12389956	12390129	173	5	6.92	155.655	22.526	345.356	42.175	2.21873	0.18789	8.79139e-11	no
	M02D8.4b.1	asns-2	X	exon 2	8750719	8750908	189	6	7.56	293.75	39.861	638.213	74.71	2.17264	0.158957	1.61871e-13	yes
	R01E6.3b	cah-4	X	exon 4	13543460	13543674	214	7	8.56	306.738	38.929	665.874	65.257	2.17082	0.131564	0	yes
	R01E6.3a	cah-4	X	exon 4	13543460	13543674	214	7	8.56	306.738	38.929	665.874	65.257	2.17082	0.131564	0	yes
	K06A4.3	gsnl-1	V	exon 3	9497427	9497528	101	3	4.04	242.889	32.489	523.777	58.02	2.15645	0.216228	8.87935e-08	no
	W01F3.3 (a-e)	mlt-11	V	exon 5	20663389	20663926	537	20	21.48	933.9	129.349	2006.94	208.358	2.14899	0.0831768	0	yes
	T04D1.4	chd-7	I	exon 2	4697503	4697868	365	11	14.6	662.591	73.514	1410.37	137.814	2.12856	0.0948845	0	no
	F36A2.13	F36A2.13	I	exon 25	8829748	8829991	243	9	9.72	242.957	27.937	515.753	51.138	2.12282	0.107438	0	no
	F26H11.2f	nurf-1	II	exon 1	14405225	14405783	558	20	22.32	2436.27	309.697	5168.22	718.735	2.12137	0.0893739	0	yes
	C08B6.4b	C08B6.4	V	exon 3	10115494	10115780	286	8	11.44	667.854	122.186	1412.97	183.367	2.11569	0.167783	2.93894e-11	yes
	C08B6.4a	C08B6.4	V	exon 3	10115494	10115780	286	8	11.44	667.854	122.186	1412.97	183.367	2.11569	0.167783	2.93894e-11	yes
	F14E5.5	lips-10	II	exon 2	8440460	8440640	180	5	7.2	533.399	66.834	1121.37	143.682	2.1023	0.168492	6.06364e-11	no
	F36A2.13	F36A2.13	I	exon 13	8835259	8835418	159	5	6.36	263.833	35.749	554.378	60.223	2.10125	0.163197	1.49951e-11	no
	F07C3.7	aat-2	V	exon 3	9245245	9245341	96	3	3.84	104.963	13.283	219.481	20.429	2.09103	0.189652	8.77782e-09	no
	F36A2.13	F36A2.13	I	exon 15	8834140	8834603	463	17	18.52	202.111	24.999	421.922	46.727	2.08758	0.0840602	0	no
	C23F12.1	C23F12.1	X	exon 19	9407283	9407429	146	4	5.84	465.069	62.597	967.737	93.786	2.08085	0.172561	3.7631e-10	no
	F26H11.2f	nurf-1	II	exon 3	14406414	14406835	421	15	16.84	2433.59	283.359	5011.22	658.525	2.05919	0.0933489	0	yes
	F26H11.2e	nurf-1	II	exon 3	14406414	14406835	421	15	16.84	2433.59	283.359	5011.22	658.525	2.05919	0.0933489	0	yes
	F26H11.2d	nurf-1	II	exon 9	14406414	14406835	421	15	16.84	2433.59	283.359	5011.22	658.525	2.05919	0.0933489	0	yes
	F26H11.2c	nurf-1	II	exon 22	14406414	14406835	421	15	16.84	2433.59	283.359	5011.22	658.525	2.05919	0.0933489	0	yes
	F26H11.2g	nurf-1	II	exon 2	14406550	14406835	285	10	11.4	2590.72	313.495	5312.49	718.726	2.05058	0.117701	0	yes
	C23F12.1a	fln-2	X	exon 39	9421124	9421234	110	3	4.4	752.925	98.545	1541.15	192.705	2.04688	0.213914	9.88438e-07	yes
	F26H11.2g	nurf-1	II	exon 4	14407114	14407244	130	4	5.2	2813.56	317.298	5730.65	726.544	2.0368	0.172804	1.97478e-09	yes
	F26H11.2f	nurf-1	II	exon 5	14407114	14407244	130	4	5.2	2813.56	317.298	5730.65	726.544	2.0368	0.172804	1.97478e-09	yes
	F26H11.2e	nurf-1	II	exon 5	14407114	14407244	130	4	5.2	2813.56	317.298	5730.65	726.544	2.0368	0.172804	1.97478e-09	yes
	F26H11.2d	nurf-1	II	exon 11	14407114	14407244	130	4	5.2	2813.56	317.298	5730.65	726.544	2.0368	0.172804	1.97478e-09	yes
	F26H11.2c	nurf-1	II	exon 24	14407114	14407244	130	4	5.2	2813.56	317.298	5730.65	726.544	2.0368	0.172804	1.97478e-09	yes
	H01A20.1	nhr-3	X	exon 5	14559473	14559660	187	6	7.48	614.472	82.615	1241.23	143.537	2.02	0.146245	3.06777e-12	no
	ZK180.5a	ZK180.5	IV	exon 3	4515540	4516851	1311	46	52.44	499.384	74.106	1006.44	136.406	2.01537	0.0597191	0	yes
	K12G11.3	sodh-1	V	exon 3	11889025	11889430	405	14	16.2	161.163	19.895	323.175	38.224	2.00527	0.0916243	0	no
	F25E5.8a.1	F25E5.8	V	exon 1	7435737	7436239	502	18	20.08	275.127	32.755	551.463	77.21	2.00439	0.0868269	0	yes
	C23F12.1	C23F12.1	X	exon 4	9399508	9399661	153	5	6.12	222.767	27.665	444.611	50.972	1.99586	0.150858	4.07616e-11	no
	F26H11.2g	nurf-1	II	exon 3	14406886	14407065	179	6	7.16	2388.65	265.662	4752.09	731.738	1.98945	0.154273	1.42132e-10	yes
	F26H11.2f	nurf-1	II	exon 4	14406886	14407065	179	6	7.16	2388.65	265.662	4752.09	731.738	1.98945	0.154273	1.42132e-10	yes
	F26H11.2e	nurf-1	II	exon 4	14406886	14407065	179	6	7.16	2388.65	265.662	4752.09	731.738	1.98945	0.154273	1.42132e-10	yes
	F26H11.2d	nurf-1	II	exon 10	14406886	14407065	179	6	7.16	2388.65	265.662	4752.09	731.738	1.98945	0.154273	1.42132e-10	yes
	F26H11.2c	nurf-1	II	exon 23	14406886	14407065	179	6	7.16	2388.65	265.662	4752.09	731.738	1.98945	0.154273	1.42132e-10	yes
	C23F12.1a	fln-2	X	exon 50	9425303	9425959	656	24	26.24	754.866	103.451	1489.52	164.367	1.97323	0.0708696	0	yes
	K12G11.3	sodh-1	V	exon 2	11888427	11888975	548	20	21.92	283.722	35.156	559.189	60.803	1.9709	0.0726524	0	no
	F36A2.13	F36A2.13	I	exon 21	8836068	8836496	428	16	17.12	227.427	30.926	445.729	50.537	1.95988	0.0867485	0	no
	F36A2.13	F36A2.13	I	exon 22	8831244	8831552	308	11	12.32	161.136	20.294	312.424	34.603	1.93888	0.0980461	0	no
	Y65B4BL.1a	Y65B4BL.1	I	exon 1	530974	531094	120	4	4.8	1578.74	192.179	3059.96	341.563	1.93823	0.160059	4.57932e-09	yes
	C05E4.9b	icl-1	V	exon 3	725982	726809	827	32	33.08	614.097	88.093	1189.42	144.515	1.93686	0.0643666	0	yes
	C05E4.9a	icl-1	V	exon 3	725982	726809	827	32	33.08	614.097	88.093	1189.42	144.515	1.93686	0.0643666	0	yes
	F21C10.7	F21C10.7	V	exon 15	9116119	9116309	190	6	7.6	636.231	97.916	1231.49	139.152	1.93561	0.150872	5.59888e-10	no
	C23F12.1a	fln-2	X	exon 48	9424868	9424985	117	4	4.68	743.959	97.755	1438.94	180.511	1.93417	0.175686	1.05341e-07	yes
	C23F12.1a	fln-2	X	exon 37	9420641	9420862	221	8	8.84	1112.26	129.732	2149.35	226.314	1.93242	0.107357	0	yes
	F36A2.13	F36A2.13	I	exon 19	8832265	8832937	672	19	26.88	245.553	35.189	473.082	58.232	1.9266	0.0834975	0	no
	F36A2.13	F36A2.13	I	exon 2	8838454	8838592	138	5	5.52	265.645	30.648	511.21	59.904	1.92441	0.141525	6.49871e-11	no
	T04D1.4	chd-7	I	exon 3	4696678	4697190	512	19	20.48	670.573	78.644	1288.64	149.281	1.9217	0.0726753	0	no
	F36A2.13	F36A2.13	I	exon 27	8828857	8829078	221	8	8.84	130.035	18.477	249.104	28.407	1.91567	0.123398	1.16795e-13	no
	F26H11.2c	nurf-1	II	exon 25	14407293	14407798	505	18	20.2	1790.95	289.382	3428.22	579.277	1.9142	0.105484	0	yes
	T04D1.4	chd-7	I	exon 4	4695387	4696052	665	19	26.6	547.76	74.341	1047.07	125.77	1.91154	0.07948	0	no
	C23F12.1a	fln-2	X	exon 35	9419309	9419511	202	6	8.08	1027.27	124.523	1959.99	211.149	1.90796	0.126318	6.5814e-13	yes
	F55A12.9d.1	pqn-44	I	exon 1	5376159	5376344	185	6	7.4	344.472	39.36	656.648	99.064	1.90624	0.147278	7.58929e-10	yes
	F55A12.9c	pqn-44	I	exon 2	5376159	5376344	185	6	7.4	344.472	39.36	656.648	99.064	1.90624	0.147278	7.58929e-10	yes
	F55A12.9b	pqn-44	I	exon 2	5376159	5376344	185	6	7.4	344.472	39.36	656.648	99.064	1.90624	0.147278	7.58929e-10	yes
	F55A12.9a	pqn-44	I	exon 2	5376159	5376344	185	6	7.4	344.472	39.36	656.648	99.064	1.90624	0.147278	7.58929e-10	yes
	M02D8.4b.2	asns-2	X	exon 6	8748709	8749407	698	25	27.92	259.551	36.234	492.989	57.638	1.89939	0.0691734	0	yes
	M02D8.4b.1	asns-2	X	exon 6	8748709	8749407	698	25	27.92	259.551	36.234	492.989	57.638	1.89939	0.0691734	0	yes
	H19M22.2c	let-805	III	exon 7	2680404	2680505	101	3	4.04	1234.02	162.094	2338.54	228.19	1.89506	0.179033	5.74965e-07	yes
	H19M22.2b	let-805	III	exon 26	2680404	2680505	101	3	4.04	1234.02	162.094	2338.54	228.19	1.89506	0.179033	5.74965e-07	yes
	H19M22.2a	let-805	III	exon 24	2680404	2680505	101	3	4.04	1234.02	162.094	2338.54	228.19	1.89506	0.179033	5.74965e-07	yes
	F13G11.1c.1	dmd-6	IV	exon 1	14619417	14619639	222	8	8.88	785.945	90.225	1488.36	154.4	1.89372	0.103594	0	yes
	ZK180.5b	ZK180.5	IV	exon 3	4515675	4516851	1176	41	47.04	466.559	64.176	883.507	116.114	1.89367	0.0562629	0	yes
	C24A8.3	pqn-15	X	exon 17	4305195	4305395	200	7	8	583.326	67.141	1104.26	122.53	1.89304	0.114392	5.77316e-15	no
	C05E4.9b	icl-1	V	exon 2	727215	727688	473	18	18.92	500.148	69.74	942.824	103.199	1.88509	0.0787639	0	yes
	C05E4.9a	icl-1	V	exon 2	727215	727688	473	18	18.92	500.148	69.74	942.824	103.199	1.88509	0.0787639	0	yes
	F55A12.9d.2	pqn-44	I	exon 3	5376159	5376342	183	5	7.32	359.967	40.88	677.478	103.291	1.88206	0.160013	3.54005e-08	yes
	C23F12.1a	fln-2	X	exon 47	9424404	9424817	413	15	16.52	694.212	97.627	1303.56	143.665	1.87775	0.0866253	0	yes
	H11E01.3	H11E01.3	X	exon 15	1613529	1613643	114	3	4.56	199.741	24.572	374.722	37.363	1.87604	0.171517	3.26272e-07	no
	Y37E11C.1a	unc-33	IV	exon 8	3522964	3523859	895	33	35.8	744.843	89.562	1392.21	164.436	1.86913	0.0548414	0	yes
	Y37E11C.1b	unc-33	IV	exon 4	3522964	3523859	895	33	35.8	744.843	89.562	1392.21	164.436	1.86913	0.0548414	0	yes
	M02D8.4b.3	asns-2	X	exon 5	8748705	8749407	702	26	28.08	277.673	38.781	518.985	63.091	1.86905	0.0678708	0	yes
	M02D8.4a	asns-2	X	exon 5	8748709	8749411	702	26	28.08	258.677	35.973	483.169	56.845	1.86785	0.0667264	0	yes
	F55A12.9d (1,2)	pqn-44	I	exon 6	5374362	5374711	349	12	13.96	227.338	30.703	424.514	87.7	1.86733	0.133047	7.08056e-11	yes
	F55A12.9c	pqn-44	I	exon 5	5374362	5374711	349	12	13.96	227.338	30.703	424.514	87.7	1.86733	0.133047	7.08056e-11	yes
	F55A12.9b	pqn-44	I	exon 5	5374362	5374711	349	12	13.96	227.338	30.703	424.514	87.7	1.86733	0.133047	7.08056e-11	yes
	F55A12.9a	pqn-44	I	exon 5	5374362	5374711	349	12	13.96	227.338	30.703	424.514	87.7	1.86733	0.133047	7.08056e-11	yes
	Y43F8B.2 (b,c1)	Y43F8B.2	V	exon 3	19520745	19521046	301	11	12.04	539.803	63.835	1007.81	136.845	1.867	0.10136	0	yes
	Y43F8B.2a	Y43F8B.2	V	exon 6	19520745	19521046	301	11	12.04	539.803	63.835	1007.81	136.845	1.867	0.10136	0	yes
	Y43F8B.2e1	Y43F8B.2	V	exon 2	19520745	19521046	301	11	12.04	539.803	63.835	1007.81	136.845	1.867	0.10136	0	yes
	Y43F8B.2d	Y43F8B.2	V	exon 5	19520745	19521046	301	11	12.04	539.803	63.835	1007.81	136.845	1.867	0.10136	0	yes
	H08J11.2	H08J11.2	X	exon 7	9097270	9097393	123	4	4.92	517.556	69.46	964.818	118.481	1.86418	0.169558	3.45695e-07	no
	R01E6.3b	cah-4	X	exon 5	13543928	13544155	227	8	9.08	334.445	42.215	622.25	68.334	1.86055	0.110056	5.32907e-15	yes
	R01E6.3a	cah-4	X	exon 5	13543928	13544155	227	8	9.08	334.445	42.215	622.25	68.334	1.86055	0.110056	5.32907e-15	yes
	C15H9.1	nnt-1	X	exon 1	6122273	6122397	124	3	4.96	275.5	33.404	509.926	50.578	1.85091	0.1674	3.71332e-07	no
	K08C7.5	fmo-2	IV	exon 4	10683059	10683373	314	11	12.56	340.975	38.281	630.49	76.884	1.84908	0.0924112	0	no
	H01A20.1	nhr-3	X	exon 3	14558825	14559234	409	14	16.36	622.949	87.816	1151.79	141.43	1.84893	0.09238	0	no
	C25A11.4d	ajm-1	X	exon 12	9110197	9110617	420	15	16.8	1079.03	179.52	1992.4	278.605	1.84647	0.103614	2.22045e-16	yes
	C25A11.4a	ajm-1	X	exon 13	9110197	9110617	420	15	16.8	1079.03	179.52	1992.4	278.605	1.84647	0.103614	2.22045e-16	yes
	C09D1.1g	unc-89	I	exon 25	4062676	4064835	2159	82	86.36	265.676	38.341	490.144	56.058	1.84489	0.0375156	0	yes
	C09D1.1f	unc-89	I	exon 23	4062676	4064835	2159	82	86.36	265.676	38.341	490.144	56.058	1.84489	0.0375156	0	yes
	C09D1.1e	unc-89	I	exon 23	4062676	4064835	2159	82	86.36	265.676	38.341	490.144	56.058	1.84489	0.0375156	0	yes
	C09D1.1b	unc-89	I	exon 25	4062676	4064835	2159	82	86.36	265.676	38.341	490.144	56.058	1.84489	0.0375156	0	yes
	C09D1.1a	unc-89	I	exon 25	4062676	4064835	2159	82	86.36	265.676	38.341	490.144	56.058	1.84489	0.0375156	0	yes
	M02D8.4c	asns-2	X	exon 5	8748705	8749411	706	27	28.24	276.161	38.454	508.566	62.199	1.84156	0.0656823	0	yes
	T27C4.4d	lin-40	V	exon 3	3705193	3707210	2017	69	80.68	1424.87	174.51	2623.15	308.65	1.84098	0.0376408	0	yes
	T27C4.4c	lin-40	V	exon 3	3705193	3707225	2032	70	81.28	1407.8	173.286	2589.44	306.453	1.83935	0.0375395	0	yes
	C23F12.1	C23F12.1	X	exon 16	9406274	9406380	106	3	4.24	393.741	47.444	724.039	68.934	1.83887	0.163041	2.67287e-07	no
	H01A20.1	nhr-3	X	exon 6	14560587	14560848	261	9	10.44	409.376	49.978	751.981	80.434	1.8369	0.0993838	0	no
	C23F12.1a	fln-2	X	exon 51	9426007	9426172	165	5	6.6	1052.12	132.354	1931.4	199.204	1.83571	0.133548	3.90478e-10	yes
	T12D8.1	set-16	III	exon 11	13651188	13653026	1838	69	73.52	1063.99	129.316	1953.17	227.786	1.8357	0.0372244	0	no
	C23F12.1a	fln-2	X	exon 46	9424155	9424331	176	6	7.04	1040.21	173.432	1904.92	249.307	1.83128	0.158464	1.55532e-07	yes
	M05D6.4	lact-4	II	exon 1	8480246	8480402	156	5	6.24	177.233	23.97	324.334	45.514	1.82999	0.159501	1.95422e-07	no
	H14N18.1c	unc-23	V	exon 3	8938256	8938526	270	9	10.8	466.148	64.859	852.684	103.265	1.82921	0.112473	1.67422e-13	yes
	H14N18.1b.2	unc-23	V	exon 3	8938256	8938526	270	9	10.8	466.148	64.859	852.684	103.265	1.82921	0.112473	1.67422e-13	yes
	H14N18.1b.1	unc-23	V	exon 3	8938256	8938526	270	9	10.8	466.148	64.859	852.684	103.265	1.82921	0.112473	1.67422e-13	yes
	H14N18.1a	unc-23	V	exon 4	8938256	8938526	270	9	10.8	466.148	64.859	852.684	103.265	1.82921	0.112473	1.67422e-13	yes
	M02D8.4c	asns-2	X	exon 3	8750134	8750223	89	3	3.56	351.018	45.587	639.556	58.882	1.822	0.167462	9.17266e-07	yes
	M02D8.4b.3	asns-2	X	exon 3	8750134	8750223	89	3	3.56	351.018	45.587	639.556	58.882	1.822	0.167462	9.17266e-07	yes
	M02D8.4b.2	asns-2	X	exon 3	8750134	8750223	89	3	3.56	351.018	45.587	639.556	58.882	1.822	0.167462	9.17266e-07	yes
	M02D8.4b.1	asns-2	X	exon 3	8750134	8750223	89	3	3.56	351.018	45.587	639.556	58.882	1.822	0.167462	9.17266e-07	yes
	M02D8.4a	asns-2	X	exon 3	8750134	8750223	89	3	3.56	351.018	45.587	639.556	58.882	1.822	0.167462	9.17266e-07	yes
	F46G10.6	mxl-3	X	exon 2	13350294	13350567	273	9	10.92	208.803	24.665	380.062	46.443	1.82019	0.10312	1.77636e-15	no
	K10G9.1	vglu-2	III	exon 2	10295246	10295392	146	4	5.84	618.61	66.712	1125.15	120.554	1.81884	0.138249	3.16237e-09	no
	D2045.1b	atx-2	III	exon 2	10464754	10464975	221	8	8.84	1092.65	119.874	1986.27	262.143	1.81786	0.110303	1.21902e-13	yes
	D2045.1a	atx-2	III	exon 7	10464754	10464975	221	8	8.84	1092.65	119.874	1986.27	262.143	1.81786	0.110303	1.21902e-13	yes
	Y46H3A.3 (a,b)	hsp-16.2	V	exon 2	1804161	1804580	419	15	16.76	155.626	21.951	282.644	56.743	1.81617	0.115055	1.30496e-12	yes
	W03F11.6c	afd-1	I	exon 16	2201731	2202169	438	16	17.52	1669.36	194.363	3028.06	327.719	1.81391	0.0720858	0	yes
	W03F11.6b	afd-1	I	exon 3	2201731	2202169	438	16	17.52	1669.36	194.363	3028.06	327.719	1.81391	0.0720858	0	yes
	W03F11.6a	afd-1	I	exon 16	2201731	2202169	438	16	17.52	1669.36	194.363	3028.06	327.719	1.81391	0.0720858	0	yes
	H01A20.1	nhr-3	X	exon 2	14558634	14558773	139	4	5.56	482.069	64.999	873.014	87.647	1.81097	0.152217	9.94413e-08	no
	W01F3.3 (a,b,d,e)	mlt-11	V	exon 4	20662932	20663318	386	13	15.44	298.645	37.027	540.658	61.887	1.81037	0.0847272	0	yes
	W03F11.6b	afd-1	I	exon 6	2207321	2207839	518	20	20.72	1173.09	129.682	2123.5	226.235	1.81017	0.0621437	0	yes
	W03F11.6a	afd-1	I	exon 19	2207321	2207839	518	20	20.72	1173.09	129.682	2123.5	226.235	1.81017	0.0621437	0	yes
	F38H12.3	nhr-181	V	exon 1	4094868	4095105	237	6	9.48	359.695	38.049	649.398	62.964	1.80541	0.105763	2.64233e-14	no
	W03F11.6c	afd-1	I	exon 17	2203575	2203865	290	11	11.6	1020.94	122.819	1841.78	186.756	1.80401	0.0855783	0	yes
	W03F11.6b	afd-1	I	exon 4	2203575	2203865	290	11	11.6	1020.94	122.819	1841.78	186.756	1.80401	0.0855783	0	yes
	W03F11.6a	afd-1	I	exon 17	2203575	2203865	290	11	11.6	1020.94	122.819	1841.78	186.756	1.80401	0.0855783	0	yes
	C23F12.1a	fln-2	X	exon 11	9423878	9424102	224	8	8.96	902.833	125.803	1625.29	178.623	1.80021	0.112953	1.39622e-12	yes
	M02D8.4b.3	asns-2	X	exon 7	8748402	8748661	259	8	10.36	315.292	51.034	567.457	73.334	1.79978	0.131797	1.29293e-09	yes
	M02D8.4a	asns-2	X	exon 7	8748421	8748661	240	8	9.6	315.292	51.034	567.457	73.334	1.79978	0.131797	1.29293e-09	yes
	C05E4.9a	icl-1	V	exon 4	724665	725913	1248	47	49.92	726.494	103.269	1303.97	157.159	1.79488	0.0487921	0	yes
	Y63D3A.5.2	tfg-1	I	exon 2	14102031	14102211	180	6	7.2	938.259	91.451	1678.16	168.141	1.78859	0.102067	1.11022e-14	yes
	Y63D3A.5.1	tfg-1	I	exon 1	14102031	14102211	180	6	7.2	938.259	91.451	1678.16	168.141	1.78859	0.102067	1.11022e-14	yes
	F36A2.13	F36A2.13	I	exon 16	8833923	8834094	171	6	6.84	202.222	25.282	360.852	42.405	1.78443	0.124995	3.47966e-10	no
	F52G3.1	F52G3.1	X	exon 3	16965107	16965241	134	4	5.36	1637.85	178.4	2921.67	370.224	1.78385	0.149038	1.4454e-07	no
	K08E7.5c	K08E7.5	IV	exon 3	12575448	12575960	512	19	20.48	207.079	26.244	368.947	42.237	1.78167	0.0698069	0	yes
	M05D6.4	lact-4	II	exon 3	8478530	8478729	199	6	7.96	170.87	19.781	304.426	54.075	1.78162	0.154214	4.01124e-07	no
	Y71G12B.11 (a,b)	tln-1	I	exon 5	1728206	1728819	613	22	24.52	1306.43	186.991	2327.16	264.542	1.78132	0.0694162	0	yes
	F28F8.2	acs-2	V	exon 2	15567545	15567796	251	9	10.04	207.784	32.022	370.099	43.933	1.78117	0.115497	1.34617e-11	no
	Y37E11C.1a	unc-33	IV	exon 9	3524372	3524763	391	14	15.64	1274.72	138.28	2267.24	223.55	1.77862	0.069684	0	yes
	Y37E11C.1b	unc-33	IV	exon 5	3524372	3524763	391	14	15.64	1274.72	138.28	2267.24	223.55	1.77862	0.069684	0	yes
	Y105C5B.28b	gln-3	IV	exon 2	16170034	16170195	161	5	6.44	661.157	84.811	1174.91	150.881	1.77705	0.144251	7.17198e-08	yes
	Y105C5B.28a	gln-3	IV	exon 3	16170034	16170195	161	5	6.44	661.157	84.811	1174.91	150.881	1.77705	0.144251	7.17198e-08	yes
	T12D8.1	set-16	III	exon 12	13653712	13654068	356	13	14.24	1773.66	206.663	3148.26	360.526	1.775	0.0804274	0	no
	F28F9.1	zag-1	IV	exon 6	3860315	3860486	171	5	6.84	535.199	71.759	949.934	106.448	1.77492	0.138703	2.312e-08	no
	M02D8.4b.2	asns-2	X	exon 7	8748373	8748661	288	9	11.52	293.235	48.243	519.863	69.381	1.77285	0.12519	6.68205e-10	yes
	M02D8.4b.1	asns-2	X	exon 7	8748373	8748661	288	9	11.52	293.235	48.243	519.863	69.381	1.77285	0.12519	6.68205e-10	yes
	Y71G12B.11a	tln-1	I	exon 8	1734448	1738528	4080	157	163.2	1076.28	141.256	1905.2	214.773	1.77016	0.0244422	0	yes
	Y71G12B.11c	tln-1	I	exon 4	1734448	1738528	4080	157	163.2	1076.28	141.256	1905.2	214.773	1.77016	0.0244422	0	yes
	F15D3.1a	dys-1	I	exon 25	11542043	11542186	143	5	5.72	275.189	32.456	486.555	51.472	1.76808	0.125275	8.7258e-10	yes
	W09B6.1a.2	pod-2	II	exon 5	1147827	1148004	177	6	7.08	962.547	103.584	1698.43	200.078	1.76451	0.114938	2.90059e-11	yes
	W09B6.1a.1	pod-2	II	exon 5	1147827	1148004	177	6	7.08	962.547	103.584	1698.43	200.078	1.76451	0.114938	2.90059e-11	yes
	C09G12.3	srz-78	IV	exon 5	3492974	3493213	239	8	9.56	168.576	22.555	297.264	58.568	1.76338	0.148481	2.72847e-07	no
	Y39G8C.1	Y39G8C.1	II	exon 8	14080899	14081052	153	4	6.12	984.878	128.993	1735.5	197.783	1.76215	0.152966	6.27873e-07	no
	F15E6.1	set-9	IV	exon 4	4309802	4310705	903	15	36.12	1700.77	242.074	2995.55	406.405	1.76129	0.0894216	0	no
	Y65B4BL.1b	Y65B4BL.1	I	exon 4	531967	532556	589	22	23.56	1503.31	209.76	2643.73	307.526	1.75861	0.0681109	0	yes
	W01F3.3 (a-h)	mlt-11	V	exon 9	20666233	20666487	254	9	10.16	1837.46	245.889	3229.84	381.86	1.75778	0.104627	4.3987e-13	yes
	Y65B4BL.1b	Y65B4BL.1	I	exon 5	532622	532855	233	8	9.32	1085.4	156.735	1907.38	179.285	1.7573	0.10705	1.50258e-12	yes
	Y51A2D.15 (a-c)	grdn-1	V	exon 13	18607092	18607388	296	11	11.84	972.46	113.779	1708.23	187.755	1.75661	0.0850228	0	yes
	Y51A2D.15c	grdn-1	V	exon 11	18607092	18607388	296	11	11.84	972.46	113.779	1708.23	187.755	1.75661	0.0850228	0	yes
	C25A11.4e	ajm-1	X	exon 6	9109023	9109195	172	5	6.88	1796.84	229.594	3148.33	338.687	1.75215	0.130883	9.09968e-09	yes
	C25A11.4d	ajm-1	X	exon 10	9109023	9109195	172	5	6.88	1796.84	229.594	3148.33	338.687	1.75215	0.130883	9.09968e-09	yes
	C25A11.4c	ajm-1	X	exon 10	9109023	9109195	172	5	6.88	1796.84	229.594	3148.33	338.687	1.75215	0.130883	9.09968e-09	yes
	C25A11.4a	ajm-1	X	exon 10	9109023	9109195	172	5	6.88	1796.84	229.594	3148.33	338.687	1.75215	0.130883	9.09968e-09	yes
	D2063.1	D2063.1	V	exon 3	4327687	4327841	154	5	6.16	307.267	40.243	537.4	63.591	1.74897	0.138059	5.79591e-08	no
	F14E5.5	lips-10	II	exon 1	8439073	8439302	229	7	9.16	247.389	41.677	431.873	52.727	1.74572	0.137279	5.56754e-08	no
	M05D6.4	lact-4	II	exon 2	8479274	8479794	520	19	20.8	254.009	39.586	443.401	87.685	1.74561	0.100832	1.41887e-13	no
	F36A2.13	F36A2.13	I	exon 18	8832988	8833684	696	26	27.84	194.979	24.913	339.132	39.938	1.73933	0.0592732	0	no
	Y48C3A.8a.1	sam-10	II	exon 3	13329370	13329616	246	6	9.84	506.046	54.608	879.583	100.908	1.73815	0.111761	3.9831e-11	yes
	Y48C3A.8a.2	sam-10	II	exon 2	13329370	13329616	246	6	9.84	506.046	54.608	879.583	100.908	1.73815	0.111761	3.9831e-11	yes
	C23F12.1a	fln-2	X	exon 29	9415382	9415557	175	6	7	828.019	103.369	1437.41	167.953	1.73596	0.121181	1.25354e-09	yes
	F52G3.1	F52G3.1	X	exon 9	16969031	16969271	240	9	9.6	900.21	116.116	1562.25	197.989	1.73543	0.104605	2.05747e-12	no
	Y46G5A.4	snrp-200	II	exon 9	12729369	12729529	160	5	6.4	563.901	59.258	978.479	112.213	1.7352	0.120705	1.12302e-09	no
	ZK377.1	wrt-6	X	exon 5	3481940	3482147	207	7	8.28	283.976	39.311	492.301	58.456	1.7336	0.119502	8.31484e-10	no
	C23F12.1a	fln-2	X	exon 24	9413060	9413334	274	10	10.96	716.245	90.529	1241.12	122.553	1.73282	0.0878895	0	yes
	M02D8.4c	asns-2	X	exon 5	8749462	8749867	405	14	16.2	340.02	65.789	588.98	88.144	1.73219	0.113241	1.00776e-10	yes
	M02D8.4b.3	asns-2	X	exon 5	8749462	8749867	405	14	16.2	340.02	65.789	588.98	88.144	1.73219	0.113241	1.00776e-10	yes
	M02D8.4b.2	asns-2	X	exon 5	8749462	8749867	405	14	16.2	340.02	65.789	588.98	88.144	1.73219	0.113241	1.00776e-10	yes
	M02D8.4b.1	asns-2	X	exon 5	8749462	8749867	405	14	16.2	340.02	65.789	588.98	88.144	1.73219	0.113241	1.00776e-10	yes
	M02D8.4a	asns-2	X	exon 5	8749462	8749867	405	14	16.2	340.02	65.789	588.98	88.144	1.73219	0.113241	1.00776e-10	yes
	C05E4.9b	icl-1	V	exon 4	724175	725913	1738	63	69.52	625.363	91.587	1081.62	138.144	1.72959	0.0423443	0	yes
	F28F8.2	acs-2	V	exon 1	15567197	15567495	298	10	11.92	261.056	33.897	450.722	49.959	1.72653	0.0932103	6.43929e-15	no
	F36A2.13	F36A2.13	I	exon 3	8838045	8838395	350	12	14	225.241	26.007	388.741	41.854	1.72589	0.0786552	0	no
	F38H12.3	nhr-181	V	exon 3	4097442	4097573	131	4	5.24	257.208	30.487	443.305	40.861	1.72353	0.129395	2.24967e-08	no
	F13G11.1b.1	dmd-6	IV	exon 6	14622828	14623925	1097	39	43.88	840.397	106.06	1448.43	158.017	1.72351	0.0460392	0	yes
	F13G11.1b.2	dmd-6	IV	exon 5	14622828	14623925	1097	39	43.88	840.397	106.06	1448.43	158.017	1.72351	0.0460392	0	yes
	C23F12.1a	fln-2	X	exon 40	9421303	9421566	263	9	10.52	580.031	76.156	998.611	93.256	1.72165	0.0924641	5.9952e-15	yes
	F13G11.1b.2	dmd-6	IV	exon 4	14622475	14622708	233	8	9.32	951.756	107.294	1638.01	176.849	1.72104	0.0949799	3.15303e-14	yes
	F13G11.1b.1	dmd-6	IV	exon 5	14622475	14622708	233	8	9.32	951.756	107.294	1638.01	176.849	1.72104	0.0949799	3.15303e-14	yes
	C01G8.9a	let-526	I	exon 5	5304444	5305084	640	23	25.6	509.321	70.906	876.171	108.125	1.72027	0.0667324	0	yes
	Y43H11AL.3	pqn-85	II	exon 5	253212	253368	156	5	6.24	247.533	34.603	425.522	44.953	1.71905	0.134706	9.40091e-08	no
	T27C4.4d	lin-40	V	exon 4	3707846	3708002	156	4	6.24	930.694	112.032	1598.66	168.993	1.71771	0.13759	1.82511e-07	yes
	F28F8.2	acs-2	V	exon 3	15567846	15568507	661	25	26.44	236.14	30.578	405.584	43.382	1.71756	0.0576943	0	no
	C25A11.4e	ajm-1	X	exon 7	9109609	9109731	122	4	4.88	1032.34	122.768	1772.81	172.392	1.71728	0.131903	5.39037e-08	yes
	C25A11.4c	ajm-1	X	exon 11	9109609	9109731	122	4	4.88	1032.34	122.768	1772.81	172.392	1.71728	0.131903	5.39037e-08	yes
	C25A11.4a	ajm-1	X	exon 11	9109609	9109731	122	4	4.88	1032.34	122.768	1772.81	172.392	1.71728	0.131903	5.39037e-08	yes
	T12D8.1	set-16	III	exon 8	13647736	13647989	253	9	10.12	764.439	101.658	1311.94	138.521	1.71622	0.0971391	1.66755e-13	no
	T15D6.7	glct-3	I	exon 4	12388379	12388779	400	14	16	142.186	17.041	242.671	29.646	1.70672	0.078063	0	no
	Y95B8A.8	Y95B8A.8	I	exon 9	865733	865936	203	7	8.12	719.159	86.916	1227.02	183.714	1.70619	0.124085	1.26143e-08	no
	Y67A6A.2a	nhr-62	I	exon 2	9840985	9841111	126	4	5.04	269.417	31.178	459.194	44.762	1.7044	0.128945	4.68732e-08	yes
	R06A10.2b	gsa-1	I	exon 7	1072675	1072918	243	9	9.72	669.495	96.706	1141.07	147.915	1.70438	0.110264	1.67916e-10	yes
	R06A10.2a	gsa-1	I	exon 7	1072675	1072918	243	9	9.72	669.495	96.706	1141.07	147.915	1.70438	0.110264	1.67916e-10	yes
	F21C10.7	F21C10.7	V	exon 14	9115768	9116052	284	9	11.36	507.352	81.285	864.29	104.114	1.70353	0.113824	6.37388e-10	no
	C23F12.1a	fln-2	X	exon 32	9416855	9418485	1630	60	65.2	768.119	108.448	1308.27	146.365	1.70321	0.0396096	0	yes
	T05A10.1j	sma-9	X	exon 7	10776212	10776349	137	5	5.48	999.123	113.73	1701.56	162.447	1.70305	0.113151	5.18665e-10	yes
	T05A10.1i	sma-9	X	exon 7	10776212	10776349	137	5	5.48	999.123	113.73	1701.56	162.447	1.70305	0.113151	5.18665e-10	yes
	T05A10.1g	sma-9	X	exon 7	10776212	10776349	137	5	5.48	999.123	113.73	1701.56	162.447	1.70305	0.113151	5.18665e-10	yes
	T05A10.1f	sma-9	X	exon 7	10776212	10776349	137	5	5.48	999.123	113.73	1701.56	162.447	1.70305	0.113151	5.18665e-10	yes
	T05A10.1e	sma-9	X	exon 7	10776212	10776349	137	5	5.48	999.123	113.73	1701.56	162.447	1.70305	0.113151	5.18665e-10	yes
	T05A10.1d	sma-9	X	exon 7	10776212	10776349	137	5	5.48	999.123	113.73	1701.56	162.447	1.70305	0.113151	5.18665e-10	yes
	T05A10.1c	sma-9	X	exon 4	10776212	10776349	137	5	5.48	999.123	113.73	1701.56	162.447	1.70305	0.113151	5.18665e-10	yes
	T05A10.1a	sma-9	X	exon 5	10776212	10776349	137	5	5.48	999.123	113.73	1701.56	162.447	1.70305	0.113151	5.18665e-10	yes
	Y48C3A.12	Y48C3A.12	II	exon 7	13387207	13387464	257	10	10.28	613.883	72.448	1045.15	128.28	1.70252	0.0916718	1.82077e-14	no
	F59A2.6	F59A2.6	III	exon 6	3419715	3419918	203	5	8.12	750.777	85.164	1276.39	168.763	1.70009	0.132453	1.25303e-07	no
	M02D8.4c	asns-2	X	exon 2	8750533	8750671	138	4	5.52	202.014	22.158	342.792	39.946	1.69687	0.135777	2.8598e-07	yes
	M02D8.4b.3	asns-2	X	exon 2	8750533	8750671	138	4	5.52	202.014	22.158	342.792	39.946	1.69687	0.135777	2.8598e-07	yes
	M02D8.4b.2	asns-2	X	exon 2	8750533	8750671	138	4	5.52	202.014	22.158	342.792	39.946	1.69687	0.135777	2.8598e-07	yes
	M02D8.4b.1	asns-2	X	exon 2	8750533	8750671	138	4	5.52	202.014	22.158	342.792	39.946	1.69687	0.135777	2.8598e-07	yes
	M02D8.4a	asns-2	X	exon 2	8750533	8750671	138	4	5.52	202.014	22.158	342.792	39.946	1.69687	0.135777	2.8598e-07	yes
	R07E3.6	R07E3.6	X	exon 9	10320767	10320904	137	4	5.48	480.361	64.63	814.097	79.31	1.69476	0.14076	7.98263e-07	no
	F36A2.13	F36A2.13	I	exon 11	8835669	8836019	350	11	14	206.823	32.608	350.515	43.919	1.69476	0.102907	1.46481e-11	no
	C01G8.9b	let-526	I	exon 1	5304386	5304788	402	13	16.08	370.846	53.336	628.23	85.891	1.69405	0.0932341	9.76996e-14	yes
	H19M22.2b	let-805	III	exon 24	2679403	2679810	407	14	16.28	509.659	62.517	862.997	92.776	1.69328	0.0738137	0	yes
	Y111B2A.22a	ssl-1	III	exon 14	12737550	12738284	734	24	29.36	848.766	115.355	1437.03	170.208	1.69308	0.062304	0	yes
	Y111B2A.22c	ssl-1	III	exon 4	12737550	12738284	734	24	29.36	848.766	115.355	1437.03	170.208	1.69308	0.062304	0	yes
	Y111B2A.22d	ssl-1	III	exon 12	12737550	12738284	734	24	29.36	848.766	115.355	1437.03	170.208	1.69308	0.062304	0	yes
	C18C4.5b	C18C4.5	V	exon 4	5554715	5554965	250	9	10	295.259	42.795	499.377	69.118	1.69132	0.112986	9.44019e-10	yes
	C18C4.5a	C18C4.5	V	exon 4	5554715	5554965	250	9	10	295.259	42.795	499.377	69.118	1.69132	0.112986	9.44019e-10	yes
	F49E12.12	F49E12.12	II	exon 3	8382334	8382496	162	5	6.48	148.845	21.899	250.356	27.972	1.68199	0.138964	9.21648e-07	no
	R01E6.3b	cah-4	X	exon 6	13544203	13544513	310	10	12.4	263.833	38.437	443.583	49.324	1.6813	0.0974414	2.71161e-12	yes
	R01E6.3a	cah-4	X	exon 6	13544203	13544513	310	10	12.4	263.833	38.437	443.583	49.324	1.6813	0.0974414	2.71161e-12	yes
	T15D6.7	glct-3	I	exon 3	12388006	12388334	328	12	13.12	202.963	28.671	341.213	42.891	1.68116	0.0917681	1.14797e-13	no
	T12D8.1	set-16	III	exon 10	13649385	13650565	1180	44	47.2	1223.83	148.712	2056.32	220.617	1.68023	0.0410603	0	no
	Y51A2D.15 (a-c)	grdn-1	V	exon 12	18606830	18607019	189	6	7.56	871.926	116.312	1463.42	199.671	1.67838	0.130747	2.11963e-07	yes
	Y51A2D.15c	grdn-1	V	exon 10	18606830	18607019	189	6	7.56	871.926	116.312	1463.42	199.671	1.67838	0.130747	2.11963e-07	yes
	Y63D3A.5.2	tfg-1	I	exon 3	14102264	14102409	145	5	5.8	773.367	99.7	1295.63	146.735	1.67532	0.128565	1.49882e-07	yes
	Y63D3A.5.1	tfg-1	I	exon 3	14102264	14102409	145	5	5.8	773.367	99.7	1295.63	146.735	1.67532	0.128565	1.49882e-07	yes
	C23F12.1a	fln-2	X	exon 33	9418540	9418794	254	9	10.16	635.574	89.085	1061.58	126.499	1.67027	0.102427	5.99565e-11	yes
	R11F4.1.2	R11F4.1	II	exon 4	4092884	4093922	1038	39	41.52	759.946	102.449	1268.33	162.357	1.66897	0.0496826	0	yes
	R11F4.1.1	R11F4.1	II	exon 4	4092884	4093922	1038	39	41.52	759.946	102.449	1268.33	162.357	1.66897	0.0496826	0	yes
	W10C8.2	pop-1	I	exon 2	2828481	2828599	118	4	4.72	790.946	80.574	1319.89	139.921	1.66875	0.122672	4.99439e-08	no
	W06H8.6	W06H8.6	V	exon 3	6226297	6226444	147	4	5.88	378.333	44.421	631.264	70.615	1.66854	0.135293	7.75565e-07	no
	Y51H4A.12	set-26	IV	exon 4	16653036	16653942	906	14	36.24	529.98	59.181	884.215	102.292	1.66839	0.0716949	0	no
	T09E11.5	oac-44	I	exon 1	12356930	12357054	124	4	4.96	248.903	29.033	415.209	46.368	1.66816	0.13469	7.02366e-07	no
	K10G6.3a	sea-2	II	exon 6	3965646	3966080	434	15	17.36	778.918	91.376	1298.05	148.334	1.66647	0.0704673	0	yes
	K10G6.3c	sea-2	II	exon 6	3965646	3966080	434	15	17.36	778.918	91.376	1298.05	148.334	1.66647	0.0704673	0	yes
	K10G6.3d	sea-2	II	exon 3	3965646	3966080	434	15	17.36	778.918	91.376	1298.05	148.334	1.66647	0.0704673	0	yes
	R02C2.3	oac-39	V	exon 4	250218	250345	127	4	5.08	190.208	23.895	316.972	31.649	1.66645	0.13371	6.21852e-07	no
	C23F12.1a	fln-2	X	exon 30	9416220	9416419	199	6	7.96	670.462	89.768	1116.9	111.714	1.66586	0.113659	4.67353e-09	yes
	F52E10.5	ifa-3	X	exon 6	16267171	16267458	287	9	11.48	202.099	29.009	335.969	66.434	1.6624	0.135399	9.97149e-07	no
	F52G3.1	F52G3.1	X	exon 6	16967866	16968032	166	6	6.64	645.287	78.834	1072.57	149.287	1.66216	0.12567	1.3713e-07	no
	F15E6.1	set-9	IV	exon 7	4314490	4315268	778	10	31.12	782.711	94.704	1300.42	147.533	1.66143	0.0871432	3.19744e-14	no
	T05A10.1b	sma-9	X	exon 8	10776212	10776448	236	8	9.44	666.487	90.424	1107.02	128.704	1.66098	0.104924	2.98462e-10	yes
	Y95B8A.8	Y95B8A.8	I	exon 10	866765	866860	95	3	3.8	1441.26	137.588	2393.53	241.947	1.66073	0.133311	7.18632e-07	no
	Y48C3A.12	Y48C3A.12	II	exon 5	13382385	13382579	194	7	7.76	1138.6	121.828	1889.98	170.506	1.65991	0.087806	5.66214e-14	no
	K10G6.3a	sea-2	II	exon 7	3966380	3969211	2831	97	113.24	910.012	107.324	1509.62	168.721	1.6589	0.0273677	0	yes
	K10G6.3b	sea-2	II	exon 6	3966380	3969211	2831	97	113.24	910.012	107.324	1509.62	168.721	1.6589	0.0273677	0	yes
	K10G6.3c	sea-2	II	exon 7	3966380	3969211	2831	97	113.24	910.012	107.324	1509.62	168.721	1.6589	0.0273677	0	yes
	K10G6.3d	sea-2	II	exon 4	3966380	3969211	2831	97	113.24	910.012	107.324	1509.62	168.721	1.6589	0.0273677	0	yes
	C30C11.4.2	hsp-110	III	exon 4	8445360	8445846	486	18	19.44	529.565	66.827	878.327	119.808	1.65858	0.0726447	0	yes
	C30C11.4.1	hsp-110	III	exon 4	8445360	8445846	486	18	19.44	529.565	66.827	878.327	119.808	1.65858	0.0726447	0	yes
	Y113G7B.23 (a-c)	swsn-1	V	exon 4	20239454	20239874	420	15	16.8	375.052	44.065	621.76	75.465	1.6578	0.0723066	0	yes
	R10F2.1	R10F2.1	III	exon 15	2933330	2933524	194	6	7.76	486.574	49.361	805.666	81.329	1.65579	0.0967411	1.21134e-11	no
	Y57A10A.18 (a-e)	pqn-87	II	exon 5	12219297	12219571	274	9	10.96	413.747	45.712	684.593	75.444	1.65462	0.0860668	2.81997e-14	yes
	W09B6.1b	pod-2	II	exon 5	1152023	1152208	185	6	7.4	867.87	111.504	1432.39	164.391	1.65046	0.116079	2.09895e-08	yes
	W09B6.1 (a.2, a.1)	pod-2	II	exon 7	1152023	1152208	185	6	7.4	867.87	111.504	1432.39	164.391	1.65046	0.116079	2.09895e-08	yes
	F21C10.7	F21C10.7	V	exon 25	9121484	9121666	182	6	7.28	473.241	64.11	780.925	94.372	1.65016	0.122298	1.05938e-07	no
	Y111B2A.22d	ssl-1	III	exon 11	12735127	12735637	510	20	20.4	1162	142.336	1917.21	221.933	1.64991	0.0621783	0	yes
	Y111B2A.22a	ssl-1	III	exon 13	12735127	12735637	510	20	20.4	1162	142.336	1917.21	221.933	1.64991	0.0621783	0	yes
	Y111B2A.22c	ssl-1	III	exon 3	12735127	12735637	510	20	20.4	1162	142.336	1917.21	221.933	1.64991	0.0621783	0	yes
	T04D1.4	chd-7	I	exon 5	4693271	4695339	2068	78	82.72	493.137	70.29	813.058	96.103	1.64875	0.0345681	0	no
	F52G3.1	F52G3.1	X	exon 5	16966403	16966615	212	7	8.48	1313.02	160.317	2161.97	263.726	1.64657	0.107412	1.7495e-09	no
	T13F3.3	nhr-127	V	exon 7	16263527	16263693	166	5	6.64	142.767	18.522	234.789	23.377	1.64456	0.120278	8.37088e-08	no
	F36A2.13	F36A2.13	I	exon 7	8837304	8837508	204	7	8.16	307.46	32.935	505.302	53.499	1.64347	0.0935567	6.07492e-12	no
	W03F11.6b	afd-1	I	exon 5	2204926	2205309	383	13	15.32	969.038	140.967	1591.77	198.582	1.64262	0.0873077	1.83187e-13	yes
	W03F11.6a	afd-1	I	exon 18	2204926	2205309	383	13	15.32	969.038	140.967	1591.77	198.582	1.64262	0.0873077	1.83187e-13	yes
	T13H2.5b	spat-3	X	exon 2	4598942	4599097	155	5	6.2	156.5	18.707	256.667	29.319	1.64004	0.121267	1.30626e-07	yes
	T13H2.5a	spat-3	X	exon 12	4598942	4599097	155	5	6.2	156.5	18.707	256.667	29.319	1.64004	0.121267	1.30626e-07	yes
	ZC13.3	mam-1	X	exon 7	885881	885990	109	4	4.36	143.556	15.475	235.389	24.317	1.6397	0.122409	1.73273e-07	no
	Y37E11C.1a	unc-33	IV	exon 6	3518272	3518492	220	7	8.8	984.388	99.354	1612.79	170.177	1.63837	0.0904196	1.66467e-12	yes
	Y37E11C.1b	unc-33	IV	exon 2	3518272	3518492	220	7	8.8	984.388	99.354	1612.79	170.177	1.63837	0.0904196	1.66467e-12	yes
	M02H5.3	nhr-201	V	exon 7	466546	466742	196	6	7.84	299.426	38.296	490.491	63.219	1.6381	0.12143	1.48109e-07	no
	F52G3.1	F52G3.1	X	exon 10	16969335	16969495	160	6	6.4	1222.46	176.842	2000.79	213.543	1.63668	0.120119	1.15506e-07	no
	H01A20.1	nhr-3	X	exon 4	14559291	14559422	131	5	5.24	499.844	63.654	818	88.274	1.63651	0.122165	1.88592e-07	no
	K10G6.3a	sea-2	II	exon 4	3964180	3965274	1094	40	43.76	908.886	105.265	1486.31	166.93	1.63531	0.0417146	0	yes
	K10G6.3b	sea-2	II	exon 4	3964180	3965274	1094	40	43.76	908.886	105.265	1486.31	166.93	1.63531	0.0417146	0	yes
	K10G6.3c	sea-2	II	exon 4	3964180	3965274	1094	40	43.76	908.886	105.265	1486.31	166.93	1.63531	0.0417146	0	yes
	C01G8.9a	let-526	I	exon 4	5305254	5306450	1196	42	47.84	693.601	89.733	1133.47	130.522	1.63418	0.0436735	0	yes
	F46G11.3	tag-257	X	exon 6	5784740	5785105	365	13	14.6	309.82	39.455	506.133	55.092	1.63364	0.0759051	0	no
	K11C4.3b	unc-70	V	exon 7	6888530	6888726	196	6	7.84	2334.43	277.684	3813.58	369.739	1.63362	0.102345	5.97619e-10	yes
	K11C4.3a	unc-70	V	exon 7	6888530	6888726	196	6	7.84	2334.43	277.684	3813.58	369.739	1.63362	0.102345	5.97619e-10	yes
	Y37A1B.5a	Y37A1B.5	IV	exon 1	14051169	14051364	195	6	7.8	569.407	58.989	928.084	103.283	1.62991	0.101171	4.77759e-10	yes
	W09B6.1a.2	pod-2	II	exon 6	1148360	1151904	3544	132	141.76	894.399	110.052	1457.67	157.884	1.62978	0.0232536	0	yes
	W09B6.1a.1	pod-2	II	exon 6	1148360	1151904	3544	132	141.76	894.399	110.052	1457.67	157.884	1.62978	0.0232536	0	yes
	F32B4.4b.2	F32B4.4	I	exon 3	11523805	11523990	185	6	7.4	573.648	69.627	934.583	86.114	1.62919	0.101356	5.37431e-10	yes
	F32B4.4b.1	F32B4.4	I	exon 2	11523805	11523990	185	6	7.4	573.648	69.627	934.583	86.114	1.62919	0.101356	5.37431e-10	yes
	F32B4.4a	F32B4.4	I	exon 5	11523805	11523990	185	6	7.4	573.648	69.627	934.583	86.114	1.62919	0.101356	5.37431e-10	yes
	F18E3.11	F18E3.11	V	exon 1(all)	7413246	7413651	405	14	16.2	354.96	81.346	577.956	85.731	1.62823	0.118794	1.2339e-07	no
	W03F11.6c	afd-1	I	exon 18	2204926	2205351	425	14	17	935.035	136.636	1521.37	191.968	1.62707	0.0839563	8.08242e-14	yes
	Y51H1A.6a	mcd-1	II	exon 6	13895753	13896682	929	35	37.16	580.459	71.485	944.338	116.947	1.62688	0.0480278	0	yes
	T28F4.2	asic-2	I	exon 3	7480723	7480872	149	5	5.96	105.778	13.065	172.033	21.044	1.62636	0.126436	7.27226e-07	no
	Y113G7B.23 (a-c)	swsn-1	V	exon 5	20236476	20237441	965	36	38.6	553.114	68.749	898.9	110.371	1.62516	0.0473232	0	yes
	F11C3.3.3	unc-54	I	exon 8	14856427	14856651	224	8	8.96	419.375	64.647	681.431	77.102	1.62487	0.109851	1.28277e-08	yes
	F11C3.3.2	unc-54	I	exon 8	14856427	14856651	224	8	8.96	419.375	64.647	681.431	77.102	1.62487	0.109851	1.28277e-08	yes
	F11C3.3.1	unc-54	I	exon 8	14856427	14856651	224	8	8.96	419.375	64.647	681.431	77.102	1.62487	0.109851	1.28277e-08	yes
	Y46G5A.1c	tbc-17	II	exon 2	12716659	12716830	171	5	6.84	594.833	68.889	966.012	101.939	1.62401	0.113792	4.16438e-08	yes
	Y46G5A.1 (a,b)	tbc-17	II	exon 8	12716659	12716830	171	5	6.84	594.833	68.889	966.012	101.939	1.62401	0.113792	4.16438e-08	yes
	F52G3.1	F52G3.1	X	exon 12	16970242	16970507	265	10	10.6	1688.46	225.568	2741.9	318.39	1.6239	0.0908969	6.70242e-12	no
	T07C4.10	T07C4.10	III	exon 2	10321075	10321246	171	5	6.84	588.61	62.541	955.134	103.546	1.62269	0.110157	1.57885e-08	no
	W09B6.1(a.1,a.2,b)	pod-2	II	exon 4	1145661	1147572	1911	73	76.44	961.485	116.571	1557.8	179.51	1.6202	0.0317187	0	yes
	K08E7.5a	K08E7.5	IV	exon 4	12574551	12575960	1409	53	56.36	194.506	25.239	315.11	36.931	1.62005	0.0389102	0	yes
	K08E7.5a	K08E7.5	IV	exon 3	12574071	12574271	200	6	8	190.342	26.244	308.343	33.181	1.61994	0.115669	8.33951e-08	yes
	T07A5.6a	unc-69	III	exon 1	10318874	10319021	147	5	5.88	830.076	96.205	1344.54	154.616	1.61978	0.11827	1.60201e-07	yes
	C12D5.2	nhr-152	V	exon 3	7686788	7687068	280	8	11.2	275.25	40.433	445.611	49.385	1.61893	0.105325	4.19256e-09	no
	F21C10.7	F21C10.7	V	exon 22	9119625	9120485	860	32	34.4	386.616	58.108	625.713	81.069	1.61844	0.0567724	0	no
	C08B6.4b	C08B6.4	V	exon 5	10116024	10116679	655	11	26.2	607.974	95.221	982.57	132.967	1.61614	0.100861	1.00379e-09	yes
	C08B6.4a	C08B6.4	V	exon 5	10116024	10116679	655	11	26.2	607.974	95.221	982.57	132.967	1.61614	0.100861	1.00379e-09	yes
	F01G12.5b.2	let-2	X	exon 18	16380828	16381029	201	7	8.04	336.651	44.877	544.032	66.929	1.61601	0.110796	2.70006e-08	yes
	T07A5.6b	unc-69	III	exon 2	10319087	10319224	137	5	5.48	2153.47	282.81	3479.72	394.633	1.61587	0.125391	9.03452e-07	yes
	T07A5.6a	unc-69	III	exon 2	10319087	10319224	137	5	5.48	2153.47	282.81	3479.72	394.633	1.61587	0.125391	9.03452e-07	yes
	T05A10.1j	sma-9	X	exon 2	10779613	10779770	157	5	6.28	487.122	56.364	786.588	85.245	1.61477	0.114485	7.88028e-08	yes
	T05A10.1i	sma-9	X	exon 16	10779613	10779770	157	5	6.28	487.122	56.364	786.588	85.245	1.61477	0.114485	7.88028e-08	yes
	T05A10.1h	sma-9	X	exon 5	10779613	10779770	157	5	6.28	487.122	56.364	786.588	85.245	1.61477	0.114485	7.88028e-08	yes
	T05A10.1g	sma-9	X	exon 16	10779613	10779770	157	5	6.28	487.122	56.364	786.588	85.245	1.61477	0.114485	7.88028e-08	yes
	T05A10.1f	sma-9	X	exon 16	10779613	10779770	157	5	6.28	487.122	56.364	786.588	85.245	1.61477	0.114485	7.88028e-08	yes
	T05A10.1e	sma-9	X	exon 16	10779613	10779770	157	5	6.28	487.122	56.364	786.588	85.245	1.61477	0.114485	7.88028e-08	yes
	T05A10.1d	sma-9	X	exon 16	10779613	10779770	157	5	6.28	487.122	56.364	786.588	85.245	1.61477	0.114485	7.88028e-08	yes
	T05A10.1c	sma-9	X	exon 13	10779613	10779770	157	5	6.28	487.122	56.364	786.588	85.245	1.61477	0.114485	7.88028e-08	yes
	T05A10.1a	sma-9	X	exon 14	10779613	10779770	157	5	6.28	487.122	56.364	786.588	85.245	1.61477	0.114485	7.88028e-08	yes
	Y55B1BL.1	Y55B1BL.1	III	exon 3	403501	403706	205	7	8.2	388.23	48.384	626.897	65.427	1.61476	0.099211	5.77473e-10	no
	F32B4.4b.2	F32B4.4	I	exon 4	11524060	11524556	496	18	19.84	742.726	75.851	1199.13	123.212	1.61449	0.0551289	0	yes
	F32B4.4b.1	F32B4.4	I	exon 3	11524060	11524556	496	18	19.84	742.726	75.851	1199.13	123.212	1.61449	0.0551289	0	yes
	F32B4.4a	F32B4.4	I	exon 6	11524060	11524556	496	18	19.84	742.726	75.851	1199.13	123.212	1.61449	0.0551289	0	yes
	R11F4.1.2	R11F4.1	II	exon 2	4092160	4092322	162	6	6.48	855.388	93.051	1380.53	159.162	1.61392	0.104439	4.14603e-09	yes
	R11F4.1.1	R11F4.1	II	exon 2	4092160	4092322	162	6	6.48	855.388	93.051	1380.53	159.162	1.61392	0.104439	4.14603e-09	yes
	F55A12.9d (1,2)	pqn-44	I	exon 7	5373985	5374297	312	11	12.48	180.429	21.947	291.01	36.751	1.61288	0.0852684	6.5925e-13	yes
	F55A12.9c	pqn-44	I	exon 6	5373985	5374297	312	11	12.48	180.429	21.947	291.01	36.751	1.61288	0.0852684	6.5925e-13	yes
	F55A12.9b	pqn-44	I	exon 6	5373985	5374297	312	11	12.48	180.429	21.947	291.01	36.751	1.61288	0.0852684	6.5925e-13	yes
	F55A12.9a	pqn-44	I	exon 6	5373985	5374297	312	11	12.48	180.429	21.947	291.01	36.751	1.61288	0.0852684	6.5925e-13	yes
	Y55F3AL.1	plx-1	IV	exon 5	965737	965982	245	9	9.8	955.012	108.343	1535.73	167.764	1.60808	0.0844196	5.88862e-13	yes
	F28F9.1	zag-1	IV	exon 2	3856565	3857107	542	20	21.68	621.789	71.22	999.745	110.05	1.60785	0.0571146	0	no
	K08C7.5	fmo-2	IV	exon 5	10683419	10684357	938	36	37.52	209.137	26.557	336.156	43.748	1.60735	0.0487104	0	no
	ZC101.2 (d,f)	unc-52	II	exon 15	14657532	14657813	281	10	11.24	187.878	21.744	301.411	37.726	1.60429	0.0864841	2.80198e-12	yes
	ZC101.2 (a,e,o)	unc-52	II	exon 17	14657532	14657813	281	10	11.24	187.878	21.744	301.411	37.726	1.60429	0.0864841	2.80198e-12	yes
	ZC101.2k	unc-52	II	exon 14	14657532	14657813	281	10	11.24	187.878	21.744	301.411	37.726	1.60429	0.0864841	2.80198e-12	yes
	ZC101.2 (l,m)	unc-52	II	exon 16	14657532	14657813	281	10	11.24	187.878	21.744	301.411	37.726	1.60429	0.0864841	2.80198e-12	yes
	D2045.1b	atx-2	III	exon 3	10465211	10465620	409	15	16.36	1587.1	174.081	2545.51	270.803	1.60387	0.063278	0	yes
	D2045.1a	atx-2	III	exon 8	10465211	10465620	409	15	16.36	1587.1	174.081	2545.51	270.803	1.60387	0.063278	0	yes
	Y71H2AM.17	swsn-3	III	exon 6	2766121	2766323	202	7	8.08	471.214	53.932	755.619	74.554	1.60356	0.0915866	4.39755e-11	no
	T12D8.1	set-16	III	exon 5	13645672	13646317	645	23	25.8	1087.11	123.659	1741.55	216.888	1.60199	0.0563413	0	no
	Y37E11C.1a	unc-33	IV	exon 10	3525374	3526598	1224	35	48.96	765.768	120.923	1225.67	162.268	1.60057	0.0557505	0	yes
	Y105C5B.28a	gln-3	IV	exon 2	16170409	16170582	173	6	6.92	777.649	77.605	1243.33	146.816	1.59883	0.100913	2.9539e-09	yes
	T21H8.1 (a,b)	hlb-1	X	exon 6	13868781	13869026	245	8	9.8	271.736	32.72	434.361	56.07	1.59847	0.0997635	1.98712e-09	yes
	F53B3.5	F53B3.5	X	exon 3	2877381	2877524	143	4	5.72	588.736	65.482	940.458	95.57	1.59742	0.120332	6.87825e-07	no
	C36E8.3	pxd-1	III	exon 4	4007818	4007979	161	5	6.44	389.778	43.016	621.99	72.727	1.59575	0.114742	2.07891e-07	no
	C34E11.3 (a,b)	tag-241	X	exon 10	11829372	11829577	205	7	8.2	253.254	34.531	403.984	44.605	1.59517	0.105781	1.83944e-08	yes
	F52B10.1	nmy-1	X	exon 17	2917144	2917304	160	5	6.4	1282.36	151.512	2043.26	202.559	1.59336	0.109902	6.70059e-08	no
	M02H5.5	nhr-203	V	exon 5	460629	460838	209	6	8.36	193.778	24.52	308.704	34.232	1.59308	0.109425	5.96069e-08	no
	W01F3.3 (a-h)	mlt-11	V	exon 2	20662545	20662676	131	4	5.24	1365.32	135.883	2175	192.464	1.59304	0.106076	2.26206e-08	yes
	Y71G12B.11 (a,b)	tln-1	I	exon 4	1726667	1727127	460	17	18.4	2243.66	283.576	3573.99	362.221	1.59293	0.0625899	0	yes
	F42G4.3b	zyx-1	II	exon 3	13068913	13069091	178	6	7.12	502.481	61.951	800.269	84.747	1.59264	0.105673	2.04459e-08	yes
	F42G4.3a.2	zyx-1	II	exon 9	13068913	13069091	178	6	7.12	502.481	61.951	800.269	84.747	1.59264	0.105673	2.04459e-08	yes
	F42G4.3a.1	zyx-1	II	exon 8	13068913	13069091	178	6	7.12	502.481	61.951	800.269	84.747	1.59264	0.105673	2.04459e-08	yes
	F59A2.2 (a,b)	F59A2.2	III	exon 3	3406761	3407012	251	9	10.04	430.296	56.427	685.136	74.181	1.59224	0.0902572	5.31872e-11	yes
	C34E11.3 (a,b)	tag-241	X	exon 16	11832204	11832538	334	11	13.36	336.445	52.025	535.474	64.228	1.59156	0.0939109	2.99156e-10	yes
	F01G12.5b.2	let-2	X	exon 16	16381634	16382425	791	29	31.64	415.939	58.484	661.253	81.845	1.58978	0.0553007	0	yes
	F01G12.5b.1	let-2	X	exon 16	16381634	16382425	791	29	31.64	415.939	58.484	661.253	81.845	1.58978	0.0553007	0	yes
	F01G12.5a	let-2	X	exon 16	16381634	16382425	791	29	31.64	415.939	58.484	661.253	81.845	1.58978	0.0553007	0	yes
	ZK377.1	wrt-6	X	exon 9	3482783	3483072	289	10	11.56	298.394	32.215	474.328	54.738	1.5896	0.0794373	1.15241e-13	no
	Y51A2D.15 (a-c)	grdn-1	V	exon 11	18604728	18605645	917	35	36.68	1190.02	140.777	1891.64	217.871	1.58958	0.0443619	0	yes
	Y51A2D.15c	grdn-1	V	exon 9	18604728	18605645	917	35	36.68	1190.02	140.777	1891.64	217.871	1.58958	0.0443619	0	yes
	F32H2.5	fasn-1	I	exon 3	8984109	8984344	235	7	9.4	1036.58	156.032	1647.47	217.87	1.58933	0.120362	9.76553e-07	no
	F46G11.3	tag-257	X	exon 2	5783553	5783780	227	8	9.08	388.722	47.906	617.507	63.626	1.58856	0.0902208	6.86777e-11	no
	C23F12.1a	fln-2	X	exon 41	9421677	9422156	479	18	19.16	673.262	94.583	1068.97	115.641	1.58774	0.0663556	0	yes
	T05A10.1j	sma-9	X	exon 6	10775754	10776163	409	15	16.36	1039.9	125.945	1650.66	177.484	1.58732	0.0663766	0	yes
	T05A10.1i	sma-9	X	exon 6	10775754	10776163	409	15	16.36	1039.9	125.945	1650.66	177.484	1.58732	0.0663766	0	yes
	T05A10.1g	sma-9	X	exon 6	10775754	10776163	409	15	16.36	1039.9	125.945	1650.66	177.484	1.58732	0.0663766	0	yes
	T05A10.1f	sma-9	X	exon 6	10775754	10776163	409	15	16.36	1039.9	125.945	1650.66	177.484	1.58732	0.0663766	0	yes
	T05A10.1e	sma-9	X	exon 6	10775754	10776163	409	15	16.36	1039.9	125.945	1650.66	177.484	1.58732	0.0663766	0	yes
	T05A10.1d	sma-9	X	exon 6	10775754	10776163	409	15	16.36	1039.9	125.945	1650.66	177.484	1.58732	0.0663766	0	yes
	T05A10.1c	sma-9	X	exon 3	10775754	10776163	409	15	16.36	1039.9	125.945	1650.66	177.484	1.58732	0.0663766	0	yes
	T05A10.1b	sma-9	X	exon 7	10775754	10776163	409	15	16.36	1039.9	125.945	1650.66	177.484	1.58732	0.0663766	0	yes
	T05A10.1a	sma-9	X	exon 4	10775754	10776163	409	15	16.36	1039.9	125.945	1650.66	177.484	1.58732	0.0663766	0	yes
	H19M22.2b	let-805	III	exon 18	2674983	2675373	390	14	15.6	806.579	114.082	1279.98	145.855	1.58692	0.0770341	2.55351e-14	yes
	H19M22.2a	let-805	III	exon 18	2674983	2675373	390	14	15.6	806.579	114.082	1279.98	145.855	1.58692	0.0770341	2.55351e-14	yes
	W03F11.6d	afd-1	I	exon 13	2195400	2196667	1267	48	50.68	1092.62	133.053	1733.85	209.419	1.58688	0.039285	0	yes
	W03F11.6c	afd-1	I	exon 13	2195400	2196667	1267	48	50.68	1092.62	133.053	1733.85	209.419	1.58688	0.039285	0	yes
	W03F11.6a	afd-1	I	exon 13	2195400	2196667	1267	48	50.68	1092.62	133.053	1733.85	209.419	1.58688	0.039285	0	yes
	D2045.1b	atx-2	III	exon 1	10464341	10464700	359	13	14.36	1289.53	156.869	2045.14	269.263	1.58596	0.0788484	1.0747e-13	yes
	D2045.1a	atx-2	III	exon 6	10464341	10464700	359	13	14.36	1289.53	156.869	2045.14	269.263	1.58596	0.0788484	1.0747e-13	yes
	Y105C5B.28b	gln-3	IV	confusing	16167858	16168206	348	12	13.92	548.065	69.595	867.593	96.588	1.58301	0.0771718	4.19664e-14	yes
	Y71G12B.11a	tln-1	I	exon 9	1738828	1739211	383	13	15.32	1087.83	130.987	1721.12	177.462	1.58217	0.0695632	0	yes
	Y71G12B.11c	tln-1	I	exon 5	1738828	1739211	383	13	15.32	1087.83	130.987	1721.12	177.462	1.58217	0.0695632	0	yes
	Y51H4A.12	set-26	IV	exon 5	16650262	16652097	1835	25	73.4	464.196	61.233	734.38	86.448	1.58205	0.0559407	0	no
	B0350.2f.2	unc-44	IV	exon 18	6003302	6003532	230	8	9.2	741.222	111.218	1172.06	137.996	1.58125	0.106626	5.00115e-08	yes
	B0350.2f.1	unc-44	IV	exon 17	6003302	6003532	230	8	9.2	741.222	111.218	1172.06	137.996	1.58125	0.106626	5.00115e-08	yes
	Y55B1BL.1	Y55B1BL.1	III	exon 1	402449	402704	255	7	10.2	343.825	47.477	543.58	67.159	1.58098	0.11072	1.54359e-07	no
	F15E6.1	set-9	IV	exon 5	4311672	4313474	1802	25	72.08	1232.15	174.252	1946.68	298.089	1.5799	0.0658634	0	no
	Y51H4A.12	set-26	IV	exon 2	16655265	16655635	370	5	14.8	463.089	51.372	730.855	79.339	1.57822	0.109549	1.3047e-07	no
	K10G9.1	vglu-2	III	exon 9	10298066	10298568	502	19	20.08	266.339	35.823	420.009	52.961	1.57697	0.0667001	0	no
	W01F3.3 (a-h)	mlt-11	V	exon 12	20670157	20671860	1703	62	68.12	1465.14	190.443	2308.97	268.134	1.57593	0.0348853	0	yes
	F28F9.1	zag-1	IV	exon 1	3855837	3856002	165	5	6.6	611.867	75.06	964.1	105.861	1.57567	0.116014	6.9741e-07	no
	K10G9.1	vglu-2	III	exon 3	10295553	10296107	554	21	22.16	529.373	70.799	833.37	86.589	1.57426	0.0581801	0	no
	T12D8.1	set-16	III	exon 13	13654207	13655289	1082	41	43.28	1009.6	122.343	1587.54	178.299	1.57245	0.0405745	0	no
	C17D12.2	unc-75	I	exon 5	11597275	11597622	347	13	13.88	603.483	78.264	948.808	106.7	1.57222	0.0748509	2.08722e-14	no
	B0350.2b	B0350.2	IV	exon 6	5985077	5985366	289	9	11.56	720.808	123.128	1132.79	141.707	1.57156	0.110913	2.56118e-07	yes
	F52G3.1	F52G3.1	X	exon 13	16970728	16971566	838	30	33.52	651.489	90.021	1022.19	125.974	1.569	0.0530383	0	no
	Y48C3A.12	Y48C3A.12	II	exon 6	13383074	13383568	494	19	19.76	678.389	85.311	1064.14	105.493	1.56863	0.0576261	0	no
	F32B4.4b.2	F32B4.4	I	exon 5	11524788	11525545	757	28	30.28	635.073	74.604	995.045	107.248	1.56682	0.0472065	0	yes
	F32B4.4b.1	F32B4.4	I	exon 4	11524788	11525545	757	28	30.28	635.073	74.604	995.045	107.248	1.56682	0.0472065	0	yes
	F32B4.4a	F32B4.4	I	exon 7	11524788	11525545	757	28	30.28	635.073	74.604	995.045	107.248	1.56682	0.0472065	0	yes
	Y50D7A.6	klp-20	III	exon 7	223903	224074	171	5	6.84	412.722	39.314	646.356	73.28	1.56608	0.10371	4.80729e-08	no
	Y39G10AR.18b	dot-1.1	I	exon 2	2392473	2392709	236	8	9.44	261.125	33.66	408.882	49.534	1.56585	0.0979317	7.56007e-09	yes
	Y39G10AR.18a	dot-1.1	I	exon 10	2392473	2392709	236	8	9.44	261.125	33.66	408.882	49.534	1.56585	0.0979317	7.56007e-09	yes
	H01A20.1	nhr-3	X	exon 7	14560901	14561347	446	15	17.84	367.423	59.941	574.555	78.693	1.56374	0.0860042	5.57072e-11	no
	C01G8.9a	let-526	I	exon 3	5309092	5309491	399	14	15.96	399.968	57.258	624.746	70.085	1.56199	0.0759254	1.34337e-13	yes
	H14N18.1c	unc-23	V	exon 1	8937197	8937956	759	27	30.36	487.613	64.987	761.516	91.262	1.56172	0.0538693	0	yes
	H14N18.1b.2	unc-23	V	exon 1	8937207	8937956	749	27	29.96	487.613	64.987	761.516	91.262	1.56172	0.0538693	0	yes
	H14N18.1b.1	unc-23	V	exon 1	8937197	8937956	759	27	30.36	487.613	64.987	761.516	91.262	1.56172	0.0538693	0	yes
	H14N18.1a	unc-23	V	exon 2	8937207	8937956	749	27	29.96	487.613	64.987	761.516	91.262	1.56172	0.0538693	0	yes
	Y71G12B.11 (a,b)	tln-1	I	exon 3	1725048	1725439	391	14	15.64	1914.15	235.636	2988.7	323.873	1.56137	0.0684378	2.22045e-16	yes
	K10B3.10a	spc-1	X	exon 11	3118314	3118616	302	10	12.08	526.3	72.344	821.473	93.344	1.56085	0.0880273	1.87469e-10	yes
	K10B3.10b	spc-1	X	exon 12	3118314	3118616	302	10	12.08	526.3	72.344	821.473	93.344	1.56085	0.0880273	1.87469e-10	yes
	F09C8.2	F09C8.2	X	exon 3	16145642	16145895	253	9	10.12	354.599	39.197	553.044	60.27	1.55963	0.0806987	4.06675e-12	no
	C23F12.1a	fln-2	X	exon 34	9418845	9419027	182	6	7.28	483.491	60.137	753.927	75.314	1.55934	0.101556	3.63577e-08	yes
	Y39G8C.1	Y39G8C.1	II	exon 7	14079682	14080113	431	15	17.24	634.545	74.8	989.467	114.746	1.55933	0.0665771	0	no
	Y71G12B.11 (a,b)	tln-1	I	exon 6	1730818	1731574	756	28	30.24	1403.85	187.412	2187.91	257.493	1.5585	0.0524167	0	yes
	Y71G12B.11c	tln-1	I	exon 2	1730818	1731574	756	28	30.24	1403.85	187.412	2187.91	257.493	1.5585	0.0524167	0	yes
	F26H11.2c	nurf-1	II	exon 10	14396984	14397115	131	4	5.24	853.485	84.86	1329.38	141.448	1.55758	0.113413	8.81501e-07	yes
	F26H11.2b	nurf-1	II	exon 10	14396984	14397115	131	4	5.24	853.485	84.86	1329.38	141.448	1.55758	0.113413	8.81501e-07	yes
	F26H11.2a	nurf-1	II	exon 10	14396984	14397115	131	4	5.24	853.485	84.86	1329.38	141.448	1.55758	0.113413	8.81501e-07	yes
	Y51F10.3	Y51F10.3	I	exon 4 (last)	1973561	1973884	323	11	12.92	649.076	82.673	1010.96	111.482	1.55754	0.0791178	1.82943e-12	no
	Y111B2A.22a	ssl-1	III	exon 11	12732345	12732567	222	8	8.88	1214.17	162.096	1890.83	226.473	1.55729	0.0987518	1.66732e-08	yes
	Y111B2A.22d	ssl-1	III	exon 9	12732345	12732567	222	8	8.88	1214.17	162.096	1890.83	226.473	1.55729	0.0987518	1.66732e-08	yes
	F21C10.7	F21C10.7	V	exon 16	9116353	9116925	572	22	22.88	410.621	63.877	639.109	77.27	1.55644	0.0653783	0	no
	F21C10.7	F21C10.7	V	exon 19	9117447	9119080	1633	62	65.32	357.893	55.686	556.622	66.036	1.55527	0.0386475	0	no
	H19M22.2c	let-805	III	exon 4	2678147	2678647	500	18	20	845.793	123.982	1313.6	147.975	1.5531	0.0676755	2.22045e-16	yes
	H19M22.2b	let-805	III	exon 21	2678147	2678647	500	18	20	845.793	123.982	1313.6	147.975	1.5531	0.0676755	2.22045e-16	yes
	H19M22.2a	let-805	III	exon 21	2678147	2678647	500	18	20	845.793	123.982	1313.6	147.975	1.5531	0.0676755	2.22045e-16	yes
	Y57G11C.24d.5	eps-8	IV	exon 3?	14886582	14886796	214	7	8.56	490.857	60.075	762.056	86.895	1.5525	0.0981554	1.81428e-08	yes
	Y111B2A.14.2a	pqn-80	III	exon 16	12644904	12645189	285	10	11.4	491.011	68.419	762.195	85.666	1.5523	0.0878782	3.28272e-10	yes
	Y111B2A.14.1b	pqn-80	III	exon 17	12644904	12645189	285	10	11.4	491.011	68.419	762.195	85.666	1.5523	0.0878782	3.28272e-10	yes
	F59A2.6	F59A2.6	III	exon 5	3420206	3420430	224	7	8.96	854.929	101.748	1326.66	135.642	1.55178	0.0920249	2.02301e-09	no
	C30C11.4.2	hsp-110	III	exon 3	8446323	8446650	327	11	13.08	589.874	71.895	914.546	135.643	1.55041	0.0897404	8.60471e-10	yes
	C30C11.4.1	hsp-110	III	exon 3	8446323	8446650	327	11	13.08	589.874	71.895	914.546	135.643	1.55041	0.0897404	8.60471e-10	yes
	K08C7.5	fmo-2	IV	exon 3	10682765	10683008	243	8	9.72	199.944	25.514	309.875	38.29	1.54981	0.0973296	1.61442e-08	no
	F32B4.4a	F32B4.4	I	exon 9	11526309	11526550	241	9	9.64	554.376	71.46	859.142	98.436	1.54975	0.0890906	6.80138e-10	yes
	W09G3.6	W09G3.6	I	exon 6	13821310	13821570	260	8	10.4	255.535	30.759	395.882	46.75	1.54923	0.0923621	2.73996e-09	yes
	B0350.2f.2	unc-44	IV	exon 13	5984780	5984964	184	6	7.36	2274.33	269.904	3521.2	358.257	1.54823	0.0988026	2.87674e-08	yes
	B0350.2f.1	unc-44	IV	exon 12	5984780	5984964	184	6	7.36	2274.33	269.904	3521.2	358.257	1.54823	0.0988026	2.87674e-08	yes
	B0350.2e.2	unc-44	IV	exon 12	5984780	5984964	184	6	7.36	2274.33	269.904	3521.2	358.257	1.54823	0.0988026	2.87674e-08	yes
	B0350.2e.1	unc-44	IV	exon 11	5984780	5984964	184	6	7.36	2274.33	269.904	3521.2	358.257	1.54823	0.0988026	2.87674e-08	yes
	B0350.2d	unc-44	IV	exon 4	5984780	5984964	184	6	7.36	2274.33	269.904	3521.2	358.257	1.54823	0.0988026	2.87674e-08	yes
	B0350.2c.2	B0350.2	IV	exon 12	5984780	5984964	184	6	7.36	2274.33	269.904	3521.2	358.257	1.54823	0.0988026	2.87674e-08	yes
	B0350.2c.1	B0350.2	IV	exon 11	5984780	5984964	184	6	7.36	2274.33	269.904	3521.2	358.257	1.54823	0.0988026	2.87674e-08	yes
	B0350.2b	B0350.2	IV	exon 5	5984780	5984964	184	6	7.36	2274.33	269.904	3521.2	358.257	1.54823	0.0988026	2.87674e-08	yes
	F21C10.7	F21C10.7	V	exon 13	9115334	9115721	387	15	15.48	382.767	58.64	592.004	70.618	1.54664	0.0775376	1.78879e-12	no
	C17D12.2	unc-75	I	exon 4	11596935	11597096	161	5	6.44	497.711	57.093	769.666	83.189	1.54641	0.108999	5.35936e-07	no
	Y95B8A.8	Y95B8A.8	I	exon 7	861488	861921	433	16	17.32	895.504	108.59	1382.97	153.692	1.54435	0.0635048	0	no
	Y57G11C.24h	eps-8	IV	exon 3	14886576	14886796	220	8	8.8	510.917	60.918	788.778	92.754	1.54385	0.0914075	2.68627e-09	yes
	Y57G11C.24g	eps-8	IV	exon 3	14886576	14886796	220	8	8.8	510.917	60.918	788.778	92.754	1.54385	0.0914075	2.68627e-09	yes
	Y57G11C.24d.9	eps-8	IV	exon 3	14886576	14886796	220	8	8.8	510.917	60.918	788.778	92.754	1.54385	0.0914075	2.68627e-09	yes
	Y57G11C.24d.8	eps-8	IV	exon 2	14886576	14886796	220	8	8.8	510.917	60.918	788.778	92.754	1.54385	0.0914075	2.68627e-09	yes
	Y57G11C.24d.7	eps-8	IV	exon 3	14886576	14886796	220	8	8.8	510.917	60.918	788.778	92.754	1.54385	0.0914075	2.68627e-09	yes
	Y57G11C.24d.6	eps-8	IV	exon 2	14886575	14886796	221	8	8.84	510.917	60.918	788.778	92.754	1.54385	0.0914075	2.68627e-09	yes
	Y57G11C.24d.4	eps-8	IV	exon 3	14886575	14886796	221	8	8.84	510.917	60.918	788.778	92.754	1.54385	0.0914075	2.68627e-09	yes
	Y57G11C.24d.3	eps-8	IV	exon 3	14886577	14886796	219	8	8.76	510.917	60.918	788.778	92.754	1.54385	0.0914075	2.68627e-09	yes
	Y57G11C.24d.2	eps-8	IV	exon 3	14886575	14886796	221	8	8.84	510.917	60.918	788.778	92.754	1.54385	0.0914075	2.68627e-09	yes
	Y57G11C.24d.10	eps-8	IV	exon 3	14886576	14886796	220	8	8.8	510.917	60.918	788.778	92.754	1.54385	0.0914075	2.68627e-09	yes
	Y57G11C.24d.1	eps-8	IV	exon 1	14886575	14886796	221	8	8.84	510.917	60.918	788.778	92.754	1.54385	0.0914075	2.68627e-09	yes
	Y57G11C.24a.3	eps-8	IV	exon 3	14886576	14886796	220	8	8.8	510.917	60.918	788.778	92.754	1.54385	0.0914075	2.68627e-09	yes
	Y57G11C.24a.2	eps-8	IV	exon 3	14886576	14886796	220	8	8.8	510.917	60.918	788.778	92.754	1.54385	0.0914075	2.68627e-09	yes
	Y57G11C.24a.1	eps-8	IV	exon 2	14886576	14886796	220	8	8.8	510.917	60.918	788.778	92.754	1.54385	0.0914075	2.68627e-09	yes
	W01F3.3 (a-h)	mlt-11	V	exon 8	20665223	20666179	956	36	38.24	1557.46	202.169	2404.19	287.098	1.54366	0.0453786	0	yes
	C50E10.4 (a,b)	C50E10.4	II	exon 3	12340562	12341057	495	18	19.8	799.124	100.976	1233.07	142.529	1.54303	0.0622834	0	yes
	Y50D7A.8	Y50D7A.8	III	exon 5	336711	337010	299	10	11.96	397.4	45.875	612.944	75.091	1.54239	0.0821011	3.94016e-11	no
	T13F3.3	nhr-127	V	exon 6	16263260	16263476	216	7	8.64	305.857	37.865	471.588	57.308	1.54186	0.101096	8.32973e-08	no
	ZK1151.1 (a-d,f-h)	vab-10	I	exon 14	11774138	11774600	462	17	18.48	459.886	64.676	709.078	80.999	1.54186	0.067754	1.33227e-15	yes
	ZK1151.1e	vab-10	I	exon 13	11774138	11774600	462	17	18.48	459.886	64.676	709.078	80.999	1.54186	0.067754	1.33227e-15	yes
	ZK1151.1i	vab-10	I	exon 10	11774138	11774600	462	17	18.48	459.886	64.676	709.078	80.999	1.54186	0.067754	1.33227e-15	yes
	Y111B2A.22	ssl-1	III	exon 3	12733915	12734201	286	9	11.44	1598.44	196.421	2464.38	288.546	1.54175	0.0872286	5.27715e-10	yes
	Y37H9A.3	Y37H9A.3	I	exon 5	13784984	13785330	346	12	13.84	562.203	56.117	866.681	83.728	1.54158	0.0618177	0	no
	F55A12.7	apm-1	I	exon 6	5343191	5343411	220	7	8.8	171.96	20.104	265.048	29.468	1.54134	0.0939892	8.43393e-09	no
	R107.5a	R107.5	III	exon 3	9052086	9052280	194	6	7.76	257.213	30.733	396.426	44.447	1.54124	0.103097	1.52263e-07	no
	Y48C3A.12	Y48C3A.12	II	exon 3	13379026	13379392	366	12	14.64	1284.59	144.018	1979.19	188.763	1.54071	0.0654656	2.22045e-16	no
	K01B6.3	K01B6.3	III	exon 2	9302118	9302256	138	5	5.52	214.022	27.335	329.667	31.792	1.54034	0.110245	9.52126e-07	no
	Y63D3A.5.2	tfg-1	I	exon 4	14103060	14104193	1133	43	45.32	1431.45	166.983	2204.54	227.481	1.54008	0.0365775	0	yes
	Y63D3A.5.1	tfg-1	I	exon 3	14103060	14104193	1133	43	45.32	1431.45	166.983	2204.54	227.481	1.54008	0.0365775	0	yes
	W07B3.2 (f.1,f.2)	gei-4	III	exon 6	346288	346507	219	8	8.76	668.909	96.81	1030.07	119.501	1.53992	0.100987	8.96906e-08	yes
	W07B3.2d.2	gei-4	III	exon 6	346288	346507	219	8	8.76	668.909	96.81	1030.07	119.501	1.53992	0.100987	8.96906e-08	yes
	W07B3.2d.1	gei-4	III	exon 6	346288	346507	219	8	8.76	668.909	96.81	1030.07	119.501	1.53992	0.100987	8.96906e-08	yes
	W07B3.2c.2	gei-4	III	exon 6	346288	346507	219	8	8.76	668.909	96.81	1030.07	119.501	1.53992	0.100987	8.96906e-08	yes
	W07B3.2c.1	gei-4	III	exon 6	346288	346507	219	8	8.76	668.909	96.81	1030.07	119.501	1.53992	0.100987	8.96906e-08	yes
	W07B3.2 (b.1, b.2)	gei-4	III	exon 6	346288	346507	219	8	8.76	668.909	96.81	1030.07	119.501	1.53992	0.100987	8.96906e-08	yes
	W07B3.2a.2	gei-4	III	exon 5	346288	346507	219	8	8.76	668.909	96.81	1030.07	119.501	1.53992	0.100987	8.96906e-08	yes
	W07B3.2a.1	gei-4	III	exon 5	346288	346507	219	8	8.76	668.909	96.81	1030.07	119.501	1.53992	0.100987	8.96906e-08	yes
	Y105C5B.28a	gln-3	IV	confusing	16167746	16168206	460	16	18.4	443.024	60.728	681.872	84.321	1.53913	0.0710358	3.21965e-14	yes
	R06A10.2a	gsa-1	I	exon 8	1074199	1075012	813	24	32.52	658.942	99.504	1013.53	123.27	1.53811	0.0608765	0	yes
	W09G10.4b	apd-3	II	exon 8	3541096	3541262	166	6	6.64	260.074	29.932	400.018	47.347	1.53809	0.103665	2.09528e-07	yes
	W09G10.4a	apd-3	II	exon 4	3541096	3541262	166	6	6.64	260.074	29.932	400.018	47.347	1.53809	0.103665	2.09528e-07	yes
	K11C4.3b	unc-70	V	exon 6	6883601	6888476	4875	185	195	1718.1	233.672	2640.71	286.808	1.537	0.0196682	0	yes
	K11C4.3a	unc-70	V	exon 6	6883601	6888476	4875	185	195	1718.1	233.672	2640.71	286.808	1.537	0.0196682	0	yes
	C17F4.3	C17F4.3	II	exon 2	3240677	3240857	180	6	7.2	200.768	24.246	308.204	36.02	1.53513	0.105324	3.75898e-07	no
	B0350.2g.2	unc-44	IV	exon 5	5978758	5979399	641	24	25.64	1527.21	229.282	2333.32	274.218	1.52783	0.0594605	0	yes
	B0350.2g.1	unc-44	IV	exon 4	5978758	5979399	641	24	25.64	1527.21	229.282	2333.32	274.218	1.52783	0.0594605	0	yes
	B0350.2f.2	unc-44	IV	exon 5	5978758	5979399	641	24	25.64	1527.21	229.282	2333.32	274.218	1.52783	0.0594605	0	yes
	B0350.2f.1	unc-44	IV	exon 4	5978758	5979399	641	24	25.64	1527.21	229.282	2333.32	274.218	1.52783	0.0594605	0	yes
	B0350.2e.2	unc-44	IV	exon 5	5978758	5979399	641	24	25.64	1527.21	229.282	2333.32	274.218	1.52783	0.0594605	0	yes
	B0350.2e.1	unc-44	IV	exon 4	5978758	5979399	641	24	25.64	1527.21	229.282	2333.32	274.218	1.52783	0.0594605	0	yes
	B0350.2c.2	B0350.2	IV	exon 5	5978758	5979399	641	24	25.64	1527.21	229.282	2333.32	274.218	1.52783	0.0594605	0	yes
	B0350.2c.1	B0350.2	IV	exon 4	5978758	5979399	641	24	25.64	1527.21	229.282	2333.32	274.218	1.52783	0.0594605	0	yes
	B0350.2a.2	B0350.2	IV	exon 5	5978758	5979399	641	24	25.64	1527.21	229.282	2333.32	274.218	1.52783	0.0594605	0	yes
	B0350.2a.1	B0350.2	IV	exon 4	5978758	5979399	641	24	25.64	1527.21	229.282	2333.32	274.218	1.52783	0.0594605	0	no
	Y51H1A.6a	mcd-1	II	exon 4	13892338	13892642	304	11	12.16	839.762	104.641	1282.76	146.318	1.52753	0.0778044	1.20046e-11	yes
	F15D3.1a	dys-1	I	exon 34	11536148	11536443	295	11	11.8	280.646	36.266	428.677	54.016	1.52747	0.0831238	2.21652e-10	yes
	F11C3.3.2	unc-54	I	exon 9	14856045	14856374	329	11	13.16	376.899	56.282	575.59	79.896	1.52717	0.0938781	1.95986e-08	yes
	Y39B6A.47a	nhr-145	V	exon 5	19090280	19090495	215	7	8.6	276.325	28.575	421.857	46.447	1.52667	0.0871599	1.5168e-09	yes
	Y39B6A.47b	nhr-145	V	exon 4	19090280	19090495	215	7	8.6	276.325	28.575	421.857	46.447	1.52667	0.0871599	1.5168e-09	yes
	Y105C5B.28b	gln-3	IV	exon 1	16170409	16170719	310	11	12.4	496.637	60.026	757.853	109.87	1.52597	0.0868429	1.39058e-09	yes
	R03E9.1	mdl-1	X	exon 2	6742642	6742922	280	10	11.2	997.467	132.022	1521.69	176.911	1.52555	0.0849868	6.2525e-10	no
	Y95B8A.8	Y95B8A.8	I	exon 12	870196	870326	130	4	5.2	829.111	80.122	1264.83	112.056	1.52553	0.0999988	1.47739e-07	no
	K10G9.2	K10G9.2	III	exon 2	10286364	10286752	388	13	15.52	370.615	40.311	565.282	58.391	1.52525	0.0634549	2.22045e-16	no
	H19M22.2b	let-805	III	exon 27	2680643	2681101	458	16	18.32	686.427	104.68	1046.39	136.432	1.5244	0.0764636	6.97531e-12	yes
	H19M22.2a	let-805	III	exon 25	2680643	2681101	458	16	18.32	686.427	104.68	1046.39	136.432	1.5244	0.0764636	6.97531e-12	yes
	Y39G8C.1	Y39G8C.1	II	exon 6	14077473	14078378	905	34	36.2	1011.96	121.882	1542.24	167.048	1.52401	0.0423365	0	no
	C37C3.6c.2	mig-6	V	exon 8	7829745	7831329	1584	60	63.36	3004.21	356.829	4577.79	492.668	1.52379	0.0315306	0	yes
	C37C3.6c.1	mig-6	V	exon 8	7829745	7831329	1584	60	63.36	3004.21	356.829	4577.79	492.668	1.52379	0.0315306	0	yes
	C37C3.6b.2	mig-6	V	exon 8	7829745	7831329	1584	60	63.36	3004.21	356.829	4577.79	492.668	1.52379	0.0315306	0	yes
	C37C3.6b.1	mig-6	V	exon 8	7829745	7831329	1584	60	63.36	3004.21	356.829	4577.79	492.668	1.52379	0.0315306	0	yes
	C37C3.6a.2	mig-6	V	exon 8	7829745	7831329	1584	60	63.36	3004.21	356.829	4577.79	492.668	1.52379	0.0315306	0	yes
	C37C3.6a.1	mig-6	V	exon 8	7829745	7831329	1584	60	63.36	3004.21	356.829	4577.79	492.668	1.52379	0.0315306	0	yes
	W01F3.3 (a-h)	mlt-11	V	exon 11	20669821	20670105	284	10	11.36	1557.03	201.411	2372.35	249.897	1.52364	0.080377	7.27742e-11	yes
	Y37H9A.3	Y37H9A.3	I	exon 3	13783304	13783503	199	7	7.96	485.563	50.312	739.738	83.473	1.52346	0.0882133	2.95508e-09	no
	F13B9.1c	F13B9.1	X	exon 14	8292407	8293077	670	24	26.8	1422.55	165.603	2166.59	242.02	1.52304	0.0501583	0	yes
	F13B9.1b	F13B9.1	X	exon 14	8292407	8293080	673	24	26.92	1422.55	165.603	2166.59	242.02	1.52304	0.0501583	0	yes
	F13B9.1a	F13B9.1	X	exon 15	8292407	8293080	673	24	26.92	1422.55	165.603	2166.59	242.02	1.52304	0.0501583	0	yes
	F21C10.7	F21C10.7	V	exon 10	9114492	9114927	435	16	17.4	302.632	42.741	460.729	54.574	1.52241	0.0701557	9.59233e-14	no
	C25A11.4e	ajm-1	X	exon 2	9105312	9106231	919	35	36.76	2168.68	273.432	3301.32	384.865	1.52227	0.044185	0	yes
	C25A11.4d	ajm-1	X	exon 6	9105312	9106231	919	35	36.76	2168.68	273.432	3301.32	384.865	1.52227	0.044185	0	yes
	C25A11.4c	ajm-1	X	exon 6	9105312	9106231	919	35	36.76	2168.68	273.432	3301.32	384.865	1.52227	0.044185	0	yes
	C25A11.4b	ajm-1	X	exon 6	9105312	9106231	919	35	36.76	2168.68	273.432	3301.32	384.865	1.52227	0.044185	0	yes
	C25A11.4a	ajm-1	X	exon 6	9105312	9106231	919	35	36.76	2168.68	273.432	3301.32	384.865	1.52227	0.044185	0	yes
	F21C10.7	F21C10.7	V	exon 21	9119357	9119578	221	8	8.84	326.59	53.203	496.702	55.605	1.52087	0.106285	9.54831e-07	no
	Y37H9A.3	Y37H9A.3	I	exon 2	13782048	13782431	383	12	15.32	448.347	46.101	681.657	67.367	1.52038	0.0625944	0	no
	T05A10.1j	sma-9	X	exon 8	10776497	10776715	218	8	8.72	754.41	97.174	1146.81	131.448	1.52014	0.0926682	1.9898e-08	yes
	T05A10.1i	sma-9	X	exon 8	10776497	10776715	218	8	8.72	754.41	97.174	1146.81	131.448	1.52014	0.0926682	1.9898e-08	yes
	T05A10.1g	sma-9	X	exon 8	10776497	10776715	218	8	8.72	754.41	97.174	1146.81	131.448	1.52014	0.0926682	1.9898e-08	yes
	T05A10.1f	sma-9	X	exon 8	10776497	10776715	218	8	8.72	754.41	97.174	1146.81	131.448	1.52014	0.0926682	1.9898e-08	yes
	T05A10.1e	sma-9	X	exon 8	10776497	10776715	218	8	8.72	754.41	97.174	1146.81	131.448	1.52014	0.0926682	1.9898e-08	yes
	T05A10.1d	sma-9	X	exon 8	10776497	10776715	218	8	8.72	754.41	97.174	1146.81	131.448	1.52014	0.0926682	1.9898e-08	yes
	T05A10.1c	sma-9	X	exon 5	10776497	10776715	218	8	8.72	754.41	97.174	1146.81	131.448	1.52014	0.0926682	1.9898e-08	yes
	T05A10.1a	sma-9	X	exon 6	10776497	10776715	218	8	8.72	754.41	97.174	1146.81	131.448	1.52014	0.0926682	1.9898e-08	yes
	ZC8.4d	lfi-1	X	exon 16	4991518	4991756	238	8	9.52	399.59	54.526	607.264	74.435	1.51972	0.098554	1.33898e-07	yes
	ZC8.4a	lfi-1	X	exon 17	4991518	4991756	238	8	9.52	399.59	54.526	607.264	74.435	1.51972	0.098554	1.33898e-07	yes
	F40E10.1	hch-1	X	exon 7	14696652	14697121	469	17	18.76	669.88	82.2	1018.02	118.895	1.5197	0.062439	0	no
	Y108G3AL.7	arid-1	V	exon 7	192515	193574	1059	37	42.36	1092.86	129.628	1660.32	185.312	1.51924	0.0406784	0	no
	F55A12.9d.1	pqn-44	I	exon 6	5372858	5373525	667	23	26.68	189.43	26.62	287.778	47.059	1.51918	0.0682994	2.93099e-14	yes
	F55A12.9d.2	pqn-44	I	exon 8	5372858	5373525	667	23	26.68	189.43	26.62	287.778	47.059	1.51918	0.0682994	2.93099e-14	yes
	F26H11.2c	nurf-1	II	exon 4	14392477	14392739	262	9	10.48	859.395	92.894	1305.51	128.509	1.5191	0.0740294	2.3479e-12	yes
	F26H11.2b	nurf-1	II	exon 4	14392477	14392739	262	9	10.48	859.395	92.894	1305.51	128.509	1.5191	0.0740294	2.3479e-12	yes
	F26H11.2a	nurf-1	II	exon 4	14392477	14392739	262	9	10.48	859.395	92.894	1305.51	128.509	1.5191	0.0740294	2.3479e-12	yes
	T22D1.1	T22D1.1	IV	exon 5	6924331	6924695	364	13	14.56	135.393	18.91	205.671	25.033	1.51907	0.0780525	2.92644e-11	no
	F13B9.1c	F13B9.1	X	exon 6	8288790	8288968	178	6	7.12	1844.77	186.264	2802.19	275.355	1.51899	0.0873708	2.84797e-09	yes
	F13B9.1b	F13B9.1	X	exon 6	8288790	8288968	178	6	7.12	1844.77	186.264	2802.19	275.355	1.51899	0.0873708	2.84797e-09	yes
	F13B9.1a	F13B9.1	X	exon 6	8288790	8288968	178	6	7.12	1844.77	186.264	2802.19	275.355	1.51899	0.0873708	2.84797e-09	yes
	Y71G12B.11 (a,b)	tln-1	I	exon 2	1721911	1722460	549	19	21.96	1674.32	206.058	2542.6	286.649	1.51858	0.0581463	0	yes
	R107.5b	R107.5	III	exon 3	9052086	9052286	200	7	8	255.222	29.641	387.532	43.6	1.51841	0.0927987	2.31813e-08	no
	K08F8.6	let-19	II	exon 15	8777393	8777656	263	9	10.52	917.512	115.339	1392.8	149.606	1.51802	0.0836678	5.96284e-10	no
	C25A11.4e	ajm-1	X	exon 4	9106531	9107181	650	24	26	1677.12	215.591	2544.22	279.463	1.51701	0.052359	0	yes
	C25A11.4d	ajm-1	X	exon 8	9106531	9107181	650	24	26	1677.12	215.591	2544.22	279.463	1.51701	0.052359	0	yes
	C25A11.4c	ajm-1	X	exon 8	9106531	9107181	650	24	26	1677.12	215.591	2544.22	279.463	1.51701	0.052359	0	yes
	C25A11.4b	ajm-1	X	exon 8	9106531	9107181	650	24	26	1677.12	215.591	2544.22	279.463	1.51701	0.052359	0	yes
	C25A11.4a	ajm-1	X	exon 8	9106531	9107181	650	24	26	1677.12	215.591	2544.22	279.463	1.51701	0.052359	0	yes
	Y39G8C.1	Y39G8C.1	II	exon 9	14082588	14083433	845	31	33.8	771.907	106.659	1170.8	128.605	1.51676	0.0480864	0	no
	B0350.2f.2	unc-44	IV	exon 17	5988272	6003246	14974	525	598.96	651.77	103.774	988.029	115.153	1.51592	0.0130545	0	yes
	B0350.2f.1	unc-44	IV	exon 16	5988272	6003246	14974	525	598.96	651.77	103.774	988.029	115.153	1.51592	0.0130545	0	yes
	F40E10.1	hch-1	X	exon 5	14698178	14698480	302	11	12.08	317.061	38.441	480.495	54.361	1.51547	0.0757721	1.02578e-11	no
	Y73B3A.1	Y73B3A.1	X	exon 5	44235	44707	472	9	18.88	442.407	47.223	670.321	74.981	1.51517	0.0780895	4.19134e-11	no
	T13H2.5b	spat-3	X	exon 6	4596693	4597935	1242	46	49.68	455.834	56.161	690.644	84.127	1.51512	0.0387037	0	yes
	T13H2.5a	spat-3	X	exon 16	4596693	4597935	1242	46	49.68	455.834	56.161	690.644	84.127	1.51512	0.0387037	0	yes
	F47A4.2	dpy-22	X	exon 16	9812325	9813629	1304	50	52.16	405.418	56.322	614.245	74.831	1.51509	0.0395907	0	no
	K10G9.1	vglu-2	III	exon 5	10296436	10296801	365	12	14.6	423.241	53.948	641.125	70.772	1.5148	0.0737346	2.91456e-12	no
	K10B3.10a	spc-1	X	exon 9	3118860	3119436	576	22	23.04	498.697	66.413	755.04	97.715	1.51403	0.0599418	0	yes
	K10B3.10b	spc-1	X	exon 10	3118860	3119436	576	22	23.04	498.697	66.413	755.04	97.715	1.51403	0.0599418	0	yes
	F25E5.8b.2	F25E5.8	V	exon 1	7435222	7436755	1533	55	61.32	188.629	25.881	285.342	47.146	1.51272	0.0438071	0	yes
	F52B10.1	nmy-1	X	exon 1	2909547	2909677	130	4	5.2	1301.68	119.672	1968.61	196.837	1.51236	0.102712	6.09072e-07	no
	F14E5.5	lips-10	II	exon 3	8441245	8441534	289	10	11.56	387.811	51.014	586.283	79.268	1.51178	0.0901808	1.38695e-08	no
	ZC123.3a	zfh-2	I	exon 12	828027	828727	700	25	28	462.176	58.638	698.553	87.537	1.51144	0.0539058	0	yes
	ZC123.3b	zfh-2	I	exon 7	828027	828727	700	25	28	462.176	58.638	698.553	87.537	1.51144	0.0539058	0	yes
	ZC123.3c	zfh-2	I	exon 6	828027	828727	700	25	28	462.176	58.638	698.553	87.537	1.51144	0.0539058	0	yes
	ZC123.3d	zfh-2	I	exon 4	828027	828727	700	25	28	462.176	58.638	698.553	87.537	1.51144	0.0539058	0	yes
	ZC123.3e	zfh-2	I	exon 2	828027	828727	700	25	28	462.176	58.638	698.553	87.537	1.51144	0.0539058	0	yes
	Y57A10A.18 (a-e)	pqn-87	II	exon 7	12217159	12217628	469	17	18.76	556.258	75.454	840.735	104.955	1.51141	0.0675766	3.79696e-14	yes
	T23E7.2 (a,c,e,f)	T23E7.2	X	exon 7	17675275	17675532	257	8	10.28	419.021	52.318	632.729	62.857	1.51002	0.0851829	2.13329e-09	yes
	T23E7.2b	T23E7.2	X	exon 6	17675275	17675532	257	8	10.28	419.021	52.318	632.729	62.857	1.51002	0.0851829	2.13329e-09	yes
	Y105E8A.22	exc-4	I	exon 3	14514943	14515170	227	8	9.08	357.743	44.276	540.181	56.882	1.50997	0.0867513	4.13946e-09	no
	W03F11.6d	afd-1	I	exon 15	2200011	2200150	139	5	5.56	1410.99	145.36	2130.5	191.886	1.50993	0.0924026	3.41692e-08	yes
	W03F11.6c	afd-1	I	exon 15	2200011	2200150	139	5	5.56	1410.99	145.36	2130.5	191.886	1.50993	0.0924026	3.41692e-08	yes
	W03F11.6b	afd-1	I	exon 2	2200011	2200150	139	5	5.56	1410.99	145.36	2130.5	191.886	1.50993	0.0924026	3.41692e-08	yes
	W03F11.6a	afd-1	I	exon 15	2200011	2200150	139	5	5.56	1410.99	145.36	2130.5	191.886	1.50993	0.0924026	3.41692e-08	yes
	K08E7.5c	K08E7.5	IV	exon 4	12576027	12576513	486	18	19.44	215.926	26.434	325.852	35.367	1.50909	0.0581945	0	yes
	K08E7.5a	K08E7.5	IV	exon 5	12576027	12576513	486	18	19.44	215.926	26.434	325.852	35.367	1.50909	0.0581945	0	yes
	Y39G10AR.18b	dot-1.1	I	exon 5	2388158	2388779	621	23	24.84	342.495	40.46	516.616	65.244	1.50839	0.0543902	0	yes
	Y39G10AR.18a	dot-1.1	I	exon 13	2388158	2388779	621	23	24.84	342.495	40.46	516.616	65.244	1.50839	0.0543902	0	yes
	F58A4.11	gei-13	III	exon 3	9635535	9635780	245	8	9.8	297.951	39.906	449.063	55.18	1.50717	0.0968548	1.63739e-07	no
	F08A8.1c.2	acox-1	I	exon 2	12938719	12938909	190	7	7.6	432.762	54.207	652.222	80.102	1.50711	0.0999267	3.87766e-07	yes
	F08A8.1c.1	acox-1	I	exon 2	12938719	12938909	190	7	7.6	432.762	54.207	652.222	80.102	1.50711	0.0999267	3.87766e-07	yes
	F08A8.1b.1	acox-1	I	exon 2	12938719	12938909	190	7	7.6	432.762	54.207	652.222	80.102	1.50711	0.0999267	3.87766e-07	yes
	F08A8.1b.1	acox-1	I	exon 2	12938718	12938909	191	7	7.64	432.762	54.207	652.222	80.102	1.50711	0.0999267	3.87766e-07	yes
	F08A8.1a.2	acox-1	I	exon 2	12938719	12938909	190	7	7.6	432.762	54.207	652.222	80.102	1.50711	0.0999267	3.87766e-07	yes
	F08A8.1a.1	acox-1	I	exon 2	12938719	12938909	190	7	7.6	432.762	54.207	652.222	80.102	1.50711	0.0999267	3.87766e-07	yes
	Y48G9A.4	frl-1	III	exon 7	2141352	2141772	420	14	16.8	670.464	89.126	1010.12	118.428	1.50659	0.0713692	1.2641e-12	no
	C25A11.4e	ajm-1	X	exon 3	9106299	9106481	182	6	7.28	2457.53	286.333	3701.18	405.281	1.50606	0.0983092	2.63789e-07	yes
	C25A11.4d	ajm-1	X	exon 7	9106299	9106481	182	6	7.28	2457.53	286.333	3701.18	405.281	1.50606	0.0983092	2.63789e-07	yes
	C25A11.4c	ajm-1	X	exon 7	9106299	9106481	182	6	7.28	2457.53	286.333	3701.18	405.281	1.50606	0.0983092	2.63789e-07	yes
	C25A11.4b	ajm-1	X	exon 7	9106299	9106481	182	6	7.28	2457.53	286.333	3701.18	405.281	1.50606	0.0983092	2.63789e-07	yes
	C25A11.4a	ajm-1	X	exon 7	9106299	9106481	182	6	7.28	2457.53	286.333	3701.18	405.281	1.50606	0.0983092	2.63789e-07	yes
	F52G3.1	F52G3.1	X	exon 8	16968417	16968808	391	13	15.64	862.919	108.705	1299.47	160.534	1.5059	0.073692	6.64846e-12	no
	F28F8.2	acs-2	V	exon 4	15568552	15568927	375	13	15	243.889	28.921	367.269	43.788	1.50589	0.0702319	5.8864e-13	no
	W01F3.3 (a-h)	mlt-11	V	exon 14	20672180	20672794	614	22	24.56	1891.9	232.047	2847.13	309.943	1.5049	0.0526173	0	yes
	W10C8.2	pop-1	I	exon 3	2824878	2825430	552	20	22.08	529.2	66.935	796.314	84.982	1.50475	0.0556829	0	no
	F47C12.2	clec-78	IV	exon 15	4002783	4003161	378	13	15.12	571.667	75.032	859.898	107.669	1.50419	0.0756766	2.69242e-11	no
	Y51A2D.15 (a-c)	grdn-1	V	exon 15	18609277	18609583	306	11	12.24	468.909	63.642	705.066	79.248	1.50363	0.0798923	2.90304e-10	yes
	Y51A2D.15c	grdn-1	V	exon 13	18609277	18609583	306	11	12.24	468.909	63.642	705.066	79.248	1.50363	0.0798923	2.90304e-10	yes
	Y59A8B.23(a,c)	gck-3	V	exon 5	17958064	17958342	278	9	11.12	230.395	31.6	346.352	37.42	1.5033	0.0874908	8.78995e-09	yes
	Y59A8B.23b	gck-3	V	exon 3	17958064	17958342	278	9	11.12	230.395	31.6	346.352	37.42	1.5033	0.0874908	8.78995e-09	yes
	F07G11.8	srx-6	V	exon 4	7311852	7312058	206	7	8.24	130.746	17.306	196.492	23.666	1.50285	0.101653	7.54685e-07	no
	H19M22.2b	let-805	III	exon 14	2665492	2665785	293	10	11.72	828.333	126.61	1244.67	152.673	1.50263	0.0931247	6.76381e-08	yes
	H19M22.2a	let-805	III	exon 14	2665492	2665785	293	10	11.72	828.333	126.61	1244.67	152.673	1.50263	0.0931247	6.76381e-08	yes
	D2045.1b	atx-2	III	exon 5	10466180	10466467	287	10	11.48	920.85	110.936	1383.17	153.826	1.50205	0.0778778	1.14322e-10	yes
	D2045.1a	atx-2	III	exon 10	10466180	10466467	287	10	11.48	920.85	110.936	1383.17	153.826	1.50205	0.0778778	1.14322e-10	yes
	F15D3.1a	dys-1	I	exon 20	11544823	11545095	272	9	10.88	242.222	36.572	363.802	46.206	1.50194	0.098778	3.74549e-07	yes
	F52B10.1	nmy-1	X	exon 15	2915267	2915956	689	25	27.56	1169.8	151.385	1756.79	191.591	1.50179	0.0508311	0	no
	T13F2.3b	pis-1	IV	exon 9	9794064	9794306	242	8	9.68	219.688	30.418	329.736	41.308	1.50093	0.0990858	4.29256e-07	no
	T13F2.3a	pis-1	IV	exon 9	9794064	9794306	242	8	9.68	219.688	30.418	329.736	41.308	1.50093	0.0990858	4.29256e-07	no

## Sheet: Transcripts
Transcript	Locus	Exons	Up >10%	Down >10%	Probes	Avg ratio	Avg Z-score	P-value	AS
Transcripts downregulated in mec-8
W05H9.1b	W05H9.1	7	0	7	41	0.379246	-23.7505	2	yes
W05H9.1a	W05H9.1	7	0	7	44	0.384009	-23.5497	2	yes
T11F8.3a.2	rme-2	7	0	7	105	0.496423	-21.7722	2	yes
H02I12.1	cbd-1	10	0	10	152	0.502167	-22.5968	2	no
T11F8.3a.1	rme-2	7	0	7	107	0.511736	-21.3151	2	yes
T25G3.2.2	chs-1	10	0	10	144	0.545789	-16.9587	2	yes
T25G3.2.1	chs-1	10	0	10	154	0.555133	-17.0745	2	yes
F46A9.6b	mec-8	4	0	4	53	0.567599	-16.4244	2	yes
F46A9.6a	mec-8	3	0	3	33	0.569705	-15.8198	2	yes
F42A9.6c	mec-8	4	0	4	11	0.592795	-5.78636	2	yes
C07G2.1a	cpg-1	4	0	4	66	0.593538	-16.4348	2	yes
C07G2.1b	cpg-1	3	0	3	20	0.609945	-9.80045	2	yes
F48F7.8	arrd-27	2	0	2	5	0.621137	-3.72267	1.9998	no
T22D1.5	T22D1.5	6	0	6	43	0.623577	-9.0659	2	no
K01C8.3a	tdc-1	8	0	8	73	0.624504	-9.67766	2	yes
C02B8.2	fbxc-38	2	0	2	9	0.633203	-4.814	2	no
T21E3.1	egg-4	5	0	5	19	0.641041	-6.33857	2	no
D1081.7a	D1081.7	10	0	10	102	0.643721	-9.77627	2	yes
D1081.7b	D1081.7	10	0	10	101	0.644325	-9.71721	2	yes
F58E6.13	F58E6.13	4	0	4	34	0.645677	-8.92364	2	yes
C32E8.5	C32E8.5	4	0	4	34	0.646508	-9.4885	2	no
B0513.3	rpl-29	2	0	1	8	0.652007	-5.61258	2	yes
F31C3.5	psf-2	2	0	2	19	0.656109	-10.0742	2	no
T27E9.2	T27E9.2	1	0	1	12	0.65662	-4.32417	1.99998	no
K01C8.3b	tdc-1	10	0	10	75	0.657232	-7.92692	2	yes
MTCE.4	MTCE.4	2	0	2	8	0.658026	-4.02753	1.99994	no
Y51H7C.5	Y51H7C.5	7	0	1	13	0.665776	-5.73267	2	no
Transcripts upregulated in mec-8
Y46H3A.2	hsp-16.41	2	2	0	18	4.95795	10.339	0	no
T15D6.8	T15D6.8	5	5	0	29	2.38405	6.92168	4.4631e-12	no
K12G11.3	sodh-1	3	3	0	44	2.22567	12.6116	0	no
F36A2.13	F36A2.13	29	29	0	316	2.10804	8.56712	0	no
F26H11.2g	nurf-1	5	5	0	44	2.06043	8.19713	2.22045e-16	yes
F26H11.2f	nurf-1	6	6	0	60	1.99759	8.10361	4.44089e-16	yes
F25E5.8b.2	F25E5.8	1	1	0	19	1.96154	11.5846	0	yes
C15C7.4	C15C7.4	2	2	0	17	1.94216	5.03251	4.84099e-07	no
F25E5.8b	F25E5.8	1	1	0	20	1.93625	11.5575	0	yes
F13G11.1b.1	dmd-6	6	6	0	54	1.90415	7.77036	7.77156e-15	yes
F13G11.1b.2	dmd-6	5	5	0	55	1.87616	8.16765	2.22045e-16	yes
M05D6.4	lact-4	5	5	0	44	1.87233	5.9765	2.27978e-09	no
C05E4.9b	icl-1	4	4	0	115	1.86955	11.484	0	yes
M02D8.4c	asns-2	6	6	0	55	1.86697	6.26815	3.65356e-10	yes
M02D8.4a	asns-2	7	7	0	62	1.86113	6.26724	3.67502e-10	yes
R01E6.3b	cah-4	6	6	0	31	1.85888	5.60808	2.04582e-08	yes
F26H11.2e	nurf-1	6	6	0	44	1.83176	6.26311	3.77363e-10	yes
C05E4.9a	icl-1	5	5	0	112	1.79439	10.0574	0	yes
M02D8.4b	asns-2	7	7	0	65	1.78193	6.60683	3.92637e-11	yes
R01E6.3a	cah-4	6	6	0	29	1.76443	5.2415	1.59275e-07	yes
H01A20.1	nhr-3	7	7	0	58	1.7548	6.59325	4.30291e-11	no
W03F11.6b	afd-1	6	6	0	73	1.72796	9.03996	0	yes
Y46H3A.3	hsp-16.2	2	2	0	19	1.72175	5.4302	5.62914e-08	yes
F14E5.5	lips-10	4	4	0	34	1.71732	5.96279	2.47961e-09	no
C23F12.1a	fln-2	27	26	1	240	1.70936	6.30811	2.82457e-10	yes
T27C4.4c	lin-40	3	3	0	78	1.69973	10.2949	0	yes
Y43F8B.2b	Y43F8B.2	4	4	0	30	1.69561	5.45608	4.86772e-08	yes
T27C4.4d	lin-40	6	6	0	87	1.67704	7.30512	2.77112e-13	yes
Y63D3A.5.2	tfg-1	3	3	0	54	1.668	9.24807	0	no
F26H11.2d	nurf-1	9	9	0	71	1.66796	5.72821	1.01498e-08	yes
C23F12.1b	fln-2	30	29	1	305	1.66605	6.24735	4.17483e-10	yes
T27C4.4b	lin-40	7	7	0	97	1.64489	7.02207	2.18603e-12	yes
K08C7.5	fmo-2	5	5	0	61	1.64378	7.01946	2.22711e-12	no
T04D1.4	chd-7	9	9	0	339	1.63012	11.6919	0	no
T27C4.4a	lin-40	8	8	0	102	1.62849	6.82429	8.83582e-12	yes
F18E3.11	F18E3.11	1	1	0	14	1.62823	5.28839	1.23395e-07	no
Y71G12B.11a	tln-1	10	10	0	283	1.62081	10.2522	0	yes
H14N18.1b.1	unc-23	4	4	0	46	1.62009	6.45864	1.05649e-10	yes
H14N18.1b.2	unc-23	4	4	0	46	1.62009	6.45864	1.05649e-10	yes
H14N18.1c	unc-23	4	4	0	46	1.62009	6.45864	1.05649e-10	yes
F55A12.9d.2	pqn-44	7	6	0	66	1.61047	4.98591	6.16699e-07	yes
F52G3.1	F52G3.1	15	15	0	134	1.60567	5.51497	3.48837e-08	no
F25E5.8a.1	F25E5.8	2	2	0	27	1.60486	7.11455	1.12266e-12	yes
F25E5.8a.2	F25E5.8	2	2	0	25	1.59946	6.91253	4.76108e-12	yes
T15D6.7	glct-3	4	3	0	33	1.59561	5.05961	4.20126e-07	no
R11F4.1.2	R11F4.1	5	5	0	57	1.59297	6.26928	3.62713e-10	no
T07A5.6a	T07A5.6	3	3	0	22	1.59238	6.00927	1.86359e-09	yes
F38H12.3	nhr-181	6	6	0	39	1.58118	5.24405	1.57094e-07	no
R11F4.1.1	R11F4.1	5	5	0	72	1.57964	6.94232	3.85714e-12	no
Y65B4BL.1	Y65B4BL.1	6	5	0	44	1.57011	4.91362	8.94097e-07	yes
Y105C5B.28b	gln-3	4	4	0	46	1.5701	6.35411	2.09637e-10	yes
Y51H4A.12	set-26	7	7	0	60	1.54611	5.36553	8.07113e-08	no
F28F8.2	acs-2	6	5	0	67	1.54372	6.57117	4.99214e-11	no
F32B4.4b.2	F32B4.4	6	6	0	78	1.54158	7.91669	2.44249e-15	yes
C25A11.4e	ajm-1	9	9	0	109	1.53863	5.48969	4.02646e-08	yes
F21C10.7	F21C10.7	25	23	1	274	1.53777	5.12348	2.99947e-07	no
D2045.1b	atx-2	7	7	0	63	1.5373	6.36811	1.91373e-10	yes
F32B4.4a	F32B4.4	6	6	0	83	1.53488	7.95514	1.77636e-15	yes
W09B6.1a.2	pod-2	9	8	0	235	1.53109	8.07632	6.66134e-16	yes
Y105C5B.28a	gln-3	5	5	0	49	1.53099	5.61488	1.96698e-08	yes
W01F3.3	mlt-11	15	15	0	239	1.52785	7.25295	4.07674e-13	yes
Y71G12B.11b	tln-1	7	7	0	110	1.52278	7.79446	6.43929e-15	yes
F28F9.1	zag-1	7	7	0	76	1.51797	6.22846	4.71055e-10	no
Y113G7B.23	swsn-1	6	6	0	100	1.51598	7.41254	1.23901e-13	yes
C25A11.4c	ajm-1	13	13	0	132	1.51459	5.59327	2.22833e-08	yes
F25E5.8b.1	F25E5.8	1	1	0	55	1.51271	11.7039	0	yes

## Sheet: Gene List
All genes	Up introns	Up exons	Down exons	Both introns and exons up
aat-2	ajm-1	aat-2	abt-3	ajm-1
abt-3	bed-2	acox-1	acp-4	lact-4
acox-1	fbn-1	acs-2	acr-7	let-805
acp-4	lact-4	afd-1	add-1	mlt-11
acr-7	let-805	ajm-1	aexr-2	nurf-1
acs-2	M05D6.3	apd-3	AH9.6	pod-2
add-1	mlt-11	apm-1	arrd-27	unc-69
aexr-2	nurf-1	arid-1	B0238.1	ZK180.5
afd-1	pod-2	asic-2	B0478.3
AH9.6	puf-9	asns-2	B0507.5
ajm-1	unc-69	atx-2	bus-19
apd-3	ZK180.5	B0350.2	C01G12.7
apm-1		C08B6.4	C03B1.2
arid-1		C17F4.3	C03C10.2
arrd-27		C18C4.5	C03C11.2
asic-2		C23F12.1	C04B4.2
asns-2		C50E10.4	C09G1.5
atx-2		cah-4	C14B1.2
B0238.1		chd-7	C14C11.2
B0350.2		clec-78	C14C6.3
B0478.3		D2063.1	C17G10.7
B0507.5		dmd-6	C18H2.5
bed-2		dot-1.1	C25A1.1
bus-19		dpy-22	C27D9.1
C01G12.7		dys-1	C31B8.9
C03B1.2		eps-8	C31H2.4
C03C10.2		exc-4	C31H5.5
C03C11.2		F09C8.2	C32E8.5
C04B4.2		F13B9.1	C39B10.1
C08B6.4		F18E3.11	C41D11.5
C09G1.5		F21C10.7	C46C11.2
C14B1.2		F25E5.8	C46E10.1
C14C11.2		F32B4.4	C52B11.5
C14C6.3		F35C11.2	C55B7.11
C17F4.3		F36A2.13	cbd-1
C17G10.7		F49E12.12	ceh-12
C18C4.5		F52G3.1	che-3
C18H2.5		F53B3.5	chhy-1
C23F12.1		F59A2.2	chs-1
C25A1.1		F59A2.6	clec-113
C27D9.1		fasn-1	clec-115
C31B8.9		fln-2	clec-154
C31H2.4		fmo-2	clec-169
C31H5.5		frl-1	clec-222
C32E8.5		gck-3	clec-31
C39B10.1		gei-13	clec-51
C41D11.5		gei-4	clec-67
C46C11.2		glct-3	cpg-1
C46E10.1		gln-3	cpg-2
C50E10.4		grdn-1	cpg-3
C52B11.5		gsa-1	cpg-4
C55B7.11		gsnl-1	csk-1
cah-4		H08J11.2	cyn-5
cbd-1		H11E01.3	cyp-13A1
ceh-12		hch-1	cyp-31A3
chd-7		hlb-1	cyp-33E1
che-3		hsp-110	D1081.7
chhy-1		hsp-16.2	D2030.8
chs-1		hsp-16.41	D2089.3
clec-113		icl-1	D2092.10
clec-115		ifa-3	daf-10
clec-154		K01B6.3	dct-17
clec-169		K08E7.5	del-4
clec-222		K10G9.2	des-2
clec-31		klp-20	dhc-3
clec-51		lact-4	dmsr-1
clec-67		let-19	dmsr-13
clec-78		let-2	dmsr-14
cpg-1		let-526	dmsr-9
cpg-2		let-805	dpy-20
cpg-3		lfi-1	drh-2
cpg-4		lin-40	E03H12.5
csk-1		lips-10	ech-8
cyn-5		mam-1	egg-1
cyp-13A1		mcd-1	egg-4
cyp-31A3		mdl-1	egl-15
cyp-33E1		mig-6	egl-6
D1081.7		mlt-11	ent-3
D2030.8		mxl-3	F14B8.6
D2063.1		nhr-127	F14D2.7
D2089.3		nhr-145	F15A8.4
D2092.10		nhr-152	F16F9.4
daf-10		nhr-181	F22B3.7
dct-17		nhr-201	F26D11.4
del-4		nhr-203	F27C1.11
des-2		nhr-3	F30B5.4
dhc-3		nhr-62	F32D8.2
dmd-6		nmy-1	F32G8.2
dmsr-1		nnt-1	F35C11.4
dmsr-13		nurf-1	F35C11.5
dmsr-14		oac-39	F35G2.5
dmsr-9		oac-44	F36D1.9
dot-1.1		pis-1	F38E11.6
dpy-20		plx-1	F41E7.6
dpy-22		pod-2	F42A10.8
drh-2		pop-1	F42A10.9
dys-1		pqn-15	F42A9.6
E03H12.5		pqn-44	F42C5.3
ech-8		pqn-80	F44G4.3
egg-1		pqn-85	F45D3.1
egg-4		pqn-87	F48E8.4
egl-15		pxd-1	F49E12.1
egl-6		R07E3.6	F52H3.6
ent-3		R107.5	F53B2.8
eps-8		R10F2.1	F53B7.4
exc-4		R11F4.1	F54D12.9
F09C8.2		sam-10	F54F7.6
F13B9.1		sea-2	F55E10.6
F14B8.6		set-16	F57B10.4
F14D2.7		set-26	F58E6.13
F15A8.4		set-9	F59A3.2
F16F9.4		sma-9	F59E12.8
F18E3.11		snrp-200	F59F5.3
F21C10.7		sodh-1	fbxa-202
F22B3.7		spat-3	fbxa-4
F25E5.8		spc-1	fbxa-61
F26D11.4		srx-6	fut-5
F27C1.11		srz-78	gcp-2.2
F30B5.4		ssl-1	gcy-23
F32B4.4		swsn-1	gcy-28
F32D8.2		swsn-3	gcy-6
F32G8.2		T07C4.10	gcy-9
F35C11.2		T15D6.8	ggr-2
F35C11.4		T22D1.1	gld-1
F35C11.5		T23E7.2	glh-2
F35G2.5		tag-241	gly-13
F36A2.13		tag-257	gly-5
F36D1.9		tbc-17	gpa-3
F38E11.6		tfg-1	gpx-3
F41E7.6		tln-1	gtl-2
F42A10.8		unc-23	H22K11.3
F42A10.9		unc-33	H24G06.1
F42A9.6		unc-44	H31G24.1
F42C5.3		unc-52	H39E23.2
F44G4.3		unc-54	H43E16.1
F45D3.1		unc-69	haf-9
F48E8.4		unc-70	hst-3.1
F49E12.1		unc-75	htp-1
F49E12.12		unc-89	ima-2
F52G3.1		vab-10	ins-18
F52H3.6		vglu-2	inx-21
F53B2.8		W06H8.6	irld-29
F53B3.5		W09G3.6	K06B9.2
F53B7.4		wrt-6	K07A12.4
F54D12.9		Y37A1B.5	K07E8.7
F54F7.6		Y37H9A.3	K07H8.8
F55E10.6		Y39G8C.1	K09E4.2
F57B10.4		Y43F8B.2	kel-10
F58E6.13		Y48C3A.12	kin-15
F59A2.2		Y50D7A.8	lgc-48
F59A2.6		Y51F10.3	lgx-1
F59A3.2		Y55B1BL.1	lite-1
F59E12.8		Y65B4BL.1	lsl-1
F59F5.3		Y73B3A.1	lst-6
fasn-1		Y95B8A.8	M01H9.5
fbn-1		zag-1	mccc-1
fbxa-202		zfh-2	mcu-1
fbxa-4		ZK180.5	mec-8
fbxa-61		zyx-1	mocs-1
fln-2			mrp-6
fmo-2			nas-33
frl-1			ncx-10
fut-5			nhr-13
gck-3			nhr-137
gcp-2.2			nhr-195
gcy-23			nhr-77
gcy-28			nmur-1
gcy-6			nphp-2
gcy-9			npr-31
gei-13			oac-38
gei-4			octr-1
ggr-2			oma-2
glct-3			osm-6
gld-1			otpl-3
glh-2			perm-1
gln-3			psf-2
gly-13			R07B7.9
gly-5			R10D12.8
gpa-3			rad-54
gpx-3			rme-2
grdn-1			rpa-4
gsa-1			rrf-1
gsnl-1			sec-3
gtl-2			set-28
H08J11.2			snpc-1.3
H11E01.3			snt-2
H22K11.3			spat-1
H24G06.1			spe-41
H31G24.1			sqv-1
H39E23.2			sra-1
H43E16.1			srab-18
haf-9			srbc-41
hch-1			srd-10
hlb-1			srd-33
hsp-110			srd-50
hsp-16.2			sre-1
hsp-16.41			sre-26
hst-3.1			sre-40
htp-1			srg-64
icl-1			srh-255
ifa-3			srh-61
ima-2			sri-77
ins-18			srj-49
inx-21			srsx-15
irld-29			srt-6
K01B6.3			srt-61
K06B9.2			srt-65
K07A12.4			srv-17
K07E8.7			srv-22
K07H8.8			srv-28
K08E7.5			srw-12
K09E4.2			srw-133
K10G9.2			srw-44
kel-10			srx-41
kin-15			srx-54
klp-20			srx-90
lact-4			srxa-10
let-19			srxa-2
let-2			srz-85
let-526			str-226
let-805			stt-3
lfi-1			such-1
lgc-48			sul-1
lgx-1			swt-7
lin-40			T01D3.1
lips-10			T01H10.8
lite-1			T12F5.2
lsl-1			T12G3.6
lst-6			T13F2.4
M01H9.5			T14B4.9
M05D6.3			T14G10.8
mam-1			T15D6.12
mccc-1			T16G12.1
mcd-1			T20D4.3
mcu-1			T21B10.4
mdl-1			T22D1.5
mec-8			T23B7.3
mig-6			T24D5.1
mlt-11			T28B4.2
mocs-1			T28F4.4
mrp-6			taf-11.2
mxl-3			tag-349
nas-33			tag-97
ncx-10			tbc-16
nhr-127			tdc-1
nhr-13			twk-10
nhr-137			twk-14
nhr-145			ugt-2
nhr-152			W03B1.1
nhr-181			W03D8.11
nhr-195			W03D8.5
nhr-201			W03F8.2
nhr-203			W04G5.10
nhr-3			W05H9.1
nhr-62			W08F4.3
nhr-77			wago-4
nmur-1			wago-5
nmy-1			wht-3
nnt-1			Y17G7B.13
nphp-2			Y39B6A.40
npr-31			Y39E4B.5
nurf-1			Y40B1B.8
oac-38			Y40C7B.1
oac-39			Y45F10D.10
oac-44			Y46G5A.28
octr-1			Y48G1BL.5
oma-2			Y49E10.16
osm-6			Y50F7A.2
otpl-3			Y53G8AM.6
perm-1			Y57G11A.5
pis-1			Y59H11AR.4
plx-1			Y5H2B.1
pod-2			Y60A3A.19
pop-1			Y62E10A.14
pqn-15			Y62F5A.9
pqn-44			Y64G10A.6
pqn-80			Y65B4BL.4
pqn-85			Y71A12B.8
pqn-87			Y92H12BR.4
psf-2			Y97E10B.1
puf-9			ZC132.3
pxd-1			ZC449.1
R07B7.9			ZC477.2
R07E3.6			ZK1058.9
R107.5			ZK1290.7
R10D12.8			ZK507.3
R10F2.1
R11F4.1
rad-54
rme-2
rpa-4
rrf-1
sam-10
sea-2
sec-3
set-16
set-26
set-28
set-9
sma-9
snpc-1.3
snrp-200
snt-2
sodh-1
spat-1
spat-3
spc-1
spe-41
sqv-1
sra-1
srab-18
srbc-41
srd-10
srd-33
srd-50
sre-1
sre-26
sre-40
srg-64
srh-255
srh-61
sri-77
srj-49
srsx-15
srt-6
srt-61
srt-65
srv-17
srv-22
srv-28
srw-12
srw-133
srw-44
srx-41
srx-54
srx-6
srx-90
srxa-10
srxa-2
srz-78
srz-85
ssl-1
str-226
stt-3
such-1
sul-1
swsn-1
swsn-3
swt-7
T01D3.1
T01H10.8
T07C4.10
T12F5.2
T12G3.6
T13F2.4
T14B4.9
T14G10.8
T15D6.12
T15D6.8
T16G12.1
T20D4.3
T21B10.4
T22D1.1
T22D1.5
T23B7.3
T23E7.2
T24D5.1
T28B4.2
T28F4.4
taf-11.2
tag-241
tag-257
tag-349
tag-97
tbc-16
tbc-17
tdc-1
tfg-1
tln-1
twk-10
twk-14
ugt-2
unc-23
unc-33
unc-44
unc-52
unc-54
unc-69
unc-70
unc-75
unc-89
vab-10
vglu-2
W03B1.1
W03D8.11
W03D8.5
W03F8.2
W04G5.10
W05H9.1
W06H8.6
W08F4.3
W09G3.6
wago-4
wago-5
wht-3
wrt-6
Y17G7B.13
Y37A1B.5
Y37H9A.3
Y39B6A.40
Y39E4B.5
Y39G8C.1
Y40B1B.8
Y40C7B.1
Y43F8B.2
Y45F10D.10
Y46G5A.28
Y48C3A.12
Y48G1BL.5
Y49E10.16
Y50D7A.8
Y50F7A.2
Y51F10.3
Y53G8AM.6
Y55B1BL.1
Y57G11A.5
Y59H11AR.4
Y5H2B.1
Y60A3A.19
Y62E10A.14
Y62F5A.9
Y64G10A.6
Y65B4BL.1
Y65B4BL.4
Y71A12B.8
Y73B3A.1
Y92H12BR.4
Y95B8A.8
Y97E10B.1
zag-1
ZC132.3
ZC449.1
ZC477.2
zfh-2
ZK1058.9
ZK1290.7
ZK180.5
ZK507.3
zyx-1

## Sheet: Alt. Spliced Genes
Up introns	Alt. splice?		Up exons	Alt. splice?		Down exons	Alt. splice?
ajm-1	yes		acox-1	yes		add-1	yes
fbn-1	yes		afd-1	yes		B0507.5	yes
let-805	yes		ajm-1	yes		bus-19	yes
mlt-11	yes		apd-3	yes		C09G1.5	yes
nurf-1	yes		asns-2	yes		C14C11.2	yes
pod-2	yes		atx-2	yes		chs-1	yes
unc-69	yes		B0350.2	yes		cpg-1	yes
ZK180.5	yes		C08B6.4	yes		csk-1	yes
bed-2	no		C18C4.5	yes		dct-17	yes
lact-4	no		C50E10.4	yes		des-2	yes
M05D6.3	no		cah-4	yes		dhc-3	yes
puf-9	no		dmd-6	yes		dmsr-1	yes
			dot-1.1	yes		egl-15	yes
			dys-1	yes		egl-6	yes
			eps-8	yes		F35G2.5	yes
			F13B9.1	yes		F38E11.6	yes
			F25E5.8	yes		F42A9.6	yes
			F32B4.4	yes		F42C5.3	yes
			F59A2.2	yes		F58E6.13	yes
			fln-2	yes		gcy-23	yes
			gck-3	yes		gcy-28	yes
			gei-4	yes		ggr-2	yes
			gln-3	yes		gld-1	yes
			grdn-1	yes		gly-5	yes
			gsa-1	yes		H24G06.1	yes
			hlb-1	yes		inx-21	yes
			hsp-110	yes		K07A12.4	yes
			hsp-16.2	yes		K09E4.2	yes
			icl-1	yes		kin-15	yes
			K08E7.5	yes		lgx-1	yes
			let-2	yes		mec-8	yes
			let-526	yes		ncx-10	yes
			let-805	yes		nhr-13	yes
			lfi-1	yes		nhr-137	yes
			lin-40	yes		nhr-195	yes
			mcd-1	yes		oac-38	yes
			mig-6	yes		R07B7.9	yes
			mlt-11	yes		rrf-1	yes
			nhr-62	yes		snpc-1.3	yes
			nhr-145	yes		spat-1	yes
			nurf-1	yes		spe-41	yes
			plx-1	yes		srz-85	yes
			pod-2	yes		T01D3.1	yes
			pqn-44	yes		T12G3.6	yes
			pqn-80	yes		T23B7.3	yes
			pqn-87	yes		tag-349	yes
			R11F4.1	yes		tdc-1	yes
			sam-10	yes		twk-14	yes
			sea-2	yes		W05H9.1	yes
			sma-9	yes		Y45F10D.10	yes
			spat-3	yes		Y49E10.16	yes
			spc-1	yes		ZK1058.9	yes
			ssl-1	yes		abt-3	no
			swsn-1	yes		acp-4	no
			T23E7.2	yes		acr-7	no
			tag-241	yes		aexr-2	no
			tbc-17	yes		AH9.6	no
			tfg-1	yes		arrd-27	no
			tln-1	yes		B0238.1	no
			unc-23	yes		B0478.3	no
			unc-33	yes		C01G12.7	no
			unc-44	yes		C03B1.2	no
			unc-52	yes		C03C10.2	no
			unc-54	yes		C03C11.2	no
			unc-69	yes		C04B4.2	no
			unc-70	yes		C14B1.2	no
			unc-89	yes		C14C6.3	no
			vab-10	yes		C17G10.7	no
			W09G3.6	yes		C18H2.5	no
			Y37A1B.5	yes		C25A1.1	no
			Y43F8B.2	yes		C27D9.1	no
			Y65B4BL.1	yes		C31B8.9	no
			zfh-2	yes		C31H2.4	no
			ZK180.5	yes		C31H5.5	no
			zyx-1	yes		C32E8.5	no
			aat-2	no		C39B10.1	no
			acs-2	no		C41D11.5	no
			apm-1	no		C46C11.2	no
			arid-1	no		C46E10.1	no
			asic-2	no		C52B11.5	no
			C17F4.3	no		C55B7.11	no
			C23F12.1	no		cbd-1	no
			chd-7	no		ceh-12	no
			clec-78	no		che-3	no
			D2063.1	no		chhy-1	no
			dpy-22	no		clec-113	no
			exc-4	no		clec-115	no
			F09C8.2	no		clec-154	no
			F18E3.11	no		clec-169	no
			F21C10.7	no		clec-222	no
			F35C11.2	no		clec-31	no
			F36A2.13	no		clec-51	no
			F49E12.12	no		clec-67	no
			F52G3.1	no		cpg-2	no
			F53B3.5	no		cpg-3	no
			F59A2.6	no		cpg-4	no
			fasn-1	no		cyn-5	no
			fmo-2	no		cyp-13A1	no
			frl-1	no		cyp-31A3	no
			gei-13	no		cyp-33E1	no
			glct-3	no		D1081.7	no
			gsnl-1	no		D2030.8	no
			H08J11.2	no		D2089.3	no
			H11E01.3	no		D2092.10	no
			hch-1	no		daf-10	no
			hsp-16.41	no		del-4	no
			ifa-3	no		dmsr-13	no
			K01B6.3	no		dmsr-14	no
			K10G9.2	no		dmsr-9	no
			klp-20	no		dpy-20	no
			lact-4	no		drh-2	no
			let-19	no		E03H12.5	no
			lips-10	no		ech-8	no
			mam-1	no		egg-1	no
			mdl-1	no		egg-4	no
			mxl-3	no		ent-3	no
			nhr-127	no		F14B8.6	no
			nhr-152	no		F14D2.7	no
			nhr-181	no		F15A8.4	no
			nhr-201	no		F16F9.4	no
			nhr-203	no		F22B3.7	no
			nhr-3	no		F26D11.4	no
			nmy-1	no		F27C1.11	no
			nnt-1	no		F30B5.4	no
			oac-39	no		F32D8.2	no
			oac-44	no		F32G8.2	no
			pis-1	no		F35C11.4	no
			pop-1	no		F35C11.5	no
			pqn-15	no		F36D1.9	no
			pqn-85	no		F41E7.6	no
			pxd-1	no		F42A10.8	no
			R07E3.6	no		F42A10.9	no
			R107.5	no		F44G4.3	no
			R10F2.1	no		F45D3.1	no
			set-16	no		F48E8.4	no
			set-26	no		F49E12.1	no
			set-9	no		F52H3.6	no
			snrp-200	no		F53B2.8	no
			sodh-1	no		F53B7.4	no
			srx-6	no		F54D12.9	no
			srz-78	no		F54F7.6	no
			swsn-3	no		F55E10.6	no
			T07C4.10	no		F57B10.4	no
			T15D6.8	no		F59A3.2	no
			T22D1.1	no		F59E12.8	no
			tag-257	no		F59F5.3	no
			unc-75	no		fbxa-202	no
			vglu-2	no		fbxa-4	no
			W06H8.6	no		fbxa-61	no
			wrt-6	no		fut-5	no
			Y37H9A.3	no		gcp-2.2	no
			Y39G8C.1	no		gcy-6	no
			Y48C3A.12	no		gcy-9	no
			Y50D7A.8	no		glh-2	no
			Y51F10.3	no		gly-13	no
			Y55B1BL.1	no		gpa-3	no
			Y73B3A.1	no		gpx-3	no
			Y95B8A.8	no		gtl-2	no
			zag-1	no		H22K11.3	no
						H31G24.1	no
						H39E23.2	no
						H43E16.1	no
						haf-9	no
						hst-3.1	no
						htp-1	no
						ima-2	no
						ins-18	no
						irld-29	no
						K06B9.2	no
						K07E8.7	no
						K07H8.8	no
						kel-10	no
						lgc-48	no
						lite-1	no
						lsl-1	no
						lst-6	no
						M01H9.5	no
						mccc-1	no
						mcu-1	no
						mocs-1	no
						mrp-6	no
						nas-33	no
						nhr-77	no
						nmur-1	no
						nphp-2	no
						npr-31	no
						octr-1	no
						oma-2	no
						osm-6	no
						otpl-3	no
						perm-1	no
						psf-2	no
						R10D12.8	no
						rad-54	no
						rme-2	no
						rpa-4	no
						sec-3	no
						set-28	no
						snt-2	no
						sqv-1	no
						sra-1	no
						srab-18	no
						srbc-41	no
						srd-10	no
						srd-33	no
						srd-50	no
						sre-1	no
						sre-26	no
						sre-40	no
						srg-64	no
						srh-255	no
						srh-61	no
						sri-77	no
						srj-49	no
						srsx-15	no
						srt-6	no
						srt-61	no
						srt-65	no
						srv-17	no
						srv-22	no
						srv-28	no
						srw-12	no
						srw-133	no
						srw-44	no
						srx-41	no
						srx-54	no
						srx-90	no
						srxa-10	no
						srxa-2	no
						str-226	no
						stt-3	no
						such-1	no
						sul-1	no
						swt-7	no
						T01H10.8	no
						T12F5.2	no
						T13F2.4	no
						T14B4.9	no
						T14G10.8	no
						T15D6.12	no
						T16G12.1	no
						T20D4.3	no
						T21B10.4	no
						T22D1.5	no
						T24D5.1	no
						T28B4.2	no
						T28F4.4	no
						taf-11.2	no
						tag-97	no
						tbc-16	no
						twk-10	no
						ugt-2	no
						W03B1.1	no
						W03D8.11	no
						W03D8.5	no
						W03F8.2	no
						W04G5.10	no
						W08F4.3	no
						wago-4	no
						wago-5	no
						wht-3	no
						Y17G7B.13	no
						Y39B6A.40	no
						Y39E4B.5	no
						Y40B1B.8	no
						Y40C7B.1	no
						Y46G5A.28	no
						Y48G1BL.5	no
						Y50F7A.2	no
						Y53G8AM.6	no
						Y57G11A.5	no
						Y59H11AR.4	no
						Y5H2B.1	no
						Y60A3A.19	no
						Y62E10A.14	no
						Y62F5A.9	no
						Y64G10A.6	no
						Y65B4BL.4	no
						Y71A12B.8	no
						Y92H12BR.4	no
						Y97E10B.1	no
						ZC132.3	no
						ZC449.1	no
						ZC477.2	no
						ZK1290.7	no
						ZK507.3	no

## Sheet: PCR Primers
Gene	Region amplified	Primers used	Size expected
bed-1 F	exon 8	AATTACGGAACGAATAAAACGGA	408/256
bed-1 R	exon 9	TTAGAGTGTACACAAAAACGAC
ZK180.5c F	exon 3	GTCGCCGGAGAGAGACCGAGATCG	911/411
ZK180.5c R	exon 4	TTAGTGGGTGCGGTATCCACCATC
ZK180.5b F	exon 3	AAGCCACCGTTGTCGAGGAGTCC	766/560
ZK180.5c R	exon 4	TTAGTGGGTGCGGTATCCACCATC
hsp-16.41 F	exon 1	ATGCTCATGCTCCGTTCTCCATA	432
hsp-16.41 R	exon 2	TTTTGCAACAAAATTGATCGGAA
F36A2.13 F	exon 4	CAAGTTCTACAAGGAAAGTCTAG	1000
F36A2.13 R	exon 8	GTCTATTTGAGCAGCAACACTTC
T15D6.8 F	exon 1	ATGAAACTCTACGTATTTTTAAG	456
T15D6.8 R	exon 3	TCGGAAGAATTGCCCATTTGGTT
ajm-1a F	exon 13	TATGGAAAATGGAGTTGAGCCAA	385
ajm-1a R	exon 14	CGTATTCATGTGAAGAAGTACC
cah-4 F	exon 3	TCCTTACCGCCAACCCATTTACCA	238
cah-4 R	exon 4	TAATTGTCATTGTATTTTCCTTC
ZK180.5a F	exon 3	TTCGTCGAGACCTCTGCCCCAGTT	464/393
ZK180.5a R	exon 4	TTAGTGGGTGCGGTATCCACCATC
asns-2 F	exon 1	ATGTGCGGCGTATTCTCAATTTG	1595
asns-2 R	exon 6	AGCCATCGAAGACTTGTCAGCAC
C55B7.11 F	exon 1	GTTTAAGTTTAAAAAGGTCTCC	141
C55B7.11 R	exon 1	AATTTGGGATTTTCTGAATACA
gcy-6 F	exon 11	GAGTCGGTGGTACAGTAGCCAT	333
gcy-6 R	exon 11	TGGCAAAGGTAAATAAATGCGA
dmsr-14 F	exon 6	CTTATTCCATGCACTCTAATGC	227
dmsr-14 R	exon 7	TTTAAATAATCAATGACTTCAAT
WO5H9.1 F	exon 1	ATGAGAACATTCTCAGTTGCACTG	590
WO5H9.1 R	exon 4	AATCGGTTTTCAATTCCTCCAGTT
